# Supplementary material for: Si-free enolate Claisen rearrangements of enamido substrates
Source: Royal Society of Chemistry journal article supplement (doi:10.1039/c2ob06853b), 2012-01-01
Supplement: c2ob06853b.pdf [file c2ob06853b.pdf]

## Si-Free Enolate Claisen Rearrangements of Enamido Substrates

Wesley R. R. Harker, Emma L. Carswell and David R. Carbery\*

*Department of Chemistry, University of Bath, Bath, BA2 7AY, UK*

*MSD, Newhouse, Lanarkshire, Scotland, ML1 5SH*

### Supporting Information

| <b>Contents</b>                         | <b>Page</b> |
|-----------------------------------------|-------------|
| <b>General Experimental Information</b> | <b>2</b>    |
| <b>Experimental Procedures</b>          | <b>3</b>    |
| <b>Chirality Transfer Study</b>         | <b>22</b>   |
| <b>Initial optimisation Attempts</b>    | <b>27</b>   |
| <b>NMR Spectra</b>                      | <b>28</b>   |
| <b>HPLC Chromatograms</b>               | <b>58</b>   |

---

## General Experimental Information

Reactions were conducted in flame dried vessels using anhydrous solvents and under an inert atmosphere of nitrogen. In all cases, solvents were obtained by passing through anhydrous alumina columns using an Innovative Technology Inc. PS-400-7 solvent purification system. All reagents were purchased from commercial suppliers: Acros Organics, Alfa Aesar, Sigma Aldrich or Novabiochem and used without purification. Triethylamine and chlorotrimethylsilane (over 10 % quinoline) were freshly distilled prior to use. All distilled materials were stored under nitrogen at 4 °C or less. All reactions were monitored by thin layer chromatography (TLC) using pre-coated MN Alugram Sil G/UV<sub>254</sub> silica gel 60 aluminium backed plates. Plates were developed using UV light followed by a chemical dip, usually KMnO<sub>4</sub> and gentle heating. Flash chromatography was performed on chromatography grade, silica 60Å particle size 35-70 micron from Fisher Scientific using the solvent system as stated. Compounds purified through preparative HPLC were subjected to the 'Waters Autopurification LC System'.

<sup>1</sup>H and <sup>13</sup>C were performed on a Brüker Avance 250 (250 MHz), Brüker Avance 300 (300 MHz), Brüker Avance 400 (400 MHz) and Brüker Avance 500 (500 MHz) as stated. Chemical shifts are reported in parts per million (ppm) relative to tetramethylsilane (TMS) ( $\delta = 0.00$ ). Coupling constants are reported in Hertz (Hz) and signal multiplicity is denoted as singlet (s), doublet (d), triplet (t), quartet (q), doublet of doublets (dd), doublet of triplets (dt), doublet of quartets (dq), quartet of triplets (qt), triplet of doublets (td), multiplet (m), quintet (quin) and broad (br). Mass spectroscopy was performed on a Brüker  $\mu$ TOF using electrospray ionisation (ESI) in either positive or negative ionisation as stated. Infra-red spectroscopy was carried out using a Perkin Elmer Spectrum RX FT-IR system with KBr plates, using a thin film.

## Experimental Procedures

### (*E*)-*N*-Allyl-*N*-(3-hydroxybut-1-enyl)-4-methylbenzenesulfonamide (**5e**)

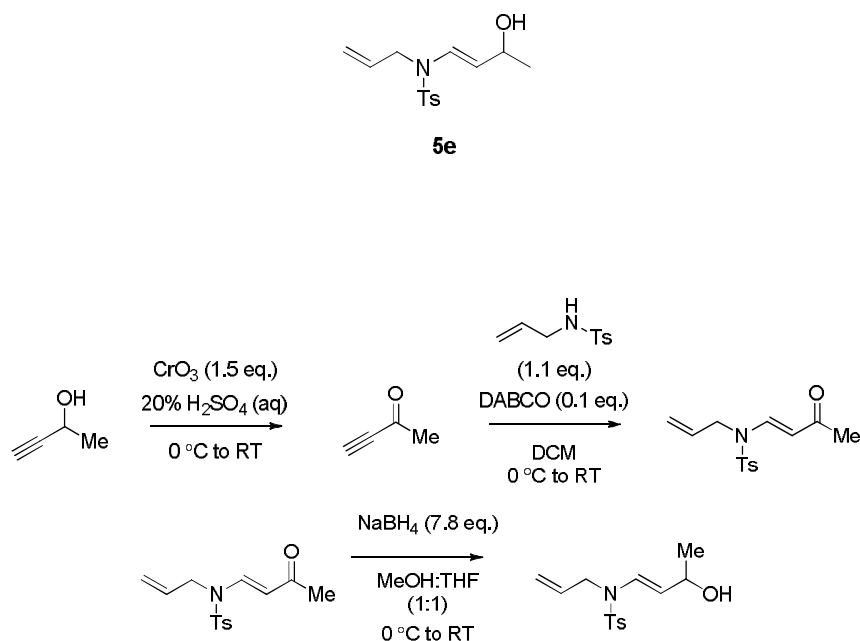

To a solution of  $\text{Cr(VI)O}_3$  (10.3 g, 103 mmol, 1.5 eq.) in 20%  $\text{H}_2\text{SO}_4$  (180 ml) at 0 °C under a nitrogen atmosphere was added a solution of 3-butyn-2-ol (5.00 g, 71.3 mmol, 1.0 eq.) in 20%  $\text{H}_2\text{SO}_4$  (180 ml) by dropwise addition. The reaction mixture was stirred at 0 °C for 12 hours and a colour change from orange to green was noted, saturated aqueous sodium bicarbonate was added and the organics were extracted with DCM (3 × 450 mL) and dried over  $\text{MgSO}_4$ . The crude butynone was chilled to 0 °C then *N*-allyl-4-methylbenzenesulfonamide (15.0 g, 78.4 mmol, 1.1 eq.) and DABCO (0.80 g, 7.13 mmol, 0.1 eq.) were added. The reaction mixture was allowed to stir for 12 hours whilst slowly warming to room temperature and a colour change from a clear to a deep maroon solution was noted. The reaction mixture was washed with 5% NaOH (3 × 500 ml), brine and then the organics were dried over  $\text{MgSO}_4$  and concentrated *in vacuo* to give a red oil which was subjected to flash column chromatography (25% EtOAc/Petrol 40-60°) to give the desired (*E*)-*N*-allyl-4-methyl-*N*-(3-oxobut-1-enyl)benzenesulfonamide **327** (10.5 g, 53%) as well as the -(*Z*) (0.79 g, 4%) as a brown oil in both cases.

**(E) product-** FTIR (film/ $\text{cm}^{-1}$ )  $\nu_{\text{max}}$ : 3082(s), 2980(s), 2879(s), 1682(s), 1586(s);  $^1\text{H}$  NMR (250MHz,  $\text{CDCl}_3$ )  $\delta$  2.22 (s, 3H), 2.44 (s, 3H), 4.07 (dt, 2H,  $J = 5.24, 1.59$  Hz), 5.13 (dm, 1H,  $J = 9.2$  Hz), 5.19

(m, 1H), 5.48 (d, 1H,  $J = 14.3$  Hz), 5.56 (ddt, 1H,  $J = 17.2, 10.6, 5.3$  Hz), 7.34 (m, 2H), 7.71 (m, 2H), 8.03 (d, 1H,  $J = 14.3$  Hz);  $^{13}\text{C}$  NMR (250MHz,  $\text{CDCl}_3$ )  $\delta$  21.7, 27.6, 48.3, 109.0, 118.9, 127.3, 129.9, 130.2, 135.3, 141.2, 145.1, 196.6; HRMS (ESI, +ve)  $m/z$  calcd. for  $\text{C}_{14}\text{H}_{18}\text{NO}_3\text{S}$  280.1007, found 280.0990 ( $\text{M}+\text{H}$ ) $^+$ .

**(Z) product-** FTIR (film/ $\text{cm}^{-1}$ )  $\nu_{\text{max}}$ : 3100(s), 2925(s), 1679(s), 1595(s);  $^1\text{H}$  NMR (250MHz,  $\text{CDCl}_3$ )  $\delta$  2.03 (s, 3H), 2.33 (s, 3H), 4.41 (dt, 2H,  $J = 5.7, 1.3$  Hz), 4.86 (dq, 1H,  $J = 29.0, 1.5$  Hz), 4.91 (dq, 1H,  $J = 22.3, 1.4$  Hz), 5.21 (ddq, 1H,  $J = 17.9, 10.3, 5.6$  Hz), 5.35 (d, 1H,  $J = 10.3$  Hz), 6.71 (d, 1H,  $J = 10.4$  Hz), 7.23 (m, 2H), 7.62 (m, 2H);  $^{13}\text{C}$  NMR (250MHz,  $\text{CDCl}_3$ )  $\delta$ : 21.5, 30.9, 49.67, 108.5, 118.4, 127.2, 130.0, 131.3, 133.3, 135.6, 144.7, 196.2; HRMS (ESI, +ve)  $m/z$  calcd. for  $\text{C}_{14}\text{H}_{18}\text{NO}_3\text{S}$  280.1007, found 280.0990 ( $\text{M}+\text{H}$ ) $^+$ . Formation of the minor *Z*-ene-sulfonamide was not observed on subsequent repeats of this reaction and yields in the order of 60% were obtained.

To a solution of (*E*)-*N*-allyl-4-methyl-*N*-(3-oxobut-1-enyl)benzenesulfonamide (1.00 g, 3.58 mmol, 1.0 eq.) in THF/MeOH (1:1, 40 mL) at 0 °C was added  $\text{NaBH}_4$  (1.03 g, 27.8 mmol, 7.8 eq.) by portionwise addition. The reaction mixture was allowed to stir whilst slowly warming to RT over 12 hours and then was poured onto sat. NaCl (100 mL) and extracted with DCM ( $3 \times 100$  mL), dried over  $\text{MgSO}_4$ , filtered and concentrated *in vacuo* to give (*E*)-*N*-allyl-*N*-(3-hydroxybut-1-enyl)-4-methylbenzenesulfonamide **5e** as a colourless oil (1.00 g, 100%). FTIR (film/ $\text{cm}^{-1}$ )  $\nu_{\text{max}}$ : 3392 (bs), 3086 (s), 2971(s), 2925 (s), 2871(s), 1708 (s), 1657 (s), 1597 (s);  $^1\text{H}$  NMR (250MHz,  $\text{CDCl}_3$ )  $\delta$  1.27 (d, 3H), 2.42 (s, 3H), 4.00 (dt, 2H,  $J = 5.2, 1.6$  Hz), 4.32 (m, 1H), 4.87 (dd, 1H,  $J = 14.2, 7.5\text{Hz}$ ), 5.18 (dm, 2H,  $J = 9.9\text{Hz}$ ), 5.32 (ddt, 1H,  $J = 17.4, 10.3, 5.2$  Hz), 6.89 (d, 1H,  $J = 14.2$  Hz), 7.30 (m, 2H), 7.67 (m, 2H);  $^{13}\text{C}$  NMR (250MHz,  $\text{CDCl}_3$ )  $\delta$  21.9, 24.4, 48.5, 68.1, 115.3, 118.3, 127.4, 127.5, 130.2, 131.9, 136.6, 144.3; HRMS (ESI, +ve)  $m/z$  calcd. for  $\text{C}_{14}\text{H}_{19}\text{NNaO}_3\text{S}$  304.0983, found 304.0978 ( $\text{M}+\text{Na}$ ) $^+$ .

#### **(E)-4-(*N*-Allyl-4-methylphenylsulfonamido)but-3-en-2-yl propionate (10a)**

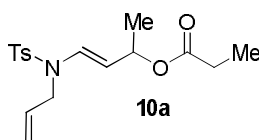

EDCi (0.54 g, 2.81 mmol) in DCM (100 mL), triethylamine (0.39 mL, 2.81 mmol), DMAP (0.02 g, 0.14 mmol), propionic acid (0.22 mL, 2.81 mmol) and (*E*)-*N*-allyl-*N*-(3-hydroxybut-1-enyl)-4-methylbenzenesulfonamide **5e** (0.40 g, 1.41 mmol) in DCM (10 mL) were combined according to

general procedure 1 (reaction time: 15 hours). Purification was achieved by reported procedure to afford (*E*)-4-(*N*-allyl-4-methylphenylsulfonamido)but-3-en-2-yl propionate **10a** as a yellow oil (0.40 g, 84%). FTIR (film/cm<sup>-1</sup>)  $\nu_{\max}$ : 3082 (m), 3039 (m), 2980 (m), 2931 (m), 2861 (m), 1727 (s), 1656 (s), 1597 (s); <sup>1</sup>H NMR (500 MHz, (CD<sub>3</sub>)<sub>2</sub>CO)  $\delta$ : 1.10 (t, 3H, *J* = 7.6 Hz, CH<sub>3</sub>CH<sub>2</sub>-), 1.29 (d, 3H, *J* = 6.6 Hz, CH<sub>3</sub>CH(CH-)O-), 2.25 (q, 2H, *J* = 7.6 Hz, CH<sub>3</sub>CH<sub>2</sub>-), 2.45 (s, 3H, -C<sub>6</sub>H<sub>4</sub>CH<sub>3</sub>), 3.96 (qd, 2H, *J* = 15.0, 5.4 Hz, -NCH<sub>2</sub>CHCH<sub>2</sub>), 4.80 (dd, 1H, *J* = 14.2, 6.6 Hz, -NCHCH-), 5.09–5.17 (m, 2H, CH<sub>2</sub>CHCH<sub>2</sub>N-), 5.34 (app. quin, 1H, *J* = 6.6 Hz, CH<sub>3</sub>CH(CH-)O-), 5.79 (ddt, 1H, *J* = 17.0, 10.3, 5.4 Hz, -NCH<sub>2</sub>CHCH<sub>2</sub>), 6.96 (d, 1H, *J* = 14.2 Hz, -NCHCH-), 7.29 (app. d, 2H, *J* = 7.6 Hz, ArH Ts), 7.65 (d, 2H, *J* = 7.6 Hz, ArH Ts); <sup>13</sup>C NMR (125 MHz, (CDCl<sub>3</sub>)  $\delta$ : 9.1, 21.0, 21.5, 27.9, 48.0, 69.8, 110.1, 117.9, 127.0, 129.5, 129.8, 131.3, 136.1, 143.9, 173.6; HRMS (ESI, +ve) *m/z* calcd. for C<sub>23</sub>H<sub>27</sub>NNaO<sub>4</sub>S 436.1558, found 436.1679 (M+Na)<sup>+</sup>.

**(*anti-E*)-Methyl 3-(*N*-allyl-4-methylphenylsulfonamido)-2-methylhex-4-enoate (11a)**

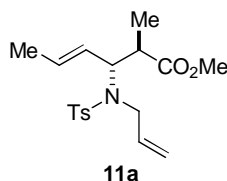

LiHMDS (1M in toluene, 1.34 mL, 1.34 mmol), triethylamine (1.81 mL, 13.4 mmol) and (*E*)-4-(*N*-allyl-4-methylphenylsulfonamido)but-3-en-2-yl propionate **10a** (0.10 g, 0.30 mmol) in THF (1 mL) was combined according to general procedure 4 (reaction time : 75 minutes). Treatment with diazomethane and purification by flash chromatography afforded (*anti-E*)-methyl 3-(*N*-allyl-4-methylphenylsulfonamido)-2-methylhex-4-enoate **11a** as a white solid (0.06 g, 55%, d.r. >25:1). M.p. 88–90 °C; FTIR (film/cm<sup>-1</sup>)  $\nu_{\max}$ : 2966 (m), 2916 (m), 1735 (s), 165s (m); <sup>1</sup>H NMR (500 MHz, CD<sub>3</sub>Cl)  $\delta$ : 1.06 (d, 3H, *J* = 6.9 Hz), 1.51 (dd, 3H, *J* = 6.4, 1.5 Hz), 2.39 (3H, s), 3.02 (ddt, 2H, *J* = 10.1, 7.8, 6.9 Hz), 2.83 (s, 3H), 3.69–3.85 (s, 2H), 4.27 (app. t, 1H, *J* = 10.1 Hz), 5.07–5.18 (m, 2H), 5.41 (ddq, 1H, *J* = 15.1, 10.1, 1.5 Hz), 5.55 (dq, 1H, *J* = 15.1, 6.4 Hz), 5.71 (ddt, 1H, *J* = 17.3, 10.2, 6.5 Hz), 7.26 (app. d, 2H, *J* = 8.2 Hz), 7.69 (app. d, 2H, *J* = 8.2 Hz); <sup>13</sup>C NMR (125 MHz, CD<sub>3</sub>Cl)  $\delta$ : 15.6, 17.7, 21.4, 43.4, 49.4, 51.7, 64.1, 117.6, 126.2, 127.7, 129.1, 132.1, 135.3, 137.8, 142.9, 175.0; HRMS (ESI, +ve) *m/z* calcd. for C<sub>18</sub>H<sub>25</sub>NO<sub>4</sub>S 352.1582, found 352.1577 (M+H)<sup>+</sup>.

---

### Methyl 2-(1-tosyl-2,5-dihydro-1H-pyrrol-2-yl)propanoate (**13a**)

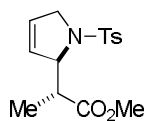

**13a**

*anti*-(*E*)-Methyl 3-(*N*-allyl-4-methylphenylsulfonamido)-2-methylhex-4-enoate **11a** (0.02 g, 0.05 mmol), catalytic Grubbs I and DCM (5 mL) were combined according to general procedure 6 (reaction time: 6 hours). Purification was achieved by the reported procedure to yield the methyl 2-(1-tosyl-2,5-dihydro-1H-pyrrol-2-yl)propanoate **13a** as a white solid (0.01 g, 79%). M.p. 95–97 °C; FTIR (film/cm<sup>-1</sup>)  $\nu_{\max}$ : 2960 (m), 2928 (m), 2878 (m), 1730 (s), 1597 (m); <sup>1</sup>H NMR (500 MHz, CD<sub>3</sub>Cl)  $\delta$ : 1.12 (d, 3H, *J* = 7.1 Hz), 2.44 (s, 3H), 3.31 (qd, 1H, *J* = 7.13, 3.96 Hz), 3.72 (s, 3H), 4.06–4.19 (m, 2H), 4.84–4.89 (m, 1H), 5.55 (app dq, 1H, *J* = 5.5, 2.2 Hz), 5.72 (app. dq, 1H, *J* = 5.5, 2.2 Hz), 7.33 (app. d, 2H, *J* = 8.1 Hz), 7.74 (app. d, 2H, *J* = 8.1 Hz); <sup>13</sup>C NMR (125 MHz, CD<sub>3</sub>Cl)  $\delta$ : 10.1, 21.5, 43.9, 51.8, 56.1, 67.9, 126.5, 126.8, 127.4, 129.8, 134.1, 143.6, 174.5; HRMS (ESI, +ve) *m/z* calcd. for C<sub>15</sub>H<sub>20</sub>NO<sub>4</sub>S 310.113, found 310.1108 (M+H)<sup>+</sup>.

### (*E*)-4-(*N*-Allyl-4-methylphenylsulfonamido)but-3-en-2-yl 3-methylbutanoate (**10b**)

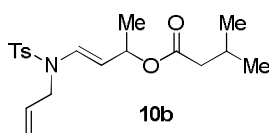

EDCi (0.54 g, 2.81 mmol) in DCM (100 mL), triethylamine (0.39 mL, 2.81 mmol), DMAP (0.02 g, 0.14 mmol), isovaleric acid (0.31 mL, 2.81 mmol) and (*E*)-*N*-allyl-*N*-(3-hydroxybut-1-enyl)-4-methylbenzenesulfonamide **5e** (0.40 g, 1.41 mmol) in DCM (10 mL) were combined according to general procedure 1 (reaction time: 15 hours). Purification was achieved by reported procedure to afford (*E*)-4-(*N*-allyl-4-methylphenylsulfonamido)but-3-en-2-yl 3-methylbutanoate **335** as a yellow oil (0.45 g, 87%). FTIR (film/cm<sup>-1</sup>)  $\nu_{\max}$ : 2960 (m), 2931 (m), 1725 (s), 1655 (s), 1597 (m); <sup>1</sup>H NMR (500 MHz, CD<sub>2</sub>Cl<sub>2</sub>)  $\delta$ : 0.92–0.96 (m, 6H), 1.32 (d, 3H, *J* = 6.6 Hz), 2.01–2.10 (m, 1H), 2.14 (d, 2H, *J* = 6.7 Hz), 2.44 (s, 3H), 3.94–4.06 (m, 2H), 4.83 (dd, 1H, *J* = 14.1, 6.6 Hz), 5.15 (d, 1H, *J* = 11.0 Hz), 5.18 (d, 1H, *J* = 17.6 Hz), 5.38 (app. quin, 1H, *J* = 6.6 Hz), 5.64 (ddt, 1H, *J* = 17.6, 11.0, 6.3 Hz), 7.02 (d, 1H, *J* = 14.1 Hz), 7.35 (app. d, 2H, *J* = 7.7 Hz), 7.69 (app. d, 2H, *J* = 7.7 Hz); <sup>13</sup>C NMR

(125 MHz, CD<sub>2</sub>Cl<sub>2</sub>)  $\delta$ : 20.8, 21.2, 22.1, 25.7, 43.6, 47.9, 69.6, 110.2, 117.5, 126.9, 129.6, 129.8, 131.4, 136.0, 144.1, 172.0; HRMS (ESI, +ve)  $m/z$  calcd. for C<sub>19</sub>H<sub>27</sub>NNaO<sub>4</sub>S 388.1558, found 388.1567 (M+Na)<sup>+</sup>.

**(anti-E)-Methyl 3-(N-allyl-4-methylphenylsulfonamido)-2-isopropylhex-4-enoate (11b)**

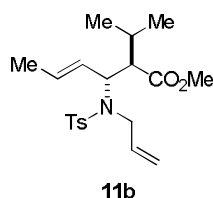

LiHMDS (1M in toluene, 2.47 mL, 2.47 mmol), triethylamine (3.42 mL, 24.7 mmol) and (*E*)-4-(*N*-allyl-4-methylphenylsulfonamido)but-3-en-2-yl 3-methylbutanoate **10b** (0.20 g, 0.55 mmol) in THF (2 mL) was combined according to general procedure 4 (reaction time : 75 minutes). Treatment with diazomethane and purification by flash chromatography afforded (*anti-E*)-methyl 3-(*N*-allyl-4-methylphenylsulfonamido)-2-isopropylhex-4-enoate **11b** as a white solid (0.14 g, 65%, d.r. >25:1). M.p. 105–107 °C; FTIR (film/cm<sup>-1</sup>)  $\nu_{\max}$ : 3082 (m), 3021 (m), 2985 (m), 2958 (m), 1730 (s), 1655 (m), 1615 (m), 1597 (m), 1509 (m); <sup>1</sup>H NMR (400 MHz, CD<sub>3</sub>Cl)  $\delta$ : 0.90 (d, 3H,  $J = 6.7$  Hz), 0.99 (d, 3H,  $J = 6.7$  Hz), 1.67 (d, 3H,  $J = 5.8$  Hz), 1.78–1.94 (1H, m), 2.43 (s, 3H), 3.08 (dd, 2H,  $J = 11.3, 2.7$  Hz), 3.65 (s, 3H), 3.67–3.86 (m, 2H), 4.45 (app. t, 1H,  $J = 11.3$  Hz), 5.07–5.28 (m, 1H), 5.48–5.80 (m, 1H), 7.27 (app. d, 2H,  $J = 8.1$  Hz), 7.72 (app. d, 2H,  $J = 8.1$  Hz); <sup>13</sup>C NMR (125 MHz, CD<sub>3</sub>Cl)  $\delta$ : 16.0, 17.8, 21.4, 21.9, 27.6, 51.1, 54.2, 61.9, 117.8, 126.9, 127.9, 129.1, 131.5, 135.2, 137.9, 142.9, 172.8; HRMS (ESI, +ve)  $m/z$  calcd. for C<sub>20</sub>H<sub>30</sub>NO<sub>4</sub>S 380.1895, found 380.1900 (M+H)<sup>+</sup>.

**Methyl 3-methyl-2-(1-tosyl-2,5-dihydro-1H-pyrrol-2-yl)butanoate (13b)**

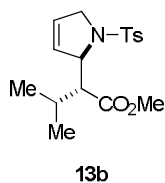

*anti-(E)*-Methyl 3-(*N*-allyl-4-methylphenylsulfonamido)-2-isopropylhex-4-enoate **11b** (0.05 g, 0.13 mmol), catalytic Grubbs I and DCM (5 mL) were combined according to general procedure 6 (reaction time: 13 hours). Purification was achieved by the reported procedure to yield the methyl 3-

methyl-2-(1-tosyl-2,5-dihydro-1H-pyrrol-2-yl)butanoate **13b** as an amorphous white solid (0.04 g, 86%). FTIR (film/cm<sup>-1</sup>)  $\nu_{\max}$ : 2994 (m), 2956 (m), 2878 (m), 1727 (s), 1598 (m); <sup>1</sup>H NMR (500 MHz, CD<sub>3</sub>Cl)  $\delta$ : 0.86 (d, 3H,  $J = 6.0$  Hz), 1.10 (d, 3H,  $J = 6.0$  Hz), 1.96–2.06 (m, 1H), 2.42 (s, 3H), 3.03 (app. t, 1H,  $J = 6.0$  Hz), 3.72 (s, 3H), 4.08–4.18 (m, 2H), 4.68–4.73 (m, 1H), 5.66 (app. dq, 1H,  $J = 6.4, 2.1$  Hz), 5.86 (app. dq, 1H,  $J = 6.4, 2.1$  Hz), 7.31 (app. d, 2H,  $J = 8.1$  Hz), 7.70 (app. d, 2H,  $J = 8.1$  Hz); <sup>13</sup>C NMR (125 MHz, CD<sub>3</sub>Cl)  $\delta$ : 20.0, 21.5, 22.7, 26.3, 51.2, 56.0, 67.6, 125.5, 127.5, 128.5, 129.7, 134.0, 143.6, 173.9; HRMS (ESI, +ve)  $m/z$  calcd. for C<sub>17</sub>H<sub>24</sub>NO<sub>4</sub>S 338.1426, found 338.1426 (M+H)<sup>+</sup>.

**(E)-4-(N-Allyl-4-methylphenylsulfonamido)but-3-en-2-yl pent-4-enoate (10c)**

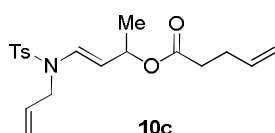

EDCi (0.54 g, 2.81 mmol) in DCM (100 mL), triethylamine (0.39 mL, 2.81 mmol), DMAP (0.02 g, 0.14 mmol), penteneic acid (0.28 g, 2.81 mmol) and (*E*)-*N*-allyl-*N*-(3-hydroxybut-1-enyl)-4-methylbenzenesulfonamide **5e** (0.40 g, 1.41 mmol) in DCM (20 mL) were combined according to general procedure 1 (reaction time: 15 hours). Purification was achieved by reported procedure to afford (*E*)-4-(*N*-allyl-4-methylphenylsulfonamido)but-3-en-2-yl pent-4-enoate **10c** as a yellow oil (0.51 g, 99%). FTIR (film/cm<sup>-1</sup>)  $\nu_{\max}$ : 3054 (m), 2981 (m), 2918 (m), 1718 (s), 1655 (s), 1597 (m); <sup>1</sup>H NMR (500 MHz, (CD<sub>3</sub>)<sub>2</sub>CO)  $\delta$ : 1.28 (d, 3H,  $J = 6.8$  Hz), 2.29–2.37 (m, 4H), 2.44 (s, 3H), 3.98–4.11 (m, 2H), 4.90 (dd, 1H,  $J = 14.4, 6.7$  Hz), 4.94 (dd, 1H,  $J = 10.1, 1.2$  Hz), 5.04 (dd, 1H,  $J = 17.1, 1.4$  Hz), 5.13 (dd, 1H,  $J = 10.1, 1.2$  Hz), 5.21 (dd, 1H,  $J = 17.1, 1.2$  Hz), 5.35 (app. quin, 1H,  $J = 6.8$  Hz), 5.66 (ddt, 1H,  $J = 17.1, 10.1, 5.4$  Hz), 5.78–5.92 (m, 1H), 7.01 (d, 1H,  $J = 14.4$  Hz), 7.44 (app. d, 2H,  $J = 8.2$  Hz), 7.74 (app. d, 2H,  $J = 8.2$  Hz); <sup>13</sup>C NMR (125 MHz, (CD<sub>3</sub>)<sub>2</sub>CO)  $\delta$ : 20.4, 20.5, 33.4, 34.0, 47.6, 69.7, 110.3, 114.7, 117.1, 127.0, 129.7, 129.8, 131.8, 136.3, 137.0, 144.1, 171.4; HRMS (ESI, +ve)  $m/z$  calcd. for C<sub>19</sub>H<sub>25</sub>NNaO<sub>4</sub>S 386.1402, found 386.1480 (M+Na)<sup>+</sup>.



**(anti-E)-Methyl 2-allyl-3-(N-allyl-4-methylphenylsulfonamido)hex-4-enoate (11c)**

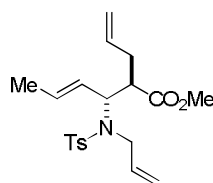

**11c**

LiHMDS (1M in toluene, 2.48 mL, 2.48 mmol), triethylamine (3.43 mL, 24.80 mmol) and (*E*)-4-(*N*-allyl-4-methylphenylsulfonamido)but-3-en-2-yl pent-4-enoate **10c** (0.20 g, 0.55 mmol) in THF (2 mL) was combined according to general procedure 4 (reaction time : 75 minutes). Treatment with diazomethane and purification by flash chromatography afforded (*anti-E*)-methyl 2-allyl-3-(*N*-allyl-4-methylphenylsulfonamido)hex-4-enoate **11c** as a yellow oil (0.15 g, 70%, d.r. 10:1). FTIR (film/cm<sup>-1</sup>)  $\nu_{\max}$ : 3012 (m), 2983 (m), 2934 (m), 1729 (s), 1655 (s), 1616 (s), 1596 (s), 1509 (m); <sup>1</sup>H NMR (400 MHz, CD<sub>3</sub>Cl)  $\delta$ : 1.66 (d, 3H, *J* = 6.3 Hz), 2.12–2.29 (2H, m), 2.43 (s, 3H), 3.08 (td, 1H, *J* = 10.6, 4.5 Hz), 3.66 (s, 3H), 3.74 (dd, 1H, *J* = 15.8, 6.7 Hz), 3.83 (dd, 1H, *J* = 16.0, 6.7 Hz), 4.33 (app. t, 1H, *J* = 10.6 Hz), 4.98–5.22 (m, 4H), 5.48 (dd, 1H, *J* = 15.5, 9.9 Hz), 5.60 (dq, 1H, *J* = 14.2, 6.3 Hz), 5.65–5.77 (m, 2H), 7.28 (app. d, 2H, *J* = 8.1 Hz), 7.73 (app. d, 2H, *J* = 8.1 Hz); <sup>13</sup>C NMR (125 MHz, CD<sub>3</sub>Cl)  $\delta$ : 17.8, 21.4, 34.9, 49.4, 49.5, 51.5, 63.2, 117.1, 117.8, 126.4, 127.8, 129.2, 132.4, 134.5, 135.1, 137.7, 143.0, 173.6; HRMS (ESI, +ve) *m/z* calcd. for C<sub>20</sub>H<sub>28</sub>NO<sub>4</sub>S 378.1739, found 378.1699 (M+H)<sup>+</sup>.

**Benzyloxy-acetic acid 3-[allyl-(toluene-4-sulfonyl)-amino]-1-methyl-allyl ester (10d)**

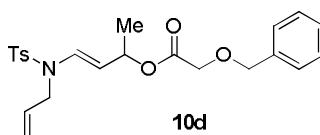

EDCi (0.54 g, 2.81 mmol) in DCM (100 mL), triethylamine (0.39 mL, 2.81 mmol), DMAP (0.02 g, 0.14 mmol), benzyloxyacetic acid (0.41 mL, 2.81 mmol) and (*E*)-*N*-allyl-*N*-(3-hydroxybut-1-enyl)-4-methylbenzenesulfonamide **5e** (0.40 g, 1.41 mmol) in DCM (20 mL) were combined according to general procedure 1 (reaction time: 15 hours). Purification was achieved by reported procedure to afford benzyloxy-acetic acid 3-[allyl-(toluene-4-sulfonyl)-amino]-1-methyl-allyl ester **10d** as a yellow oil (0.54 g, 87%). FTIR (film/cm<sup>-1</sup>)  $\nu_{\max}$ : 3051 (m), 2971 (m), 2934 (m), 1744 (s), 1655 (s),

1597 (m);  $^1\text{H}$  NMR (500 MHz,  $(\text{CD}_3)_2\text{CO}$ )  $\delta$ : 1.32 (d, 3H,  $J = 6.8$  Hz), 2.40 (s, 3H), 3.98–4.15 (m, 4H), 4.60 (s, 2H), 4.93 (dd, 1H,  $J = 14.3, 6.8$  Hz), 4.93 (dq, 1H,  $J = 10.5, 1.4$  Hz), 5.21 (dq, 1H,  $J = 17.2, 1.5$  Hz), 5.46 (app. quin, 1H,  $J = 6.8$  Hz), 5.65 (ddt, 1H,  $J = 17.2, 10.5, 5.2$  Hz), 7.08 (d, 1H,  $J = 14.3$  Hz), 7.28–7.43 (m, 7H), 7.74 (app. d, 2H,  $J = 8.1$  Hz);  $^{13}\text{C}$  NMR (125 MHz,  $(\text{CD}_3)_2\text{CO}$ )  $\delta$ : 20.4, 20.5, 47.6, 67.3, 70.5, 72.6, 109.9, 117.1, 127.0, 127.5, 127.7, 128.2, 129.8, 130.2, 131.7, 136.3, 138.1, 144.1, 169.3; HRMS (ESI, +ve)  $m/z$  calcd. for  $\text{C}_{23}\text{H}_{27}\text{NNaO}_5\text{S}$  452.1508, found 452.1543 ( $\text{M}+\text{Na}$ ) $^+$ .

**(E)-4-(N-Allyl-4-methylphenylsulfonamido)but-3-en-2-yl 2-phenylacetate (10e)**

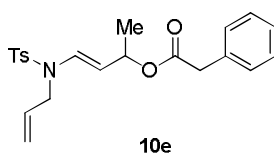

EDCi (0.68 g, 3.55 mmol) in DCM (100 mL), triethylamine (0.49 mL, 3.55 mmol), DMAP (0.02 g, 0.18 mmol), phenylacetic acid (0.48 g, 3.55 mmol) and (*E*)-*N*-allyl-*N*-(3-hydroxybut-1-enyl)-4-methylbenzenesulfonamide **5e** (0.50 g, 1.78 mmol) in DCM (20 mL) were combined according to general procedure 1 (reaction time: 15 hours). Purification was achieved by reported procedure to afford (*E*)-4-(*N*-allyl-4-methylphenylsulfonamido)but-3-en-2-yl 2-phenylacetate **10e** as a yellow oil (0.70 g, 98%). FTIR (film/ $\text{cm}^{-1}$ )  $\nu_{\text{max}}$ : 3051 (m), 2977 (m), 2922 (m), 1727 (s), 1655 (s), 1597 (m);  $^1\text{H}$  NMR (250 MHz,  $(\text{CD}_3)_2\text{CO}$ )  $\delta$ : 1.29 (d, 3H,  $J = 6.5$  Hz,  $\text{CH}_3\text{CH}(\text{CH}-)\text{O}-$ ), 2.40 (s, 3H,  $\text{CH}_3\text{C}_6\text{H}_4-$ ), 3.60 (s, 2H,  $-\text{CH}_2\text{C}_6\text{H}_5$ ), 3.93–4.10 (m, 2H,  $-\text{NCH}_2\text{CHCH}_2$ ), 4.88 (dd, 1H,  $J = 14.2, 6.5$  Hz,  $-\text{NCHCH}-$ ), 5.05–5.24 (m, 2H,  $-\text{NCH}_2\text{CHCH}_2$ ), 5.37 (app. quin, 1H,  $J = 6.5$  Hz,  $\text{CH}_3\text{CH}(\text{CH}-)\text{O}-$ ), 5.62 (ddt, 1H,  $J = 17.3, 10.4, 5.2$  Hz,  $-\text{NCH}_2\text{CHCH}_2$ ), 7.03 (d, 1H,  $J = 14.2$  Hz,  $-\text{NCHCH}-$ ), 7.23–7.37 (m, 5H,  $\text{CH}_2\text{C}_6\text{H}_5$ ), 7.39 (app. d, 2H,  $J = 8.3$  Hz,  $\text{ArH}$ ), 7.71 (app. d, 2H,  $J = 8.3$  Hz,  $\text{ArH}$ );  $^{13}\text{C}$  NMR (100 MHz,  $\text{CD}_3\text{Cl}$ )  $\delta$ : 20.9, 21.5, 41.7, 48.0, 70.7, 109.7, 117.9, 127.0 (x2), 128.5, 129.2, 129.8 (x2), 131.2, 134.2, 136.1, 143.9, 170.7; HRMS (ESI, +ve)  $m/z$  calcd. for  $\text{C}_{22}\text{H}_{25}\text{NNaO}_4\text{S}_1$  422.1411, found 422.1375 ( $\text{M}+\text{Na}$ ) $^+$ .

**(anti-E)-Methyl 3-(N-allyl-4-methylphenylsulfonamido)-2-phenylhex-4-enoate (11d)**

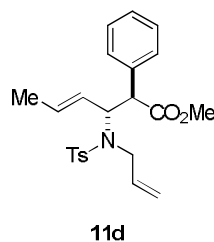

LiHMDS (1M in toluene, 0.63 mL, 0.63 mmol), TMSCl (0.19 mL, 2.91 mmol) and (*E*)-4-(*N*-allyl-4-methylphenylsulfonamido)but-3-en-2-yl 2-phenylacetate **10e** (0.10 g, 0.48 mmol) in THF (1 mL) was combined according to general procedure 3 (reaction time : 75 minutes). Treatment with diazomethane and purification by flash chromatography afforded (*anti-E*)-methyl 3-(*N*-allyl-4-methylphenylsulfonamido)-2-phenylhex-4-enoate **11d** as a white solid (0.06 g, 57%, d.r. >25:1). M.p. 103–104 °C; FTIR (film/cm<sup>-1</sup>)  $\nu_{\max}$ : 3032 (m), 2950 (m), 2855 (m), 1734 (s), 1668 (w), 1598 (m); <sup>1</sup>H NMR (500 MHz, CD<sub>3</sub>Cl)  $\delta$ : 1.28 (d, 3H, *J* = 4.8 Hz, CH<sub>3</sub>CH-), 2.33 (s, 3H, CH<sub>3</sub>C<sub>6</sub>H<sub>4</sub>-), 3.55 (s, 3H, -CO<sub>2</sub>CH<sub>3</sub>), 3.62–3.87 (m, 2H, -NCH<sub>2</sub>CHCH<sub>2</sub>), 4.19 (d, 1H, *J* = 11.2 Hz, -CHCO<sub>2</sub>CH<sub>3</sub>), 4.68 (dd, 1H, *J* = 11.2, 7.4 Hz, -NCH(CH-)CH-), 4.99–5.30 (m, 4H, CH<sub>2</sub>CHCH<sub>2</sub>N(Ts)CH(CH-)CHCHCH<sub>3</sub>), 5.63 (ddt, 1H, *J* = 17.0, 10.3, 6.5 Hz, -NCH(CH-)CH-), 7.08–7.30 (m, 7H, ArH), 7.65 (app. d, 2H, *J* = 8.2 Hz, ArH Ts); <sup>13</sup>C NMR (125 MHz, CD<sub>3</sub>Cl)  $\delta$ : 17.6, 21.4, 50.1, 52.0, 55.7, 63.7, 118.1, 125.9, 127.7, 127.8, 128.5, 128.9, 129.2, 131.8, 134.9, 135.8, 137.8, 143.1, 172.5; HRMS (ESI, +ve) *m/z* calcd. for C<sub>23</sub>H<sub>28</sub>NO<sub>4</sub>S 414.1739, found 414.1734 (M+H)<sup>+</sup>.

**Methyl 2-phenyl-2-(1-tosyl-2,5-dihydro-1H-pyrrol-2-yl)acetate (13c)**

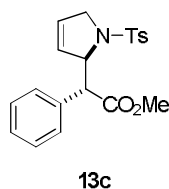

*anti-E*-Methyl 3-(*N*-allyl-4-methylphenylsulfonamido)-2-phenylhex-4-enoate **11d** (0.10 g, 0.24 mmol), catalytic Grubbs I and DCM (10 mL) were combined according to general procedure 6 (reaction time: 13 hours). Purification was achieved by the reported procedure to yield the methyl 2-phenyl-2-(1-tosyl-2,5-dihydro-1H-pyrrol-2-yl)acetate **13c** as a white solid (0.08 g, 92%). M.p. 98–100 °C. FTIR (film/cm<sup>-1</sup>)  $\nu_{\max}$ : 3024 (m), 2950 (m), 2931 (m), 1730 (s), 1657 (m), 1615 (m), 1596

(m), 1510 (m);  $^1\text{H}$  NMR (500 MHz,  $\text{CD}_3\text{Cl}$ )  $\delta$ : 2.43 (s, 3H), 3.39–3.45 (m, 1H), 3.73 (s, 3H), 3.85 (app. dq, 1H,  $J = 15.2, 2.1$  Hz), 4.48 (d, 1H,  $J = 4.4$  Hz), 5.06–5.06 (m, 1H), 5.43 (app. dq, 1H  $J = 6.4, 2.0$  Hz), 5.80 (app. dq, 1H  $J = 6.4, 2.0$  Hz), 7.23–7.30 (m, 5H), 7.32 (app. d, 2H,  $J = 8.2$  Hz), 7.73 (app. d, 2H,  $J = 8.2$  Hz);  $^{13}\text{C}$  NMR (125 MHz,  $\text{CD}_3\text{Cl}$ )  $\delta$ : 21.5, 52.0, 55.5, 56.2, 68.3, 129.9, 127.3 (x2), 127.6, 127.8, 129.8, 130.0, 134.0, 134.3, 143.6, 172.9; HRMS (ESI, +ve)  $m/z$  calcd. for  $\text{C}_{20}\text{H}_{22}\text{NO}_4\text{S}$  372.1269, found 372.1238 ( $\text{M}+\text{H}$ ) $^+$ .

**(E)-4-(N-Allyl-4-methylphenylsulfonamido)but-3-en-2-yl 2-(2-iodophenyl)acetate (10f)**

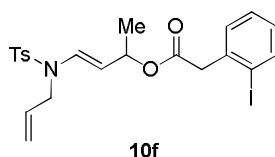

EDCi (0.54 g, 2.81 mmol) in DCM (100 mL), triethylamine (0.39 mL, 2.81 mmol), DMAP (0.02 g, 0.14 mmol), 2-Iodo phenylacetic acid (0.74 g, 2.81 mmol) and (*E*)-*N*-allyl-*N*-(3-hydroxybut-1-enyl)-4-methylbenzenesulfonamide **5e** (0.40 g, 1.41 mmol) in DCM (20 mL) were combined according to general procedure 1 (reaction time: 15 hours). Purification was achieved by reported procedure to afford (*E*)-4-(*N*-allyl-4-methylphenylsulfonamido)but-3-en-2-yl 2-(2-iodophenyl)acetate **10f** as a yellow oil (0.64 g, 86%). FTIR (film/ $\text{cm}^{-1}$ )  $\nu_{\text{max}}$ : 2978 (m), 2922 (m), 1727 (s), 1655 (s), 1596 (w);  $^1\text{H}$  NMR (500 MHz,  $(\text{CD}_3)_2\text{CO}$ )  $\delta$ : 1.31 (d, 3H,  $J = 6.6$  Hz), 2.44 (s, 3H), 3.77 (app. d, 2H), 3.97–4.08 (m, 2H), 4.91 (dd, 1H,  $J = 14.2, 6.6$  Hz), 5.12 (app. dq, 1H,  $J = 10.4, 1.4$  Hz), 5.20 (app. dq, 1H,  $J = 17.3, 1.7$  Hz), 5.39 (app. quin, 1H,  $J = 6.6$  Hz), 5.65 (ddt, 1H,  $J = 17.3, 10.4, 5.0$  Hz), 7.00–7.08 (m, 2H), 7.35–7.43 (m, 4H), 7.72 (app. d, 2H,  $J = 8.2$  Hz), 7.88 (d, 1H,  $J = 7.8$  Hz);  $^{13}\text{C}$  NMR (125 MHz,  $(\text{CD}_3)_2\text{CO}$ )  $\delta$ : 20.4, 20.5, 46.0, 47.6, 70.6, 100.6, 109.9, 117.1, 127.0, 128.4, 128.8, 129.8, 129.9, 131.0, 131.8, 136.4, 138.5, 139.2, 144.0, 169.0; HRMS (ESI, +ve)  $m/z$  calcd. for  $\text{C}_{22}\text{H}_{24}\text{INNaO}_4\text{S}$  548.0368, found 548.0407 ( $\text{M}+\text{Na}$ ) $^+$ .

**(anti-E)-Methyl 3-(N-allyl-4-methylphenylsulfonamido)-2-(2-iodophenyl) hex-4-enoate (11e)**

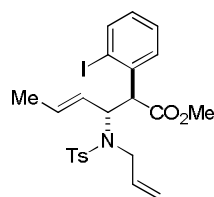

**11e**

LiHMDS (1M in toluene, 0.34 mL, 0.34 mmol), TMSCl (0.10 mL, 1.57 mmol) and (*E*)-4-(*N*-allyl-4-methylphenylsulfonamido)but-3-en-2-yl 2-(2-iodophenyl)acetate **10f** (0.07 g, 0.26 mmol) in THF (0.7 mL) was combined according to general procedure 3 (reaction time : 75 minutes). Treatment with diazomethane and purification by flash chromatography afforded (*anti-E*)-methyl 3-(*N*-allyl-4-methylphenylsulfonamido)-2-(2-iodophenyl)hex-4-enoate **11e** as a white solid (0.05 g, 67%, d.r. >25:1). M.p. 97–99 °C; FTIR (film/cm<sup>-1</sup>)  $\nu_{\text{max}}$ : 3179 (w), 2953 (m), 2922 (m), 1734 (s), 1597 (m); <sup>1</sup>H NMR (500 MHz, CD<sub>3</sub>Cl)  $\delta$ : 1.35 (d, 3H, *J* = 6.5 Hz), 2.41 (s, 3H), 3.63 (s, 3H), 3.83 (app. d, 1H, *J* = 17.3, 6.7 Hz), 3.93 (app. d, 1H, *J* = 17.3, 6.7 Hz), 4.75 (d, 1H, *J* = 11.7 Hz), 4.91 (d, 1H, *J* = 11.7 Hz), 5.14–5.23 (m, 2H), 5.25–5.37 (m, 2H), 5.79 (ddt, 1H, *J* = 17.0, 10.8, 6.7 Hz), 6.92 (app. t, 1H, *J* = 7.9 Hz), 7.26 (app. d, 2H, *J* = 8.7 Hz), 7.27–7.33 (m, 1H), 7.51 (app. d, 1H, *J* = 7.9 Hz), 7.74 (app. d, 2H, *J* = 8.7 Hz), 7.82 (d, 1H, *J* = 7.9 Hz); <sup>13</sup>C NMR (125 MHz, CD<sub>3</sub>Cl)  $\delta$ : 17.6, 21.4, 49.2, 52.2, 57.8, 64.2, 118.1, 124.7, 127.9, 128.5, 128.9, 129.0, 129.2, 129.3, 132.1, 135.0, 137.7, 138.9, 139.6, 143.1, 171.8; HRMS (ESI, +ve) *m/z* calcd. for C<sub>25</sub>H<sub>32</sub>NO<sub>6</sub>S 474.1950, found 474.1948 (M+H)<sup>+</sup>.

**Methyl 2-(2-iodophenyl)-2-(1-tosyl-2,5-dihydro-1H-pyrrol-2-yl)acetate (13d)**

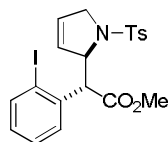

**13d**

*anti-E*-methyl 3-(*N*-allyl-4-methylphenylsulfonamido)-2-(2-iodophenyl)hex-4-enoate **11e** (0.09 g, 0.17 mmol), catalytic Grubbs I and toluene (5 mL) were combined according to general procedure 7 (reaction time : 5 hours). Purification was achieved by the reported procedure to yield the methyl 2-(2-iodophenyl)-2-(1-tosyl-2,5-dihydro-1H-pyrrol-2-yl)acetate **13d** as a white solid (0.04 g, 51%).

M.p. 186–188 °C; FTIR (film/cm<sup>-1</sup>)  $\nu_{\max}$ : 3026 (m), 2952 (m), 2878 (m), 1728 (s), 1597 (m); <sup>1</sup>H NMR (500 MHz, CD<sub>3</sub>Cl)  $\delta$ : 2.42 (s, 3H), 3.66–3.75 (m, 1H), 3.75 (s, 3H), 3.97 (app. dq, 1H  $J$  = 15.7, 1.9 Hz), 4.78 (d, 1H,  $J$  = 5.6 Hz), 5.19–5.24 (m, 1H), 5.50–5.59 (m, 2H), 6.95 (app. t, 1H,  $J$  = 7.4 Hz), 7.24–7.34 (m, 4H), 7.73 (app. d, 2H,  $J$  = 8.3 Hz), 7.89 (app. d, 1H,  $J$  = 7.4 Hz); <sup>13</sup>C NMR (125 MHz, CD<sub>3</sub>Cl)  $\delta$ : 21.5, 52.3, 55.5, 59.9, 68.7, 127.5, 127.6 (x2), 127.7, 129.1, 129.7, 129.9, 134.2, 136.3, 138.0, 140.2, 143.6, 172.2; HRMS (ESI, +ve)  $m/z$  calcd. for C<sub>22</sub>H<sub>21</sub>INO<sub>4</sub>S 498.0235, found 498.0259 (M+H)<sup>+</sup>.

#### ***anti*-methyl 1-tosyl-1,2,8,8a-tetrahydroindeno[2,1-b]pyrrole-8-carboxylate **14****

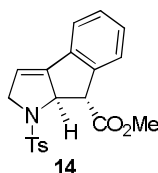

To a solution of Pd(OAc)<sub>2</sub> (3.00 mg, 0.01 mmol, 0.2 eq.), PPh<sub>3</sub> (3.67 mg, 0.01 mmol, 0.2 eq.), Ag<sub>2</sub>CO<sub>3</sub> (29.1 mg, 0.11 mmol, 1.5 eq.) in MeCN was added methyl 2-(2-iodophenyl)-2-(1-tosyl-2,5-dihydro-1H-pyrrol-2-yl)acetate **11e** (35.0 mg, 0.07 mmol, 1.0 eq.). The reaction mixture was refluxed for 4 hours and then concentrated *in vacuo* and subjected to flash column chromatography using ethyl acetate/petroleum ether 40–60° (20:80) to yield *anti*-methyl 1-tosyl-1,2,8,8a-tetrahydroindeno[2,1-b]pyrrole-8-carboxylate **14** as an amorphous clear solid (22.0 mg, 84%). FTIR (film/cm<sup>-1</sup>)  $\nu_{\max}$ : 2958 (m), 2919 (m), 2849 (m), 1734 (s), 1597 (m); <sup>1</sup>H NMR (500 MHz, CD<sub>3</sub>Cl)  $\delta$ : 2.47 (s, 3H, -C<sub>6</sub>H<sub>4</sub>CH<sub>3</sub>), 3.80 (s, 3H, -CO<sub>2</sub>CH<sub>3</sub>), 4.92 (br. d, 1H,  $J$  = 9.5 Hz, -NCHHCH-), 4.63 (br. s, 1H, -CHCO<sub>2</sub>CH<sub>3</sub>), 4.90 (dd, 1H,  $J$  = 9.5, 2.0 Hz, -NCHHCH-), 5.31 (app. dd, 1H,  $J$  = 4.1, 2.8 Hz, -NCH(CH-)CH-), 6.36 (app. dd, 1H,  $J$  = 4.1, 2.8 Hz, -NCH<sub>2</sub>CH-), 7.10–7.15 (m, 1H, ArH), 7.23–7.27 (m, 2H, ArH), 7.36 (app. d, 2H,  $J$  = 8.2 Hz, ArH, Ts), 7.45–7.51 (m, 1H, ArH), 7.75 (app. d, 2H,  $J$  = 8.2 Hz, ArH, Ts); <sup>13</sup>C NMR (125 MHz, CD<sub>3</sub>Cl)  $\delta$ : 21.6, 52.5, 54.5, 58.3, 66.1, 112.9, 125.1, 126.1, 127.8, 127.9, 128.6, 129.9, 130.5, 132.9, 137.8, 142.9, 144.2, 172.3; HRMS (ESI, +ve)  $m/z$  calcd. for C<sub>20</sub>H<sub>20</sub>N<sub>1</sub>O<sub>4</sub>S<sub>1</sub> 370.1148, found 370.1113 (M+H)<sup>+</sup>.

**(E)-4-(N-Allyl-4-methylphenylsulfonamido)but-3-en-2-yl 2-(4-methoxyphenyl)acetate (10g)**

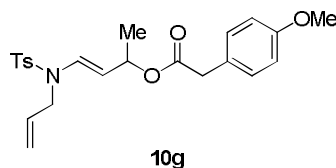

EDCi (0.54 g, 2.81 mmol) in DCM (100 mL), triethylamine (0.39 mL, 2.81 mmol), DMAP (0.02 g, 0.14 mmol), 4-methoxy phenylacetic acid (0.47 g, 2.81 mmol) and (E)-N-allyl-N-(3-hydroxybut-1-enyl)-4-methylbenzenesulfonamide **5e** (0.40 g, 1.41 mmol) in DCM (20 mL) were combined according to general procedure 1 (reaction time: 15 hours). Purification was achieved by reported procedure to afford (E)-4-(N-allyl-4-methylphenylsulfonamido)but-3-en-2-yl 2-(4-methoxyphenyl)acetate **10g** as a yellow oil (0.54 g, 81%). FTIR (film/cm<sup>-1</sup>)  $\nu_{\max}$ : 2978 (m), 2943 (m), 1726 (s), 1655 (s), 1613 (m), 1597 (w); <sup>1</sup>H NMR (250 MHz, (CD<sub>3</sub>)<sub>2</sub>CO)  $\delta$ : 1.27 (d, 3H, *J* = 6.5 Hz), 2.42 (s, 3H), 3.50 (2H, s), 3.77 (s, 3H), 3.92–4.05 (m, 2H), 4.86 (dd, 1H, *J* = 14.1, 6.5 Hz), 5.09 (dd, 1H, *J* = 10.7, 1.5 Hz), 5.16 (dd, 1H, *J* = 17.1, 1.5 Hz), 5.37 (app. quin, 1H, *J* = 6.5 Hz), 5.59 (ddt, 1H, *J* = 17.1, 10.7, 5.4 Hz), 6.85 (d, 2H, *J* = 8.5 Hz), 6.99 (d, 1H, *J* = 14.1 Hz), 7.17 (app. d, 2H, *J* = 8.3 Hz), 7.37 (app. d, 2H, *J* = 8.2 Hz), 7.68 (d, 2H, *J* = 8.2 Hz); <sup>13</sup>C NMR (125 MHz, (CD<sub>3</sub>)<sub>2</sub>CO)  $\delta$ : 21.3, 21.4, 41.0, 48.4, 55.4, 71.0, 111.0, 114.5, 118.0, 127.4, 127.8, 127.9, 130.7, 131.0, 132.6, 137.2, 144.9, 159.6, 171.3; HRMS (ESI, +ve) *m/z* calcd. for C<sub>23</sub>H<sub>27</sub>NNaO<sub>5</sub>S<sub>1</sub> 452.1508, found 452.1463 (M+Na)<sup>+</sup>.

**(anti-E)-Methyl 3-(N-allyl-4-methylphenylsulfonamido)-2-(4-methoxyphenyl)hex-4-enoate (11f)**

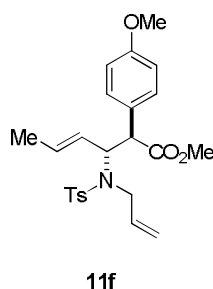

LiHMDS (1M in toluene, 1.16 mL, 1.16 mmol), TMSCl (0.35 mL, 5.35 mmol) and (E)-4-(N-allyl-4-methylphenylsulfonamido)but-3-en-2-yl 2-(4-methoxyphenyl)acetate **10g** (0.20 g, 0.89 mmol) in THF (2 mL) was combined according to general procedure 3 (reaction time : 75 minutes). Treatment

with diazomethane and purification by flash chromatography afforded (*anti-E*)-methyl 3-(*N*-allyl-4-methylphenylsulfonamido)-2-(4-methoxyphenyl)hex-4-enoate **11f** as a white solid (0.15 g, 73%, d.r. >25:1). M.p. 109–110 °C; FTIR (film/cm<sup>-1</sup>)  $\nu_{\max}$ : 3039 (w), 2952 (m), 2919 (m), 1734 (s), 1670 (w), 1608 (m), 1598 (m), 1522 (m), 1512 (m); <sup>1</sup>H NMR (500 MHz, CD<sub>3</sub>Cl)  $\delta$ : 1.39 (d, 3H, *J* = 4.5 Hz), 2.41 (s, 3H), 3.62 (s, 3H), 3.77 (s, 3H), 3.75–3.88 (m, 2H), 4.21 (d, 1H, *J* = 11.5 Hz), 4.73 (dd, 1H, *J* = 11.5, 7.44 Hz), 5.12 (app. d, 1H, *J* = 10.3 Hz), 5.20 (app d, 1H, *J* = 17.1 Hz), 5.23–5.33 (m, 2H), 5.70 (ddt, 1H, *J* = 17.1, 10.3, 6.5 Hz), 6.81 (app. d, 2H, *J* = 8.7 Hz), 7.22 (app. d, 2H, *J* = 8.7 Hz), 7.26 (app. d, 2H, *J* = 8.4 Hz), 7.73 (app. d, 2H, *J* = 8.4 Hz); <sup>13</sup>C NMR (125 MHz, CD<sub>3</sub>Cl)  $\delta$ : 17.6, 21.4, 50.0, 51.9, 54.9, 55.1, 63.6, 113.9, 118.0, 126.0, 127.8 (x2), 129.2, 129.9, 131.7, 134.9, 137.9, 143.0, 159.0, 172.8; HRMS (ESI, +ve) *m/z* calcd. for C<sub>24</sub>H<sub>30</sub>NO<sub>5</sub>S 444.1844, found 444.1857 (M+H)<sup>+</sup>.

### Methyl 2-(4-methoxyphenyl)-2-(1-tosyl-2,5-dihydro-1H-pyrrol-2-yl)acetate (**13e**)

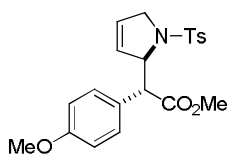

**13e**

*anti-E*-Methyl 3-(*N*-allyl-4-methylphenylsulfonamido)-2-(4-methoxyphenyl)hex-4-enoate **11f** (0.05 g, 0.11 mmol), catalytic Grubbs I and DCM (5 mL) were combined according to general procedure 6 (reaction time: 13 hours). Purification was achieved by the reported procedure to yield the methyl 2-(4-methoxyphenyl)-2-(1-tosyl-2,5-dihydro-1H-pyrrol-2-yl)acetate **13e** as a clear oil (0.04 g, 89%). FTIR (film/cm<sup>-1</sup>)  $\nu_{\max}$ : 3035 (m), 2953 (m), 2884 (m), 1727 (s), 1597 (m), 1512 (m); <sup>1</sup>H NMR (500 MHz, CD<sub>3</sub>Cl)  $\delta$ : 2.42 (s, 3H), 3.44 (ddt, 1H, *J* = 15.0, 5.4, 2.0 Hz), 3.72 (s, 3H), 3.79 (s, 3H), 3.85 (app. dq, 1H, *J* = 15.0, 2.0 Hz), 4.42 (d, 1H, *J* = 4.3 Hz), 4.97–5.02 (m, 1H), 5.44 (app. dq, 1H *J* = 6.4, 2.0 Hz), 5.80 (app. dq, 1H *J* = 6.4, 2.0 Hz), 6.82 (app. d, 2H, *J* = 8.6 Hz), 7.17 (app. d, 2H, *J* = 8.6 Hz), 7.31 (app. d, 2H, *J* = 8.6 Hz), 7.72 (app. d, 2H, *J* = 8.6 Hz); <sup>13</sup>C NMR (125 MHz, CD<sub>3</sub>Cl)  $\delta$ : 21.5, 52.0, 55.1, 55.4, 55.5, 68.4, 113.3, 126.0, 127.0, 127.3, 127.6, 129.8, 131.1, 134.4, 143.6, 158.8, 173.1; HRMS (ESI, +ve) *m/z* calcd. for C<sub>21</sub>H<sub>24</sub>NO<sub>5</sub>S 402.1375, found 402.1366 (M+H)<sup>+</sup>.



**(*E*)-4-(*N*-Allyl-4-methylphenylsulfonamido)but-3-en-2-yl 2-(4-nitrophenyl)acetate (**10h**)**

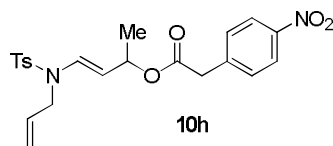

EDCi (0.54 g, 2.81 mmol) in DCM (100 mL), triethylamine (0.39 mL, 2.81 mmol), DMAP (0.02 g, 0.14 mmol), 4-nitrophenylacetic acid (0.51 g, 2.81 mmol) and (*E*)-*N*-allyl-*N*-(3-hydroxybut-1-enyl)-4-methylbenzenesulfonamide **5e** (0.40 g, 1.41 mmol) in DCM (20 mL) were combined according to general procedure 1 (reaction time: 15 hours). Purification was achieved by reported procedure to afford (*E*)-4-(*N*-allyl-4-methylphenylsulfonamido)but-3-en-2-yl 2-(4-nitrophenyl)acetate **10h** as an orange oil (0.54 g, 86%). FTIR (film/cm<sup>-1</sup>)  $\nu_{\max}$ : 3018 (w), 2988 (m), 2967 (m), 1727 (s), 1698 (s), 1656 (m), 1599 (w), 1522 (m); <sup>1</sup>H NMR (500 MHz, (CD<sub>3</sub>)<sub>2</sub>CO)  $\delta$ : 1.29 (d, 3H, *J* = 6.7 Hz), 2.41 (s, 3H), 3.80 (2H, s), 3.95–4.05 (m, 2H), 4.87 (dd, 1H, *J* = 14.5, 6.7 Hz), 5.08 (dq, 1H, *J* = 10.7, 1.95 Hz), 5.15 (dq, 1H, *J* = 17.2, 1.3 Hz), 5.38 (app. quin, 1H, *J* = 6.7 Hz), 5.59 (ddt, 1H, *J* = 17.2, 10.7, 5.1 Hz), 7.00 (d, 1H, *J* = 14.5 Hz), 7.38 (app. d, 2H, *J* = 7.9 Hz), 7.57 (app. d, 2H, *J* = 8.7 Hz), 7.69 (app. d, 2H, *J* = 7.9 Hz), 8.18 (app. d, 2H, *J* = 8.7 Hz); <sup>13</sup>C NMR (100 MHz, (CD<sub>3</sub>)<sub>2</sub>CO)  $\delta$ : 20.3, 20.5, 40.6, 47.5, 70.9, 109.6, 117.1, 123.3, 126.9, 129.8, 130.1, 130.5, 131.6, 136.3, 142.5, 144.1, 147.0, 169.2; HRMS (ESI, +ve) *m/z* calcd. for C<sub>44</sub>H<sub>48</sub>N<sub>4</sub>NaO<sub>12</sub>S<sub>2</sub> 911.2613, found 911.2604 (2M+Na)<sup>+</sup>.

**(*anti-E*)-Methyl 3-(*N*-allyl-4-methylphenylsulfonamido)-2-(4-nitrophenyl)hex-4-enoate (**11g**)**

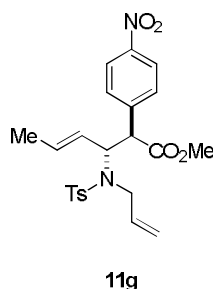

LiHMDS (1M in toluene, 1.13 mL, 1.13 mmol), TMSCl (0.34 mL, 5.22 mmol) and (*E*)-4-(*N*-allyl-4-methylphenylsulfonamido)but-3-en-2-yl 2-(4-nitrophenyl)acetate **10h** (0.20 g, 0.87 mmol) in THF (2 mL) was combined according to general procedure 3 (reaction time : 75 minutes). Treatment with diazomethane and purification by flash chromatography, recrystallisation and a two subsequent recrystallisations of the mother liquor afforded (*anti-E*)-methyl 3-(*N*-allyl-4-

methylphenylsulfonamido)-2-(4-nitrophenyl)hex-4-enoate **11g** as an off white solid (0.10 g, 53%, d.r. 20:1). M.p. 128–130 °C; FTIR (film/cm<sup>-1</sup>)  $\nu_{\max}$ : 3018 (w), 2988 (m), 2952 (m) 2925 (m), 1736 (s), 1669 (w), 1598 (m), 1521 (s); <sup>1</sup>H NMR (500 MHz, CD<sub>3</sub>Cl)  $\delta$ : 1.38 (dd, 3H, *J* = 6.2, 1.0 Hz), 2.42 (s, 3H), 3.69 (s, 3H), 3.78 (dd, 1H, *J* = 16.0, 6.8 Hz), 3.86 (dd, 1H, *J* = 16.0, 6.8 Hz), 4.49 (d, 1H, *J* = 11.2 Hz), 4.69 (app. t, 1H, *J* = 11.2 Hz), 5.17 (app. d, 1H, *J* = 10.2 Hz), 5.23 (app. d, 1H, *J* = 17.0 Hz), 5.20–5.38 (m, 2H), 5.69 (ddt, 1H, *J* = 17.0, 10.2, 6.8 Hz), 7.28 (app. d, 2H, *J* = 8.2 Hz), 7.51 (app. d, 2H, *J* = 8.2 Hz), 7.73 (app. d, 2H, *J* = 8.2 Hz), 8.16 (app. d, 2H, *J* = 8.2 Hz); <sup>13</sup>C NMR (125 MHz, CD<sub>3</sub>Cl)  $\delta$ : 17.5, 21.4, 50.5, 52.5, 55.6, 63.8, 118.6, 123.7, 125.4, 127.8, 129.3, 129.9, 132.9, 134.5, 137.5, 143.2, 143.4, 147.4, 171.5; HRMS (ESI, +ve) *m/z* calcd. for C<sub>23</sub>H<sub>26</sub>N<sub>2</sub>O<sub>6</sub>S 481.1409, found 481.1715 (M+Na)<sup>+</sup>.

### Methyl 2-(4-nitrophenyl)-2-(1-tosyl-2,5-dihydro-1H-pyrrol-2-yl)acetate (**13f**)

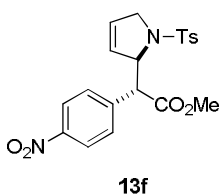

*anti*-(*E*)-Methyl 3-(*N*-allyl-4-methylphenylsulfonamido)-2-(4-nitrophenyl)hex-4-enoate **11g** (0.03 g, 0.07 mmol), catalytic Grubbs I and DCM (5 mL) were combined according to general procedure 6 (reaction time : 13 hours). Purification was achieved by the reported procedure to yield the methyl 2-(4-nitrophenyl)-2-(1-tosyl-2,5-dihydro-1H-pyrrol-2-yl)acetate **13f** as an off white solid (0.03 g, 96%). M.p. 178–180 °C; FTIR (film/cm<sup>-1</sup>)  $\nu_{\max}$ : 3030 (m), 2954 (m), 1732 (s), 1599 (s), 1521 (s); <sup>1</sup>H NMR (500 MHz, CD<sub>3</sub>Cl)  $\delta$ : 2.44 (s, 3H), 3.34–3.42 (m, 1H), 3.76 (s, 3H), 3.84 (app. d, 1H, *J* = 15.6 Hz), 4.69 (d, 1H, *J* = 4.2 Hz), 5.03–5.09 (m, 1H), 5.48–5.54 (m, 1H), 5.80–5.85 (m, 1H), 7.34 (app. d, 2H, *J* = 8.1 Hz), 7.45 (app. d, 2H, *J* = 8.4 Hz), 7.72 (app. d, 2H, *J* = 8.1 Hz), 8.16 (app. d, 2H, *J* = 8.4 Hz); <sup>13</sup>C NMR (125 MHz, CD<sub>3</sub>Cl)  $\delta$ : 21.5, 52.4, 55.6, 55.7, 68.2, 122.8, 126.7, 127.4, 127.8, 129.9, 131.2, 133.7, 141.5, 144.0, 147.3, 171.6; HRMS (ESI, +ve) *m/z* calcd. for C<sub>20</sub>H<sub>21</sub>N<sub>2</sub>O<sub>6</sub>S 417.1120, found 417.1123 (M+H)<sup>+</sup>.

**(E)-4-(N-Allyl-4-methylphenylsulfonamido)but-3-en-2-yl 2-(2,4-dichlorophenyl)acetate (10i)**

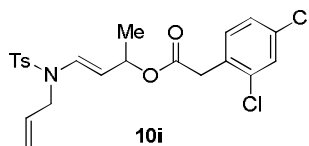

EDCi (0.54 g, 2.81 mmol) in DCM (100 mL), triethylamine (0.39 mL, 2.81 mmol), DMAP (0.02 g, 0.14 mmol), 2,4-dichlorophenylacetic acid (0.58 g, 2.81 mmol) and (*E*)-*N*-allyl-*N*-(3-hydroxybut-1-enyl)-4-methylbenzenesulfonamide **5e** (0.40 g, 1.41 mmol) in DCM (20 mL) were combined according to general procedure 1 (reaction time: 15 hours). Purification was achieved by reported procedure to afford (*E*)-4-(*N*-allyl-4-methylphenylsulfonamido)but-3-en-2-yl 2-(2,4-dichlorophenyl)acetate **10i** as a yellow oil (0.55 g, 82%). FTIR (film/cm<sup>-1</sup>)  $\nu_{\max}$ : 3091 (m), 2978 (m), 2937 (m), 1729 (s), 1655 (s), 1614 (s), 1591 (s), 1509 (s); <sup>1</sup>H NMR (500 MHz, (CD<sub>3</sub>)<sub>2</sub>CO)  $\delta$ : 1.29 (d, 3H, *J* = 6.7 Hz), 2.44 (s, 3H), 3.76 (2H, s), 3.97–4.07 (m, 2H), 4.89 (dd, 1H, *J* = 14.2, 6.7 Hz), 5.12 (app d, 1H, *J* = 10.3 Hz), 5.19 (app d, 1H, *J* = 17.2 Hz), 5.38 (app. quin, 1H, *J* = 6.7 Hz), 5.63 (ddt, 1H, *J* = 17.2, 10.3, 5.1 Hz), 7.01 (d, 1H, *J* = 14.2 Hz), 7.32–7.47 (m, 4H), 7.50 (d, 1H, *J* = 1.9 Hz), 7.71 (app. d, 2H, *J* = 8.2 Hz); <sup>13</sup>C NMR (125 MHz, (CD<sub>3</sub>)<sub>2</sub>CO)  $\delta$ : 20.4, 20.5, 38.4, 47.6, 70.8, 109.7, 117.1, 126.9, 127.2, 128.7, 129.8, 129.9, 131.7, 132.2, 133.0, 133.1, 135.1, 136.4, 144.0, 168.7; HRMS (ESI, +ve) *m/z* calcd. for C<sub>22</sub>H<sub>23</sub>Cl<sub>2</sub>N<sub>1</sub>NaO<sub>4</sub>S<sub>1</sub> 490.0617, found 490.0614 (M+Na)<sup>+</sup>.

**(anti-E)-Methyl 3-(N-allyl-4-methylphenylsulfonamido)-2-(2,4-dichlorophenyl)hex-4-enoate (11h)**

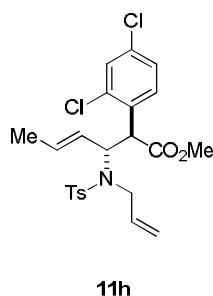

LiHMDS (1M in toluene, 1.07 mL, 1.07 mmol), TMSCl (0.33 mL, 4.94 mmol) and (*E*)-4-(*N*-allyl-4-methylphenylsulfonamido)but-3-en-2-yl 2-(2,4-dichlorophenyl)acetate **10i** (0.20 g, 0.82 mmol) in THF (2 mL) was combined according to general procedure 3 (reaction time : 75 minutes). Treatment with diazomethane and purification by flash chromatography afforded (*anti-E*)-methyl 3-(*N*-allyl-4-

methylphenylsulfonamido)-2-(2,4-dichlorophenyl)hex-4-enoate **11h** as a yellow oil (0.14 g, 68%, d.r. >25:1). FTIR (film/cm<sup>-1</sup>)  $\nu_{\max}$ : 3034 (w), 2950 (m), 2919 (m), 1736 (s), 1669 (m), 1598 (m), 1523 (m), 1512 (m); <sup>1</sup>H NMR (500 MHz, CD<sub>3</sub>Cl)  $\delta$ : 1.37 (d, 3H,  $J = 5.8$  Hz), 2.41 (s, 3H), 3.65 (s, 3H), 3.80 (dd, 1H,  $J = 15.9, 6.9$  Hz), 3.92 (dd, 1H,  $J = 15.9, 6.9$  Hz), 4.79 (dd, 1H,  $J = 11.5, 8.6$  Hz), 4.90 (d, 1H,  $J = 11.5$  Hz), 5.15 (app. d, 1H,  $J = 10.2$  Hz), 5.18–5.33 (m, 3H), 5.71 (ddt, 1H,  $J = 16.9, 10.3, 6.9$  Hz), 7.21 (dd, 2H,  $J = 8.3, 2.3$  Hz), 7.26 (app. d, 2H,  $J = 8.2$  Hz), 7.36 (d, 1H,  $J = 2.3$  Hz), 7.51 (d, 1H,  $J = 8.3$  Hz), 7.72 (app. d, 2H,  $J = 8.2$  Hz); <sup>13</sup>C NMR (125 MHz, CD<sub>3</sub>Cl)  $\delta$ : 17.6, 21.4, 49.5, 49.6, 52.3, 63.9, 118.2, 124.7, 127.4, 127.8, 129.2, 129.3, 130.3, 132.4, 132.5, 133.9, 134.9, 135.2, 137.6, 143.2, 171.5; HRMS (ESI, +ve)  $m/z$  calcd. for C<sub>23</sub>H<sub>26</sub>Cl<sub>2</sub>NO<sub>4</sub>S 482.0959, found 482.0971 (M+H)<sup>+</sup>.

### Methyl 2-(2,4-dichlorophenyl)-2-(1-tosyl-2,5-dihydro-1H-pyrrol-2-yl)acetate (**13g**)

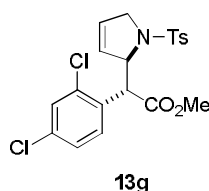

*anti*-(*E*)-Methyl 3-(*N*-allyl-4-methylphenylsulfonamido)-2-(2,4-dichlorophenyl)hex-4-enoate **11h** (0.04 g, 0.08 mmol), catalytic Grubbs I and toluene (5 mL) were combined according to general procedure 7 (reaction time : 5 hours). Purification was achieved by the reported procedure to yield the methyl 2-(2,4-dichlorophenyl)-2-(1-tosyl-2,5-dihydro-1H-pyrrol-2-yl)acetate **13g** as a white solid (0.03 g, 83%). M.p. 147–148 °C; FTIR (film/cm<sup>-1</sup>)  $\nu_{\max}$ : 3039 (m), 2953 (m), 2931 (m), 2876 (m), 1734 (s), 1589 (m), 1542 (w), 1524 (w); <sup>1</sup>H NMR (500 MHz, CD<sub>3</sub>Cl)  $\delta$ : 2.43 (s, 3H), 3.52 (ddt, 1H,  $J = 15.4, 5.2, 2.2$  Hz), 3.74 (s, 3H), 3.84 (app. dq, 1H,  $J = 15.4, 2.2$  Hz), 4.83 (d, 1H,  $J = 4.5$  Hz), 5.14–5.23 (m, 1H), 5.50 (app. dq, 1H,  $J = 6.3, 2.2$  Hz), 5.79 (app. dq, 1H,  $J = 6.3, 2.2$  Hz), 7.21 (d, 1H,  $J = 2.1$  Hz), 7.29–7.36 (m, 3H), 7.38 (app. d, 1H,  $J = 2.1$  Hz), 7.72 (app. d, 2H,  $J = 8.2$  Hz); <sup>13</sup>C NMR (125 MHz, CD<sub>3</sub>Cl)  $\delta$ : 21.5, 52.3, 53.2, 55.4, 68.5, 126.6, 127.0, 127.2, 127.4, 129.7, 129.8, 131.1, 133.4, 133.9, 134.0, 135.7, 143.8, 171.8; HRMS (ESI, +ve)  $m/z$  calcd. for C<sub>20</sub>H<sub>20</sub>Cl<sub>2</sub>NO<sub>5</sub>S 440.0490, found 440.0686 (M+H)<sup>+</sup>.

**(E)-4-(N-Allyl-4-methylphenylsulfonamido)but-3-en-2-yl 2-(benzo[d][1,3]dioxol-5-yl)acetate (10j)**

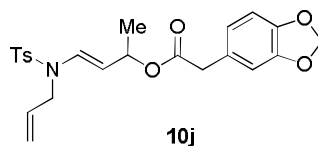

EDCi (0.54 g, 2.81 mmol) in DCM (100 mL), triethylamine (0.391, 2.81 mmol), DMAP (0.02 g, 0.14 mmol), 3,4-methylenedioxyphenylacetic acid (0.51 g, 2.81 mmol) and (*E*)-*N*-allyl-*N*-(3-hydroxybut-1-enyl)-4-methylbenzenesulfonamide **5e** (0.40 g, 1.41 mmol) in DCM (20 mL) were combined according to general procedure 1 (reaction time: 15 hours). Purification was achieved by reported procedure to afford (*E*)-4-(*N*-allyl-4-methylphenylsulfonamido)but-3-en-2-yl 2-(benzo[d][1,3]dioxol-5-yl)acetate **10j** as a yellow oil (0.54 g, 86%). FTIR (film/cm<sup>-1</sup>)  $\nu_{\max}$ : 3049 (m), 2916 (m), 1729 (s), 1655 (s), 1503 (s); <sup>1</sup>H NMR (500 MHz, CD<sub>3</sub>Cl)  $\delta$ : 1.30 (d, 3H, *J* = 6.6 Hz), 2.41 (s, 3H), 3.46 (2H, s), 3.89–4.01 (m, 2H), 4.76 (dd, 1H, *J* = 14.3, 6.6 Hz), 5.10 (app. d, 1H, *J* = 10.3 Hz), 5.10 (app. d, 1H, *J* = 17.0 Hz), 5.32 (app. quin, 1H, *J* = 6.6 Hz), 5.50 (ddt, 1H, *J* = 17.0, 10.3, 5.3 Hz), 5.91 (s, 2H), 6.65–6.75 (m, 3H), 6.97 (d, 1H, *J* = 14.3 Hz), 7.26 (app. d, 2H, *J* = 7.8 Hz), 7.63 (app. d, 2H, *J* = 7.8 Hz); <sup>13</sup>C NMR (125 MHz, CD<sub>3</sub>Cl)  $\delta$ : 20.9, 21.5, 30.9, 41.2, 47.9, 70.6, 100.9, 108.2, 109.6 (x2), 117.8, 122.2, 127.0, 127.1, 127.7, 129.7, 129.8, 131.2, 136.0, 143.9, 146.6, 147.7, 170.7; HRMS (ESI, +ve) *m/z* calcd. for C<sub>23</sub>H<sub>25</sub>NNaO<sub>6</sub>S 466.1300, found 466.1295 (M+Na)<sup>+</sup>.

**(anti-E)-Methyl 3-(N-allyl-4-methylphenylsulfonamido)-2-(benzo[d][1,3]dioxol-5-yl)hex-4-enoate (11i)**

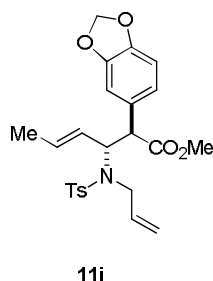

LiHMDS (1M in toluene, 0.55 mL, 0.55 mmol), TMSCl (0.17 mL, 2.53 mmol) and (*E*)-4-(*N*-allyl-4-methylphenylsulfonamido)but-3-en-2-yl 2-(benzo[d][1,3]dioxol-5-yl)acetate **10j** (0.10 g, 0.42 mmol) in THF (1 mL) was combined according to general procedure 3 (reaction time : 75 minutes).

Treatment with diazomethane and purification by flash chromatography afforded (*anti-E*)-methyl 3-(*N*-allyl-4-methylphenylsulfonamido)-2-(benzo[d][1,3]dioxol-5-yl)hex-4-enoate **11i** as a white solid (0.06 g, 55%, d.r. >25:1). M.p. 119–121 °C; FTIR (film/cm<sup>-1</sup>)  $\nu_{\max}$ : 3020 (w), 2952 (m), 2928 (m), 1733 (s), 1597 (m), 1504 (s); <sup>1</sup>H NMR (500 MHz, CD<sub>3</sub>Cl)  $\delta$ : 1.42 (d, 3H, *J* = 4.8 Hz), 2.41 (s, 3H), 3.17 (s, 3H), 3.77 (dd, 1H, *J* = 16.0, 6.9 Hz), 3.84 (dd, 1H, *J* = 16.0, 6.9 Hz), 4.19 (d, 1H, *J* = 11.3 Hz), 4.66 (dd, 1H, *J* = 11.3 Hz), 5.13 (app. d, 1H, *J* = 10.1 Hz), 5.20 (app. d, 1H, *J* = 17.1 Hz), 5.27–5.35 (m, 2H), 5.69 (ddt, 1H, *J* = 17.1, 10.1, 6.9 Hz), 5.92–5.95 (m, 2H), 6.68–6.77 (m, 2H), 6.85 (d, 1H, *J* = 1.7 Hz), 7.26 (app. d, 2H, *J* = 8.3 Hz), 7.72 (app. d, 2H, *J* = 8.3 Hz); <sup>13</sup>C NMR (125 MHz, CD<sub>3</sub>Cl)  $\delta$ : 17.7, 21.4, 50.2, 52.0, 55.3, 63.6, 101.0, 108.1, 108.8, 118.1, 122.6, 125.9, 127.8, 129.2, 129.5, 131.8, 134.8, 137.8, 143.1, 147.0, 147.8, 172.6; HRMS (ESI, +ve) *m/z* calcd. for C<sub>24</sub>H<sub>28</sub>NO<sub>6</sub>S 458.1637, found 458.1649 (M+H)<sup>+</sup>.

### Methyl 2-(benzo[d][1,3]dioxol-5-yl)-2-(1-tosyl-2,5-dihydro-1H-pyrrol-2-yl)acetate **13h**

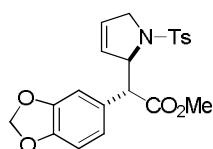

**13h**

*anti-E*-Methyl 3-(*N*-allyl-4-methylphenylsulfonamido)-2-(benzo[d][1,3]dioxol-5-yl)hex-4-enoate **11i** (0.05 g, 0.11 mmol), catalytic Grubbs I and DCM (5 mL) were combined according to general procedure 6 (reaction time : 5 hours). Purification was achieved by the reported procedure to yield methyl 2-(benzo[d][1,3]dioxol-5-yl)-2-(1-tosyl-2,5-dihydro-1H-pyrrol-2-yl)acetate **13h** as a white solid (0.04 g, 89%). M.p. 134–136 °C; FTIR (film/cm<sup>-1</sup>)  $\nu_{\max}$ : 2994 (m), 2946 (m), 2909 (m), 1728 (s), 1598 (m), 1504 (s); <sup>1</sup>H NMR (500 MHz, CD<sub>3</sub>Cl)  $\delta$ : 2.43 (s, 3H), 3.56 (app. ddt, 1H, *J* = 15.0, 5.3, 2.0 Hz), 3.73 (s, 3H), 3.89 (app. dq, 1H, *J* = 15.0, 2.4 Hz), 4.38 (d, 1H, *J* = 4.4 Hz), 4.95–4.99 (m, 1H), 5.49 (app. dq, 1H, *J* = 6.3, 2.1 Hz), 5.77 (app. dq, 1H, *J* = 6.3, 2.1 Hz), 5.94 (app. d, 2H, *J* = 4.7 Hz), 6.70–6.76 (m, 3H), 7.32 (app. d, 2H, *J* = 8.5 Hz), 7.72 (app. d, 2H, *J* = 8.9 Hz); <sup>13</sup>C NMR (125 MHz, CD<sub>3</sub>Cl)  $\delta$ : 21.5, 52.1, 55.6, 55.8, 68.3, 101.0, 107.9, 110.1, 123.7, 127.0, 127.3, 127.6 (x2), 129.8, 134.2, 143.7, 146.9, 147.0, 172.9; HRMS (ESI, +ve) *m/z* calcd. for C<sub>21</sub>H<sub>22</sub>NO<sub>6</sub>S 416.1167, found 416.1168 (M+H)<sup>+</sup>.

## Chirality Transfer Study – Synthesis and Rearrangement of (S)-10e

### (S)-(4-Bromobut-3-yn-2-yloxy)(*tert*-butyl)diphenylsilane

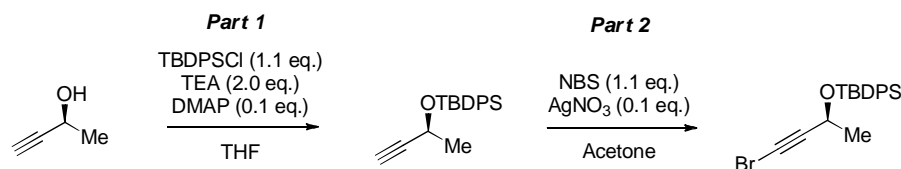

**Part 1** - To a stirred solution of 3-butyn-2-ol (15.0 g, 214 mmol, 1.0 eq.) in THF (200 mL) was added DMAP (2.61 g, 21.4 mmol, 0.1 eq.), TEA (59.1 mL, 428 mmol, 2.0 eq.) and TBDPSCI (64.7 g, 235, 1.1 eq.). The reaction mixture was stirred for 15 hours and then poured onto saturated ammonium chloride (200 mL). The organics were extracted with heptane (3 × 200 mL), concentrated *in vacuo* and the crude product was subjected to flash column chromatography (0-5% EtOAc/Petrol 40-60°) to give (but-3-yn-2-yloxy)(*tert*-butyl)diphenylsilane as a clear oil (66.0 g, 100%).  $[\alpha]_D^{20} = +65.0$  (*c* 1, DCM); Other data as previously reported.

**Part 2** - To a stirred solution of (but-3-yn-2-yloxy)(*tert*-butyl)diphenylsilane (66.0 g, 214 mmol, 1.0 eq.) in acetone (200 mL) was added NBS (41.9 g, 235 mmol, 1.1 eq.) and silver nitrate (3.63 g, 21.4 mmol, 0.1 eq.). The reaction mixture was stirred for 15 hours and then poured onto saturated sodium chloride (100 mL). The organics were extracted with diethyl ether (3 × 200 mL), dried over magnesium sulphate and concentrated *in vacuo* to yield a yellow oil which was triturated with heptane and the insolubilities were filtered off and the mother liquor was concentrated *in vacuo* to yield (4-bromobut-3-yn-2-yloxy)(*tert*-butyl)diphenylsilane as an orange oil (65.0 g, 78%).  $[\alpha]_D^{20} = +10.3$  (*c* 1, DCM); Other data as previously reported.

### (S)-*N*-Allyl-*N*-(3-(*tert*-butyldiphenylsilyloxy)but-1-ynyl)-4-methylbenzenesulfonamide

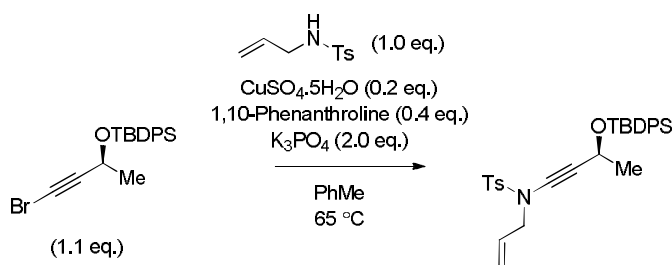

To a solution of *N*-allyl-4-methylbenzenesulfonamide (2.46 g, 11.6 mmol, 1.0 eq.) in toluene (200 mL) was added (*S*)-(4-bromobut-3-yn-2-yloxy)(*tert*-butyl)diphenylsilane (5.00 g, 12.9 mmol, 1.1 eq.), CuSO<sub>4</sub>·5H<sub>2</sub>O (0.58 g, 2.34 mmol, 0.2 eq.), 1,10-phenanthroline (0.84 g, 4.68 mmol, 0.4 eq.) and finely ground K<sub>3</sub>PO<sub>4</sub> (4.97 g, 23.2 mmol, 2 eq.). The reaction mixture was allowed to stir at 65 °C for 48 hours, after which was concentrated *in vacuo* and subjected to flash column chromatography (5–10% EtOAc/Petrol 40–60°) to give (*S*)-*N*-allyl-*N*-(3-(*tert*-butyldiphenylsilyloxy)but-1-ynyl)-4-methylbenzenesulfonamide as a colourless oil (5.05 g, 83%).  $[\alpha]_{\text{D}}^{20} = +20.0$  (*c* 1, DCM); FTIR (film/cm<sup>-1</sup>)  $\nu_{\text{max}}$ : 3036 (m), 3105 (m), 2961 (m), 2932 (m), 1681 (m), 1647 (m), 1619 (s), 1582 (s); <sup>1</sup>H NMR (500 MHz, CDCl<sub>3</sub>)  $\delta$ : 1.06 (s, 9H), 1.41 (d, 3H, *J* = 6.4 Hz), 2.44 (s, 3H), 3.79 (ddt, 1H, *J* = 14.6, 6.3, 1.3 Hz), 3.85 (ddt, 1H, *J* = 14.6, 6.3, 1.3 Hz), 4.61 (app. quin, 1H, *J* = 6.4 Hz), 5.11–5.17 (m, 2H), 5.62 (ddt, 1H, *J* = 17.3, 10.2, 6.3 Hz), 7.28–7.46 (m, 7H), 7.66–7.72 (m, 4H), 7.72–7.77 (m, 2H); <sup>13</sup>C NMR (100 MHz, CDCl<sub>3</sub>)  $\delta$ : 19.1, 21.6, 25.3, 26.5, 26.8, 54.0, 60.1, 73.2, 119.6, 127.4, 127.6, 127.8, 129.6, 131.0, 133.7, 134.8, 135.7, 135.9, 144.4; HRMS (ESI, +ve) *m/z* calcd. for C<sub>30</sub>H<sub>35</sub>NNaO<sub>3</sub>SSi 540.2005, found 540.2209 (M+Na)<sup>+</sup>.

#### ***N*-Allyl-*N*-(3-hydroxy-but-1-ynyl)-4-methyl-benzenesulfonamide**

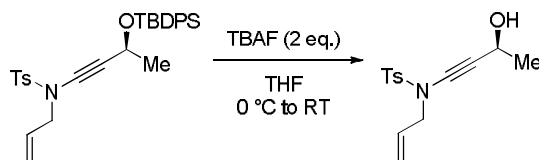

To a solution of *N*-allyl-*N*-(3-(*tert*-butyldiphenylsilyloxy)but-1-ynyl)-4-methylbenzenesulfonamide (3.72 g, 7.20 mmol, 1.0 eq.) in THF (200 mL) at 0 °C was added TBAF (1M soln. in THF, 14.4 mL, 14.4 mmol, 2.0 eq.). The reaction mixture was allowed to stir for 2 hours whilst slowly warming to RT, until complete by TLC, followed by concentration *in vacuo* and subsection to flash column chromatography (10% EtOAc/Petrol 40–60°) to give *N*-allyl-*N*-(3-hydroxy-but-1-ynyl)-4-methylbenzenesulfonamide as a faint yellow oil (1.40 g, 70%).  $[\alpha]_{\text{D}}^{20} = -38.0$  (*c* 1, DCM); FTIR (film/cm<sup>-1</sup>)  $\nu_{\text{max}}$ : 2978 (m), 2929 (m), 1697 (m), 1596 (w). <sup>1</sup>H NMR (400 MHz, CDCl<sub>3</sub>)  $\delta$ : 1.47 (d, 3H, *J* = 6.6 Hz), 2.03 (d, 1H, *J* = 5.2 Hz), 2.49 (s, 3H), 3.93–4.04 (m, 2H), 4.67 (app quin, 1H, *J* = 6.6 Hz), 5.22–5.31 (m, 4H), 5.71 (ddt, 1H, *J* = 17.1, 10.2, 6.4 Hz), 7.39 (d, 2H, *J* = 8.3 Hz), 7.83 (d, 2H, *J* = 8.3 Hz); <sup>13</sup>C NMR (100 MHz, CDCl<sub>3</sub>)  $\delta$ : 21.6, 24.4, 26.5, 54.1, 58.5, 73.1, 120.0, 127.7, 129.7, 130.8, 134.6, 144.8; HRMS (ESI, +ve) *m/z* calcd. for C<sub>14</sub>H<sub>18</sub>NO<sub>3</sub>S 280.1007, found 280.1004 (M+H)<sup>+</sup>.



**(S)-(E)-N-Allyl-N-(3-hydroxybut-1-enyl)-4-methylbenzenesulfonamide**

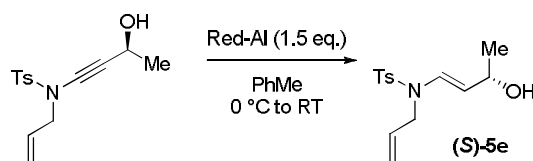

To a solution of (S)-(E)-N-allyl-4-methyl-N-(3-oxobut-1-enyl)benzenesulfonamide (0.10 g, 0.36 mmol, 1.0 eq.) in toluene (5 mL) at 0 °C was added Red-Al (0.11  $\mu$ l, 0.53 mmol, 1.5 eq.) by portionwise addition. The reaction mixture was allowed to stir whilst slowly warming to RT over 4 hours and then was quenched by the addition of Na<sub>2</sub>SO<sub>4</sub>·10H<sub>2</sub>O. After the solution cleared the reaction mixture was filtered through celite and concentrated in vacuo to yield (S)-(E)-N-allyl-N-(3-hydroxybut-1-enyl)-4-methylbenzenesulfonamide as a colourless oil (0.07 g, 76%).  $[\alpha]_{\text{D}}^{20} = -11.0$  (*c* 1, DCM); Other data as previously reported for racemic compound.

**(S,E)-4-(N-allyl-4-methylphenylsulfonamido)but-3-en-2-yl 2-phenylacetate ((S)-10e)**

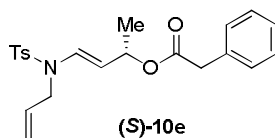

EDCi (0.68 g, 3.55 mmol) in DCM (100 mL), triethylamine (0.49 mL, 3.55 mmol), DMAP (0.02 g, 0.18 mmol), phenylacetic acid (0.48 g, 3.55 mmol) and (S)-(E)-N-allyl-N-(3-hydroxybut-1-enyl)-4-methylbenzenesulfonamide (**(S)-5e**) 0.50 g, 1.78 mmol) in DCM (20 mL) were combined according to general procedure 1 (reaction time: 15 hours). Purification was achieved by reported procedure to afford (S,E)-4-(N-allyl-4-methylphenylsulfonamido)but-3-en-2-yl 2-phenylacetate (**(S)-10e**) as a yellow oil (0.53 g, 74%);  $[\alpha]_{\text{D}}^{20} = -8.0$  (*c* 1, DCM). All data as previously recorded for racemic compound.

---

**(2*R*,3*R*,*E*)-methyl 3-(*N*-allyl-4-methylphenylsulfonamido)-2-phenylhex-4-enoate ((2*R*,3*S*)-11d)**

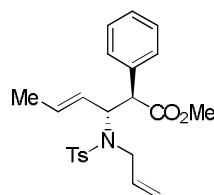

**(2*R*,3*R*)-11d**

LiHMDS (1M in toluene, 0.63 ml, 0.63 mmol), TMSCl (0.19 ml, 2.91 mmol) and (*S,E*)-4-(*N*-allyl-4-methylphenylsulfonamido)but-3-en-2-yl 2-phenylacetate (**S**)-**10e** (0.10 g, 0.48 mmol) in THF (1 ml) was combined according to general procedure 3 (reaction time : 75 minutes). Treatment with diazomethane and purification by flash chromatography afforded (*2R,3R,E*)-methyl 3-(*N*-allyl-4-methylphenylsulfonamido)-2-phenylhex-4-enoate (**S**)-**11d** as a white solid (0.08 g, 71%, d.r. >25:1). M.p. 105–107 °C;  $[\alpha]_{\text{D}}^{20} = -15.0$  (*c* 1, DCM). All other data as previously recorded for racemic compound.

## Initial optimisation Attempts

**Table 1** Propionate Diastereoselectivity Explorations

| Entry | Conditions                                                                       | Yield <b>4a</b> (%) | dr <sup>a</sup> |
|-------|----------------------------------------------------------------------------------|---------------------|-----------------|
| 1     | LiHMDS (1.3 equiv), Me <sub>3</sub> SiCl (1.3 equiv)                             | 72                  | 2:1             |
| 2     | LiHMDS (1.3 equiv), Me <sub>3</sub> SiCl (6 equiv)                               | 70                  | 2:1             |
| 3     | NaHMDS (1.3 equiv), Me <sub>3</sub> SiCl (1.3 equiv)                             | 0 <sup>b</sup>      | -               |
| 4     | KHMDS (1.3 equiv), Me <sub>3</sub> SiCl (1.3 equiv)                              | 0 <sup>c</sup>      | -               |
| 5     | MgHMDS <sub>2</sub> (1.3 equiv), Me <sub>3</sub> SiCl (1.3 equiv)                | 0 <sup>c</sup>      | -               |
| 6     | LDA (1.3 equiv), Me <sub>3</sub> SiCl (1.3 equiv)                                | 0 <sup>c</sup>      | -               |
| 7     | Et <sub>3</sub> N (1.5 equiv), TIPSOTf (1.1 equiv) <sup>d</sup>                  | 0 <sup>c</sup>      | -               |
| 8     | LDA (1.5 equiv), HMPA (5 equiv)CIP(O)(OEt) <sub>2</sub> (1.5 equiv) <sup>e</sup> | 0 <sup>c</sup>      | -               |
| 9     | LiHMDS (1.3 equiv), HMPA (23%), Me <sub>3</sub> SiCl (1.3 equiv) <sup>f</sup>    | 0 <sup>c</sup>      | -               |
| 10    | LiHMDS (1.3 equiv), HMPA (23%), Me <sub>3</sub> SiCl (1.3 equiv) <sup>g</sup>    | 0 <sup>b</sup>      | -               |

<sup>a</sup> *anti/syn*, measured by <sup>1</sup>H NMR analysis of crude reaction mixtures. <sup>b</sup> Allylic alcohol **5a** recovered (99%). <sup>c</sup> Intractable mixture. <sup>d</sup> In CH<sub>2</sub>Cl<sub>2</sub> at 20 °C. <sup>e</sup> Reaction conducted -78 °C → -10 °C and quenched with MeOH. <sup>f</sup> Quenched with 1:1 1M HCl(aq.)/brine. <sup>g</sup> Quenched with MeOH.

## NMR Spectra

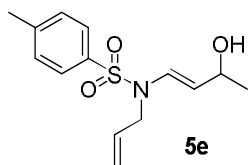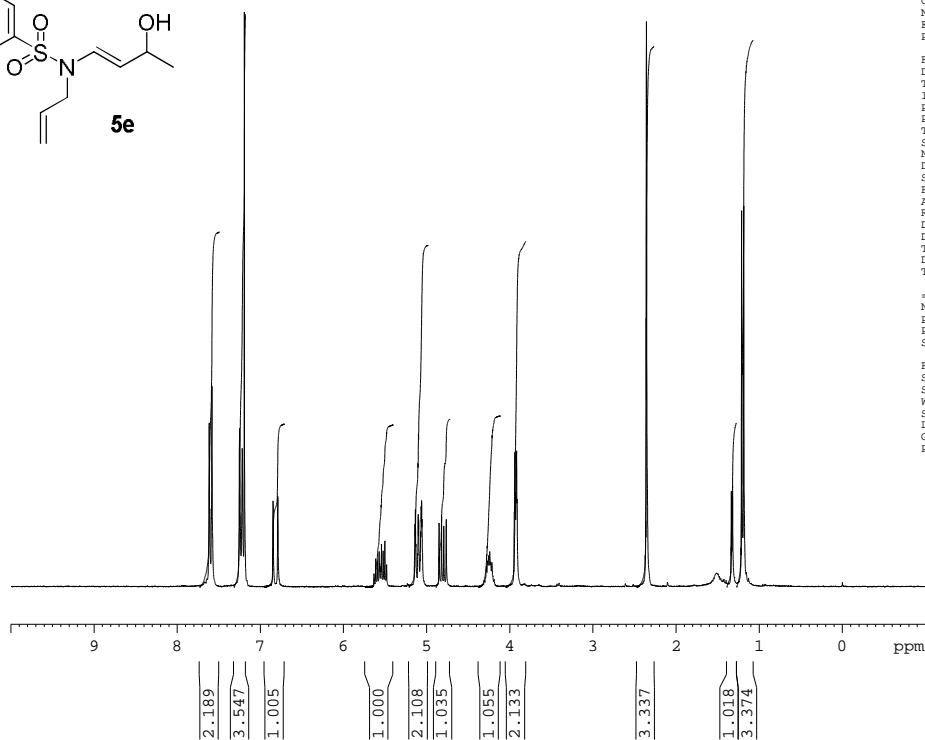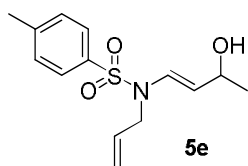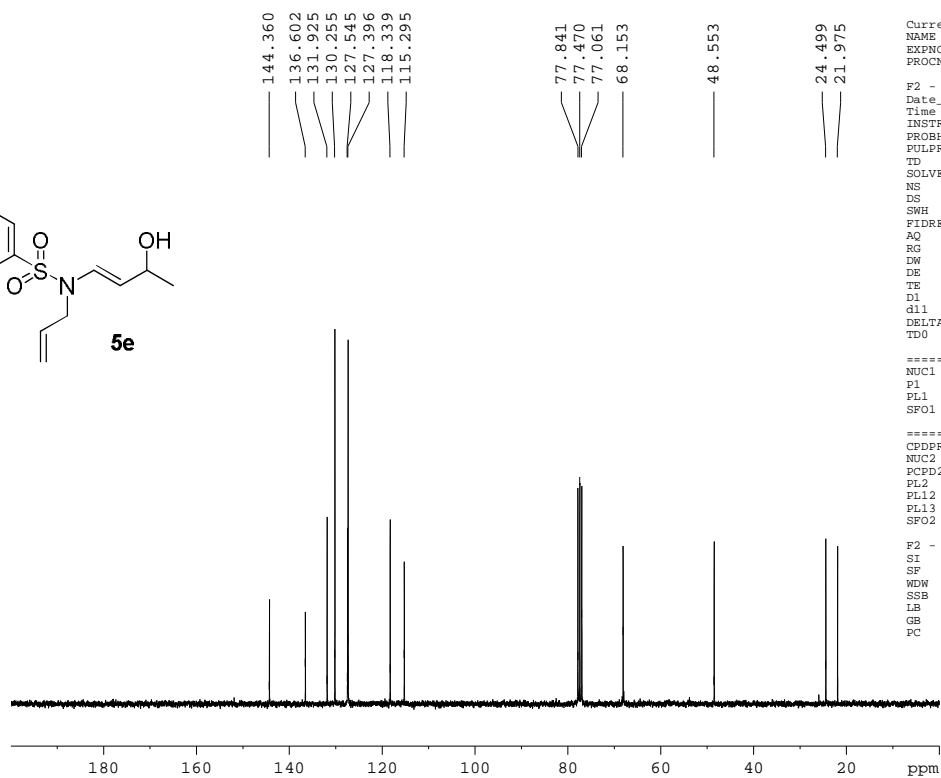

WH4-063-A1

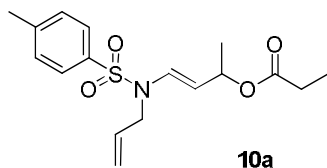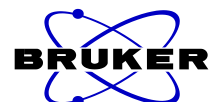

Current Data Parameters  
 NAME WH4-063-A1-Retake  
 EXPNO 1  
 PROCNO 1

F2 - Acquisition Parameters  
 Date\_ 20081107  
 Time 14.25  
 INSTRUM spect  
 PROBHD 5 mm PABBO BB/  
 PULPROG zg30  
 TD 65536  
 SOLVENT CDCl3  
 NS 8  
 DS 0  
 SWH 10330.578 Hz  
 FIDRES 0.157632 Hz  
 AQ 3.1719923 sec  
 RG 45.2  
 DW 48.400 usec  
 DE 6.00 usec  
 TE 298.0 K  
 D1 1.0000000 sec  
 TD0 1

===== CHANNEL f1 =====  
 NUC1 1H  
 P1 9.50 usec  
 PL1 -1.00 dB  
 SFO1 500.1330885 MHz

F2 - Processing parameters  
 SI 32768  
 SF 500.1300000 MHz  
 WDW no  
 SSB 0  
 LB 0.00 Hz  
 GB 0  
 PC 1.00

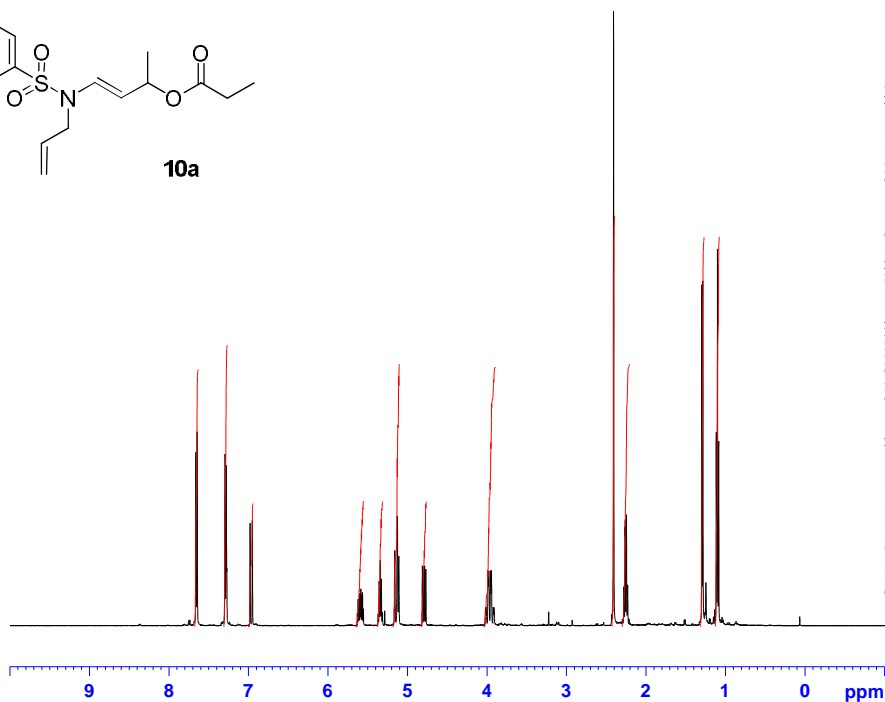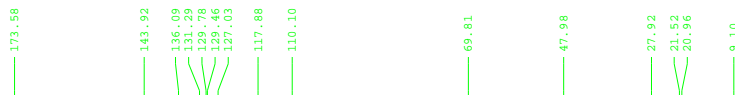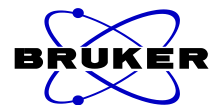

Current Data Parameters  
 NAME WH4-063-A1  
 EXPNO 2  
 PROCNO 1

F2 - Acquisition Parameters  
 Date\_ 20081107  
 Time 14.20  
 INSTRUM spect  
 PROBHD 5 mm PABBO BB/  
 PULPROG zgpg30  
 TD 65536  
 SOLVENT CDCl3  
 NS 65  
 DS 4  
 SWH 29761.904 Hz  
 FIDRES 0.454131 Hz  
 AQ 1.1010548 sec  
 RG 362  
 DW 16.800 usec  
 DE 6.00 usec  
 TE 298.0 K  
 D1 2.0000000 sec  
 d11 0.0300000 sec  
 DELTA 1.8999998 sec  
 TD0 1

===== CHANNEL f1 =====  
 NUC1 13C  
 P1 7.50 usec  
 PL1 0.34 dB  
 SFO1 125.7703643 MHz

===== CHANNEL f2 =====  
 CPDPRG2 waltz16  
 NUC2 1H  
 PCPD2 80.00 usec  
 PL12 17.98 dB  
 PL13 20.00 dB  
 PL2 -1.00 dB  
 SFO2 500.1320005 MHz

F2 - Processing parameters  
 SI 32768  
 SF 125.7577890 MHz  
 WDW EM  
 SSB 0  
 LB 1.00 Hz  
 GB 0  
 PC 1.40

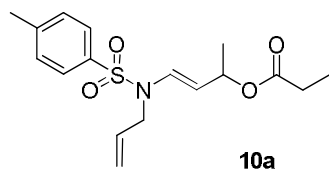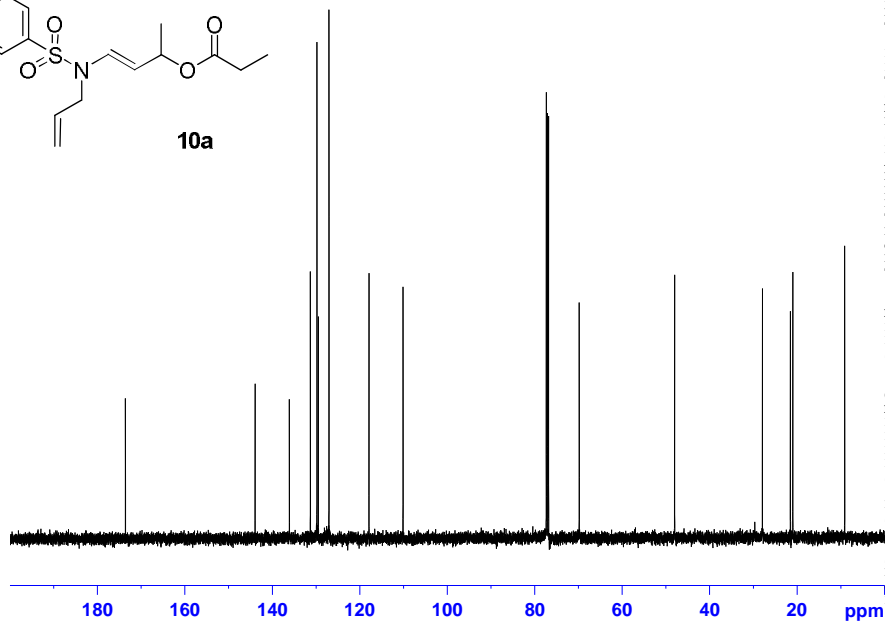

WH9-097-B1

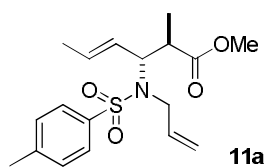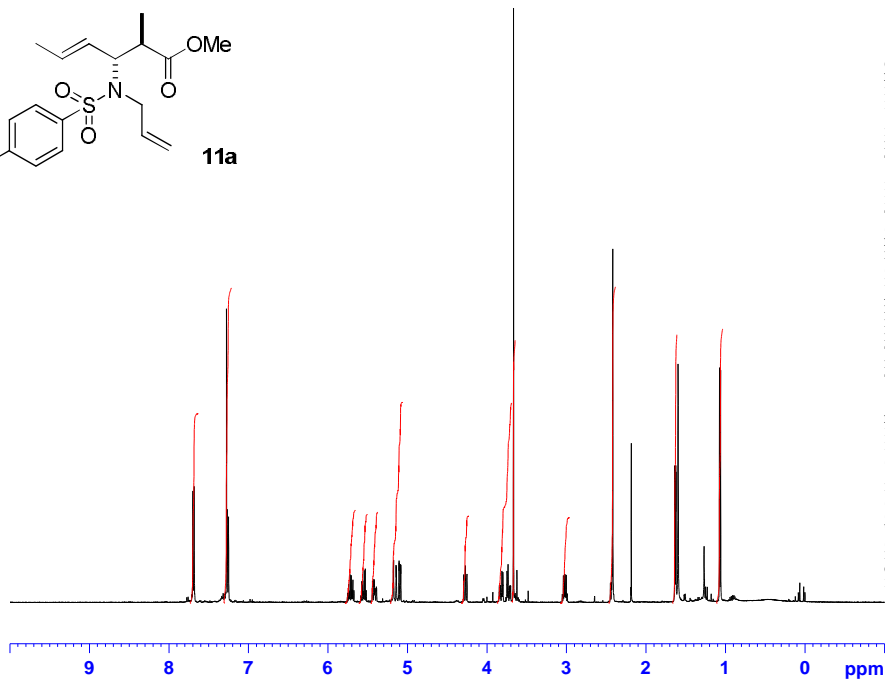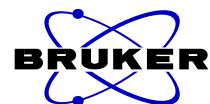

Current Data Parameters  
 NAME WH9-097-B1  
 EXPNO 2  
 PROCNO 1

F2 - Acquisition Parameters  
 Date\_ 20100906  
 Time\_ 13.11  
 INSTRUM spect  
 PROBHD 5 mm PABBO BB/  
 PULPROG zg30  
 TD 65536  
 SOLVENT CDCl3  
 NS 8  
 DS 0  
 SWH 10330.578 Hz  
 FIDRES 0.157632 Hz  
 AQ 3.1719923 sec  
 RG 362  
 DW 48.400 usec  
 DE 6.00 usec  
 TE 298.0 K  
 D1 1.0000000 sec  
 TD0 1

===== CHANNEL f1 =====  
 NUC1 1H  
 P1 9.50 usec  
 PL1 -1.00 dB  
 SFO1 500.1330885 MHz

F2 - Processing parameters  
 SI 32768  
 SF 500.1300000 MHz  
 WDW no  
 SSB 0  
 LB 0.00 Hz  
 GB 0  
 PC 1.00

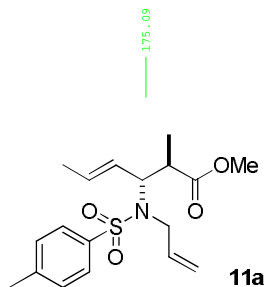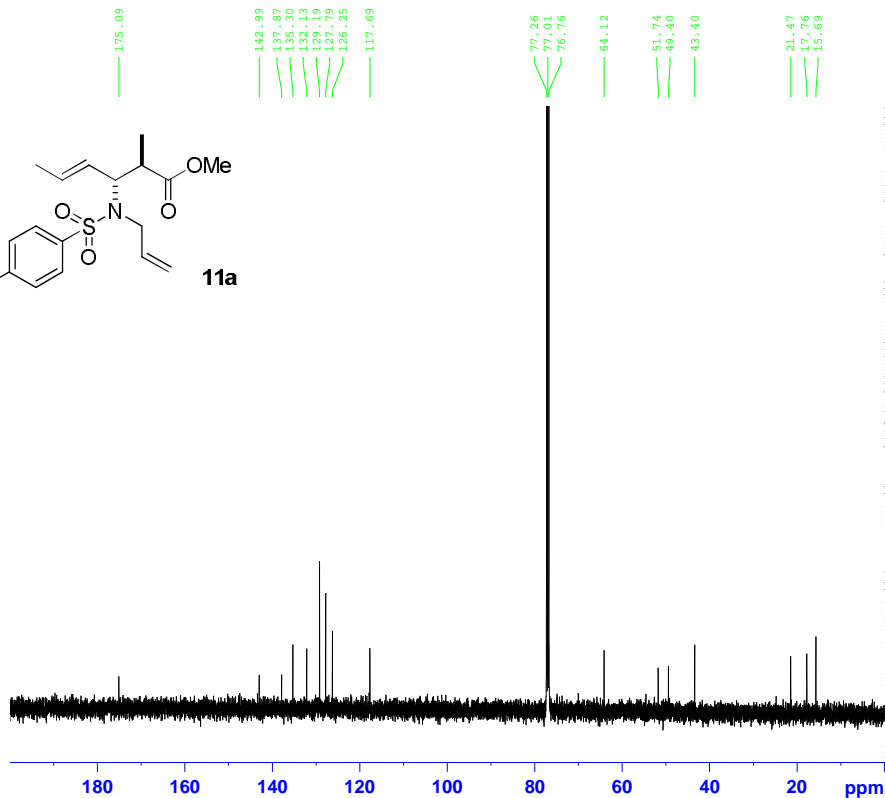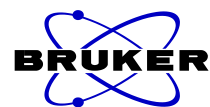

Current Data Parameters  
 NAME WH9-097-B1  
 EXPNO 3  
 PROCNO 1

F2 - Acquisition Parameters  
 Date\_ 20100906  
 Time\_ 13.21  
 INSTRUM spect  
 PROBHD 5 mm PABBO BB/  
 PULPROG zgpg30  
 TD 65536  
 SOLVENT CDCl3  
 NS 128  
 DS 4  
 SWH 29761.904 Hz  
 FIDRES 0.454131 Hz  
 AQ 1.1010548 sec  
 RG 362  
 DW 16.800 usec  
 DE 6.00 usec  
 TE 298.0 K  
 D1 2.0000000 sec  
 d11 0.0300000 sec  
 DELTA 1.8999998 sec  
 TD0 1

===== CHANNEL f1 =====  
 NUC1 13C  
 P1 7.50 usec  
 PL1 0.34 dB  
 SFO1 125.7703643 MHz

===== CHANNEL f2 =====  
 CPDPRG2 waltz16  
 NUC2 1H  
 PCPD2 80.00 usec  
 PL12 17.98 dB  
 PL13 20.00 dB  
 PL2 -1.00 dB  
 SFO2 500.1320005 MHz

F2 - Processing parameters  
 SI 32768  
 SF 125.7577890 MHz  
 WDW EM  
 SSB 0  
 LB 1.00 Hz  
 GB 0  
 PC 1.40

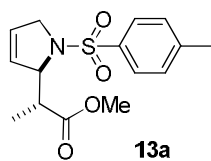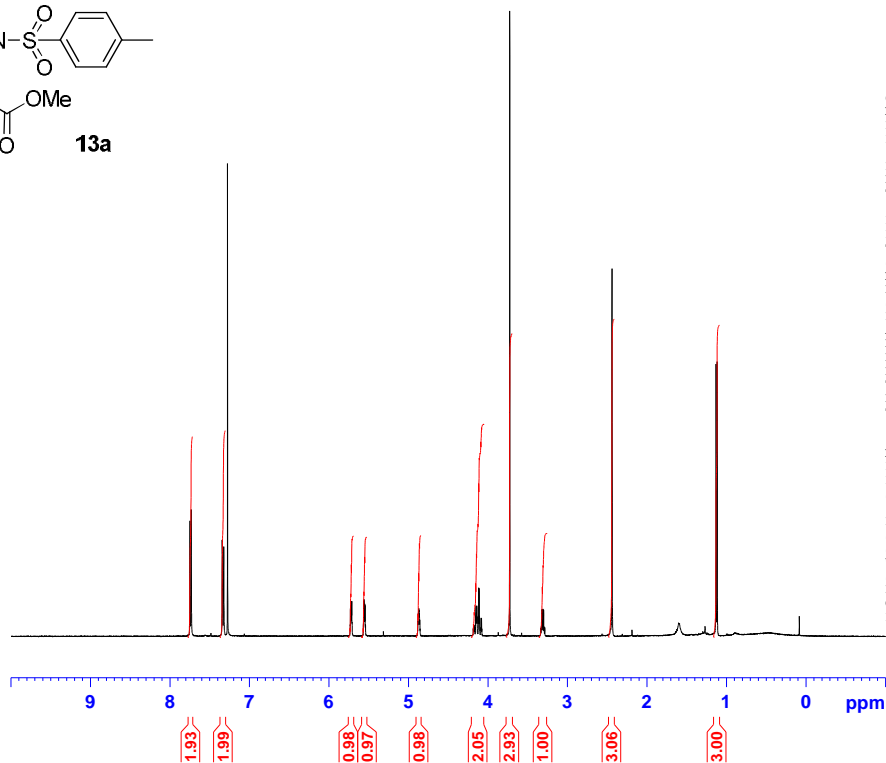

Current Data Parameters  
 NAME WH9-149-B2  
 EXPNO 1  
 PROCNO 1

F2 - Acquisition Parameters  
 Date\_ 20100915  
 Time\_ 11.25  
 INSTRUM spect  
 PROBHD 5 mm PABBO BB/  
 PULPROG zg30  
 TD 65536  
 SOLVENT CDCl3  
 NS 8  
 DS 0  
 SWH 10330.578 Hz  
 FIDRES 0.157632 Hz  
 AQ 3.1719923 sec  
 RG 512  
 DW 48.400 usec  
 DE 6.00 usec  
 TE 294.4 K  
 D1 1.0000000 sec  
 TD0 1

==== CHANNEL f1 =====  
 NUC1 1H  
 P1 9.50 usec  
 PL1 -1.00 dB  
 SFO1 500.1330885 MHz

F2 - Processing parameters  
 SI 32768  
 SF 500.1300000 MHz  
 WDW no  
 SSB 0  
 LB 0.00 Hz  
 GB 0  
 PC 1.00

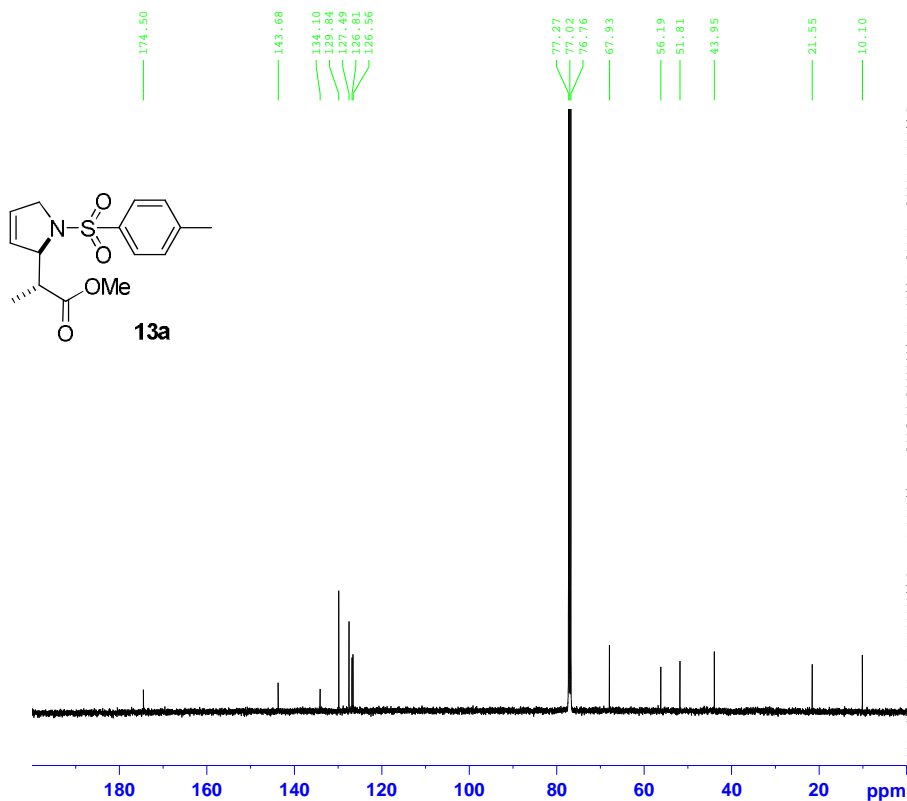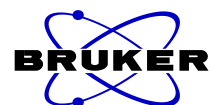

Current Data Parameters  
 NAME WH9-149-B2  
 EXPNO 3  
 PROCNO 1

F2 - Acquisition Parameters  
 Date\_ 20100915  
 Time\_ 12.30  
 INSTRUM spect  
 PROBHD 5 mm PABBO BB/  
 PULPROG zgpg30  
 TD 65536  
 SOLVENT CDCl3  
 NS 1191  
 DS 4  
 SWH 29761.904 Hz  
 FIDRES 0.454131 Hz  
 AQ 1.1010548 sec  
 RG 362  
 DW 16.800 usec  
 DE 6.00 usec  
 TE 295.5 K  
 D1 2.0000000 sec  
 d11 0.0300000 sec  
 DELTA 1.8999998 sec  
 TD0 1

==== CHANNEL f1 =====  
 NUC1 13C  
 P1 7.50 usec  
 PL1 0.34 dB  
 SFO1 125.7703643 MHz

==== CHANNEL f2 =====  
 CPDPRG2 waltz16  
 NUC2 1H  
 PCPD2 80.00 usec  
 PL12 17.98 dB  
 PL13 20.00 dB  
 PL2 -1.00 dB  
 SFO2 500.1320005 MHz

F2 - Processing parameters  
 SI 32768  
 SF 125.7577890 MHz  
 WDW EM  
 SSB 0  
 LB 1.00 Hz  
 GB 0  
 PC 1.40

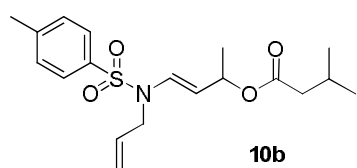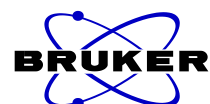

Current Data Parameters  
 NAME WH9-043-B1  
 EXPNO 1  
 PROCNO 1

F2 - Acquisition Parameters  
 Date\_ 20100820  
 Time\_ 15.57  
 INSTRUM spect  
 PROBHD 5 mm PABBO BB/  
 PULPROG zg30  
 TD 65536  
 SOLVENT CD2Cl2  
 NS 8  
 DS 0  
 SWH 10330.578 Hz  
 FIDRES 0.157632 Hz  
 AQ 3.1719923 sec  
 RG 22.6  
 DW 48.400 usec  
 DE 6.00 usec  
 TE 294.4 K  
 D1 1.0000000 sec  
 TDO 1

===== CHANNEL f1 =====  
 NUC1 1H  
 P1 9.50 usec  
 PL1 -1.00 dB  
 SFO1 500.1330885 MHz

F2 - Processing parameters  
 SI 32768  
 SF 500.1300000 MHz  
 WDW no  
 SSB 0  
 LB 0.00 Hz  
 GB 0  
 PC 1.00

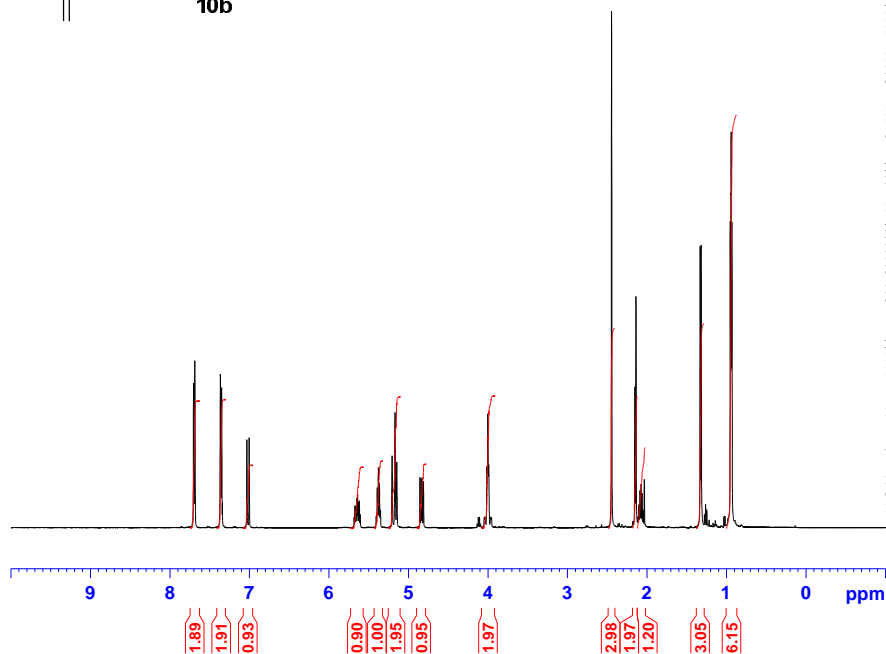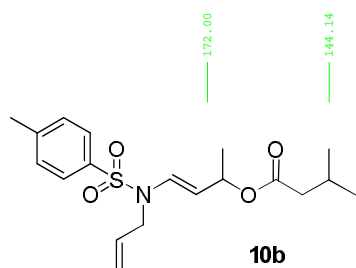

Current Data Parameters  
 NAME WH9-043-B1  
 EXPNO 2  
 PROCNO 1

F2 - Acquisition Parameters  
 Date\_ 20100820  
 Time\_ 16.03  
 INSTRUM spect  
 PROBHD 5 mm PABBO BB/  
 PULPROG zgpg30  
 TD 65536  
 SOLVENT CD2Cl2  
 NS 93  
 DS 4  
 SWH 29761.904 Hz  
 FIDRES 0.454131 Hz  
 AQ 1.1010548 sec  
 RG 362  
 DW 16.800 usec  
 DE 6.00 usec  
 TE 295.7 K  
 D1 2.0000000 sec  
 d11 0.0300000 sec  
 DELTA 1.89999998 sec  
 TDO 1

===== CHANNEL f1 =====  
 NUC1 13C  
 P1 7.50 usec  
 PL1 0.34 dB  
 SFO1 125.7703643 MHz

===== CHANNEL f2 =====  
 CPDPRG2 waltz16  
 NUC2 1H  
 PCPD2 80.00 usec  
 PL12 17.98 dB  
 PL13 20.00 dB  
 PL2 -1.00 dB  
 SFO2 500.1320005 MHz

F2 - Processing parameters  
 SI 32768  
 SF 125.7577890 MHz  
 WDW EM  
 SSB 0  
 LB 1.00 Hz  
 GB 0  
 PC 1.40

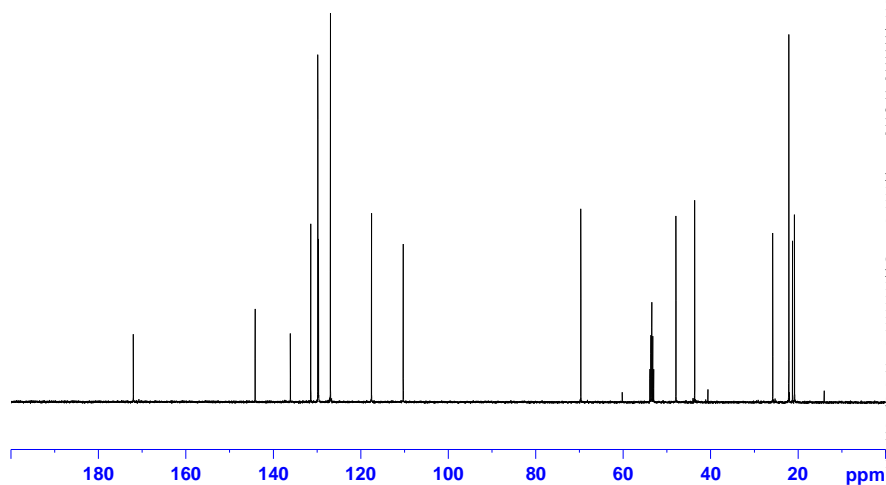



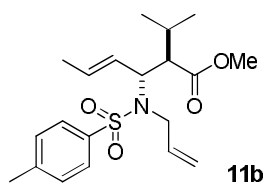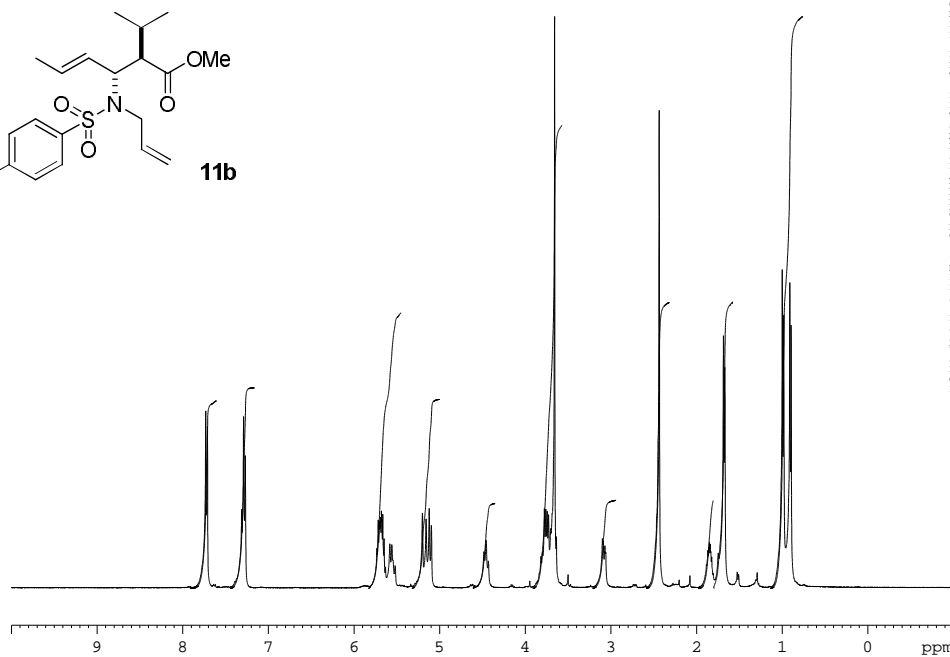

```

Current Data Parameters
NAME      WH9-103-B1
EXPNO    1
PROCNO   1

F2 - Acquisition Parameters
Date_    20100907
Time     13.02
INSTRUM spect
PROBHD   5 mm PABBO BB-
PULPROG zg30
TD       65536
SOLVENT  CDCl3
NS       8
DS       0
SWH      8278.146 Hz
FIDRES   0.126314 Hz
AQ       3.9584243 sec
RG       57
DW       60.400 usec
DE       6.00 usec
TE       298.0 K
D1       1.0000000 sec
D11      1
TDO      1

===== CHANNEL f1 =====
NUC1     1H
P1       10.75 usec
PL1     0.00 dB
SFO1    400.1324710 MHz

F2 - Processing parameters
SI       32768
SF       400.1300000 MHz
WDW      no
SSB      0
LB       0.00 Hz
GB       0
PC       1.00
    
```

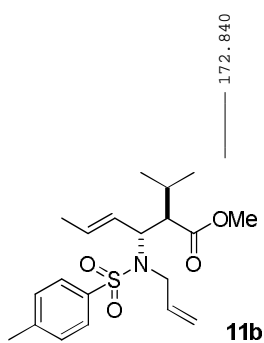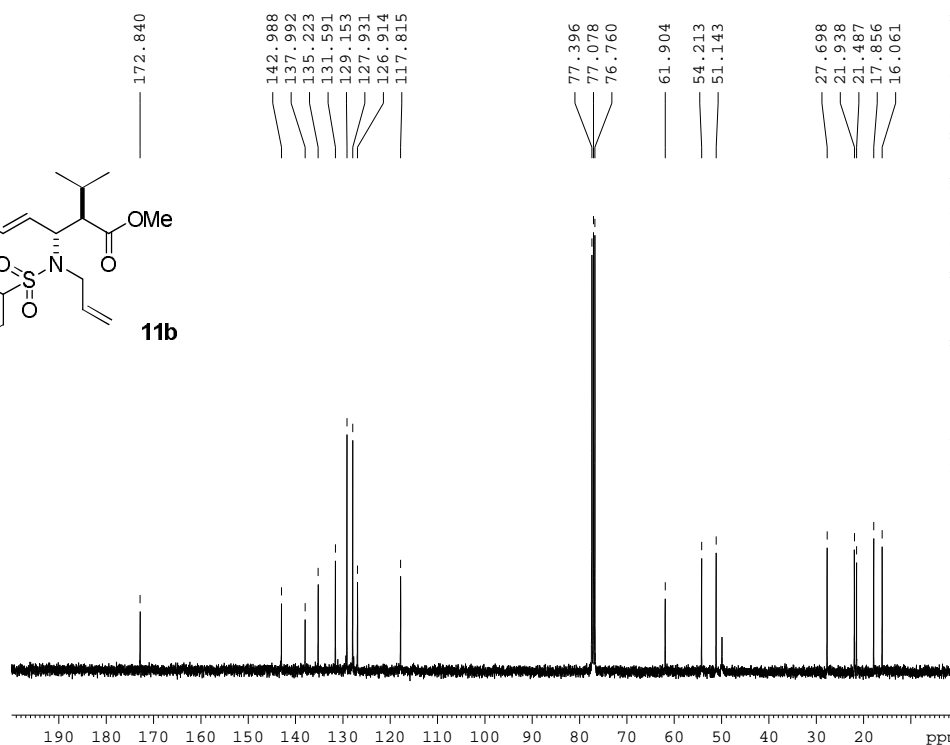

```

Current Data Parameters
NAME      WH9-103-B1
EXPNO    2
PROCNO   1

F2 - Acquisition Parameters
Date_    20100907
Time     13.09
INSTRUM spect
PROBHD   5 mm PABBO BB-
PULPROG zgpg30
TD       65536
SOLVENT  CDCl3
NS       4
DS       4
SWH      23980.814 Hz
FIDRES   0.365918 Hz
AQ       1.3664756 sec
RG       16384
DW       20.850 usec
DE       6.00 usec
TE       298.0 K
D1       2.0000000 sec
D11      0.0300000 sec
TDO      1

===== CHANNEL f1 =====
NUC1     13C
P1       7.30 usec
PL1     0.00 dB
SFO1    100.6228298 MHz

===== CHANNEL f2 =====
CPDPRG2 waltz16
NUC2     1H
PCPD2   80.00 usec
PL2     0.00 dB
PL12    17.23 dB
PL13    20.00 dB
SFO2    400.1316005 MHz

F2 - Processing parameters
SI       32768
SF       100.6127690 MHz
WDW      EM
SSB      0
LB       1.00 Hz
GB       0
PC       1.40
    
```

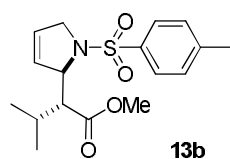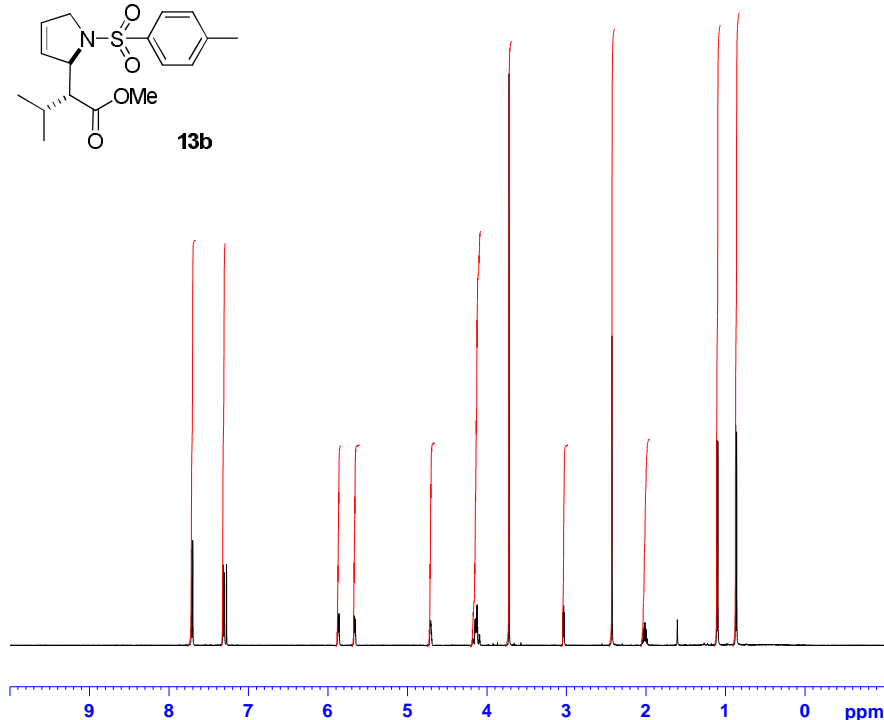

Current Data Parameters  
 NAME WH9-155-2-B1  
 EXPNO 2  
 PROCNO 1

F2 - Acquisition Parameters  
 Date\_ 20100916  
 Time\_ 18.07  
 INSTRUM spect  
 PROBHD 5 mm PABBO BB/  
 PULPROG zg30  
 TD 65536  
 SOLVENT CDCl3  
 NS 8  
 DS 0  
 SWH 10330.578 Hz  
 FIDRES 0.157632 Hz  
 AQ 3.1719923 sec  
 RG 256  
 DW 48.400 usec  
 DE 6.00 usec  
 TE 298.0 K  
 D1 1.0000000 sec  
 TD0 1

===== CHANNEL f1 =====  
 NUC1 1H  
 P1 9.50 usec  
 PL1 -1.00 dB  
 SFO1 500.1330885 MHz

F2 - Processing parameters  
 SI 32768  
 SF 500.1300000 MHz  
 WDW no  
 SSB 0  
 LB 0.00 Hz  
 GB 0  
 PC 1.00

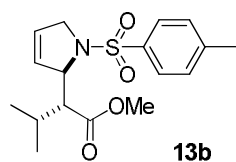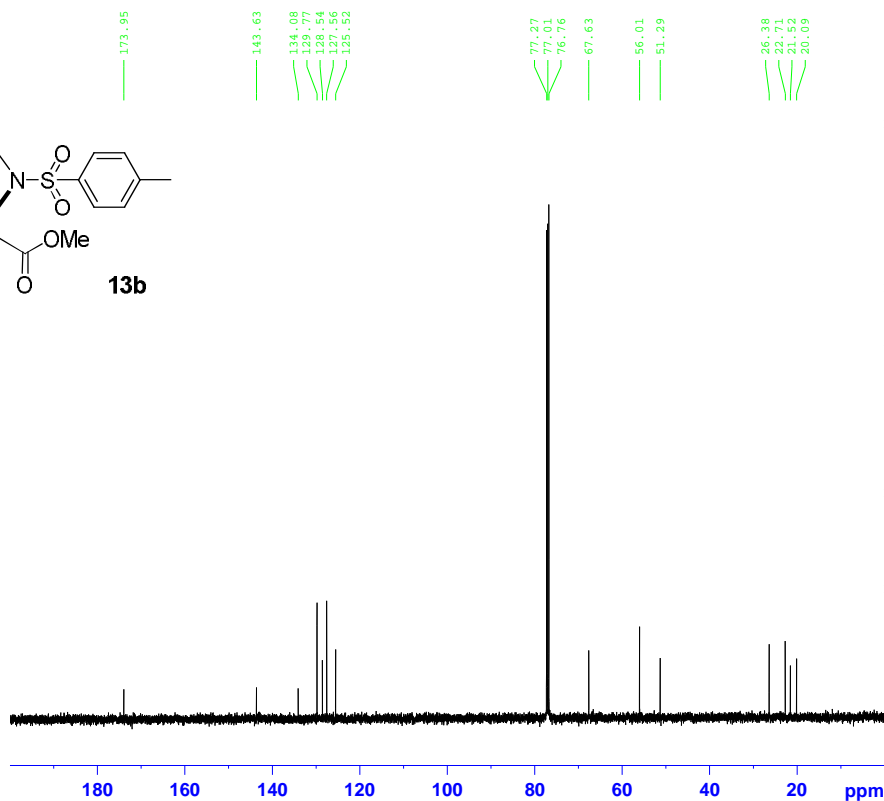

Current Data Parameters  
 NAME WH9-155-2-B1  
 EXPNO 3  
 PROCNO 1

F2 - Acquisition Parameters  
 Date\_ 20100916  
 Time\_ 18.09  
 INSTRUM spect  
 PROBHD 5 mm PABBO BB/  
 PULPROG zgpg30  
 TD 65536  
 SOLVENT CDCl3  
 NS 60  
 DS 4  
 SWH 29761.904 Hz  
 FIDRES 0.454131 Hz  
 AQ 1.1010548 sec  
 RG 322  
 DW 16.800 usec  
 DE 6.00 usec  
 TE 298.0 K  
 D1 2.0000000 sec  
 d11 0.0300000 sec  
 DELTA 1.8999998 sec  
 TD0 1

===== CHANNEL f1 =====  
 NUC1 13C  
 P1 7.50 usec  
 PL1 0.34 dB  
 SFO1 125.7703643 MHz

===== CHANNEL f2 =====  
 CPDPRG2 waltz16  
 NUC2 1H  
 PCPD2 80.00 usec  
 PL12 17.98 dB  
 PL13 20.00 dB  
 PL2 -1.00 dB  
 SFO2 500.1320005 MHz

F2 - Processing parameters  
 SI 32768  
 SF 125.7577890 MHz  
 WDW EM  
 SSB 0  
 LB 1.00 Hz  
 GB 0  
 PC 1.40

WH9-065-A1

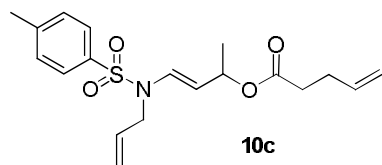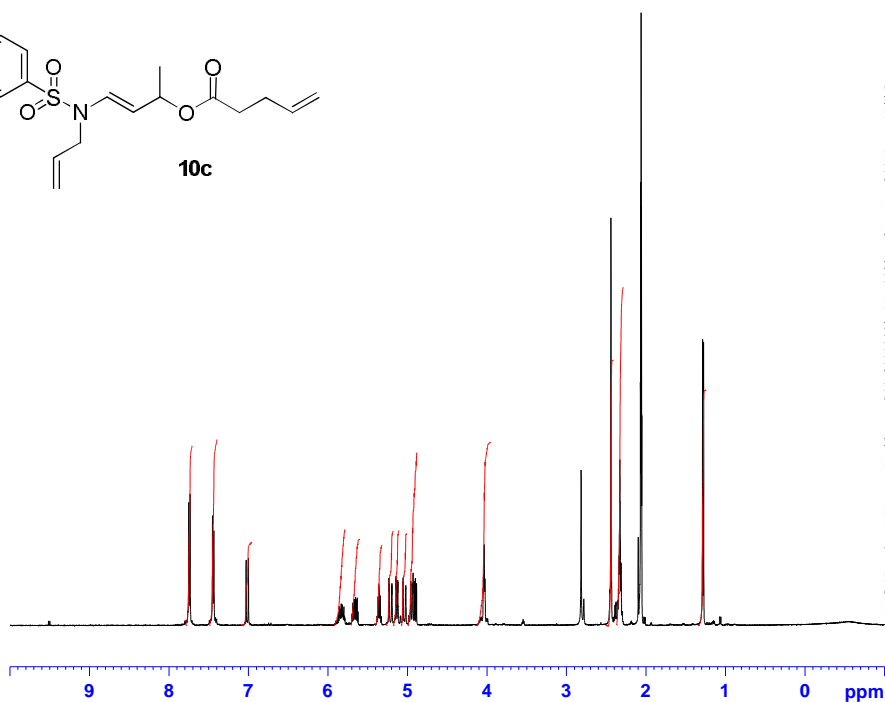

Current Data Parameters  
 NAME WH9-065-A1  
 EXPNO 1  
 PROCNO 1

F2 - Acquisition Parameters  
 Date\_ 20100825  
 Time\_ 17.09  
 INSTRUM spect  
 PROBHD 5 mm PABBO BB/  
 PULPROG zg30  
 TD 65536  
 SOLVENT Acetone  
 NS 8  
 DS 0  
 SWH 10330.578 Hz  
 FIDRES 0.157632 Hz  
 AQ 3.1719923 sec  
 RG 362  
 DW 48.400 usec  
 DE 6.00 usec  
 TE 298.0 K  
 D1 1.0000000 sec  
 TD0 1

===== CHANNEL f1 =====  
 NUC1 1H  
 P1 9.50 usec  
 PL1 -1.00 dB  
 SFO1 500.1330885 MHz

F2 - Processing parameters  
 SI 32768  
 SF 500.1300000 MHz  
 WDW no  
 SSB 0  
 LB 0.00 Hz  
 GB 0  
 PC 1.00

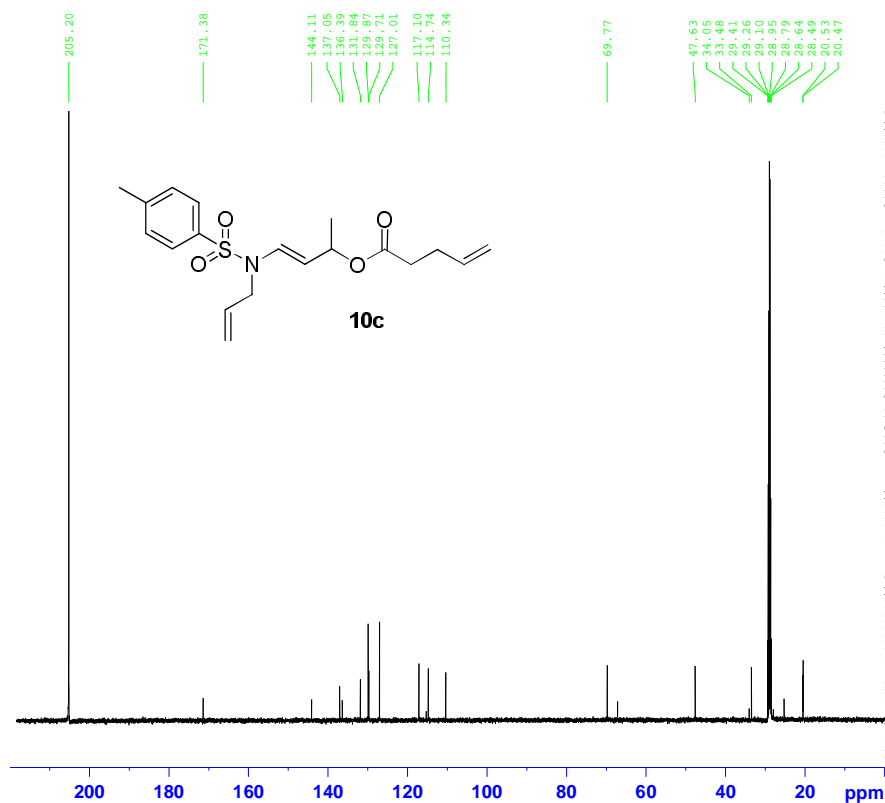

Current Data Parameters  
 NAME WH9-107-A1  
 EXPNO 2  
 PROCNO 1

F2 - Acquisition Parameters  
 Date\_ 20100907  
 Time\_ 13.59  
 INSTRUM spect  
 PROBHD 5 mm PABBO BB/  
 PULPROG zgpg30  
 TD 65536  
 SOLVENT Acetone  
 NS 77  
 DS 4  
 SWH 29761.904 Hz  
 FIDRES 0.454131 Hz  
 AQ 1.1010548 sec  
 RG 362  
 DW 16.800 usec  
 DE 6.00 usec  
 TE 298.0 K  
 D1 2.0000000 sec  
 d11 0.0300000 sec  
 DELTA 1.8999998 sec  
 TD0 1

===== CHANNEL f1 =====  
 NUC1 13C  
 P1 7.50 usec  
 PL1 0.34 dB  
 SFO1 125.7703643 MHz

===== CHANNEL f2 =====  
 CPDPRG2 waltz16  
 NUC2 1H  
 PCPD2 80.00 usec  
 PL12 17.98 dB  
 PL13 20.00 dB  
 PL2 -1.00 dB  
 SFO2 500.1320005 MHz

F2 - Processing parameters  
 SI 32768  
 SF 125.7577890 MHz  
 WDW EM  
 SSB 0  
 LB 1.00 Hz  
 GB 0  
 PC 1.40

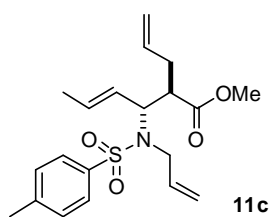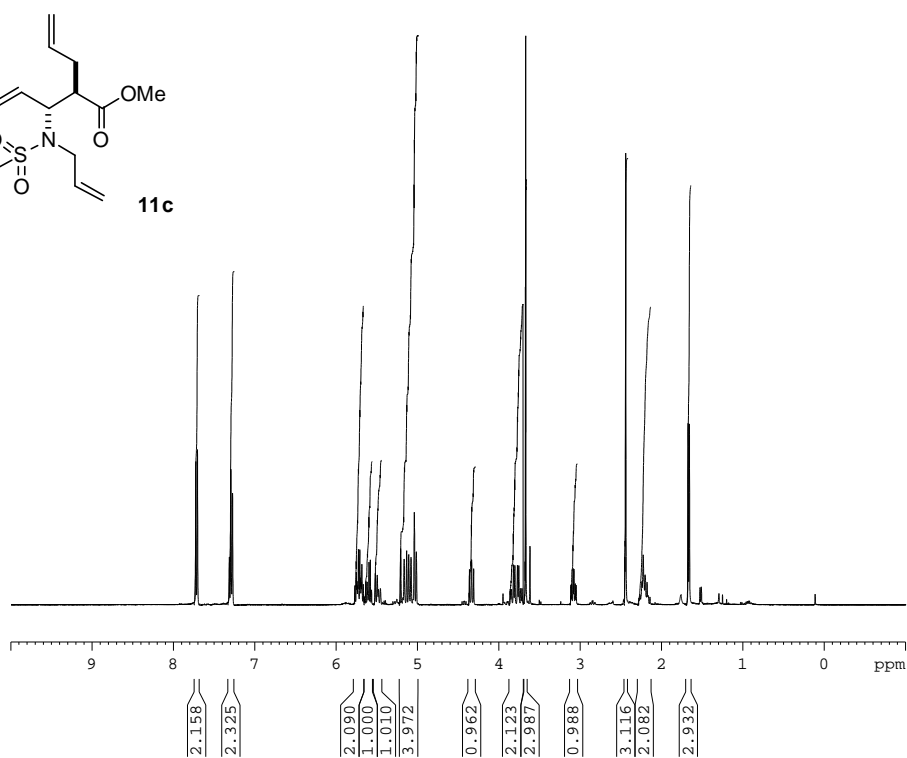

```
Current Data Parameters
NAME      WH9-113-B1
EXPNO    1
PROCNO   1

F2 - Acquisition Parameters
Date_    20100908
Time     13.59
INSTRUM spect
PROBHD   5 mm PABBO BB-
PULPROG zg30
TD       65536
SOLVENT  CDCl3
NS       15
DS       0
SWH      8278.146 Hz
FIDRES   0.126314 Hz
AQ       3.9584243 sec
RG       67
DW       60.400 usec
DE       6.00 usec
TE       298.0 K
D1       1.0000000 sec
TDO      1
```

```
***** CHANNEL f1 *****
NUC1     1H
P1       10.75 usec
PL1      0.00 dB
SFO1     400.1324710 MHz
```

```
F2 - Processing parameters
SI       32768
SF       400.1300000 MHz
WDW      no
SSB      0
LB       0.00 Hz
GB       0
PC       1.00
```

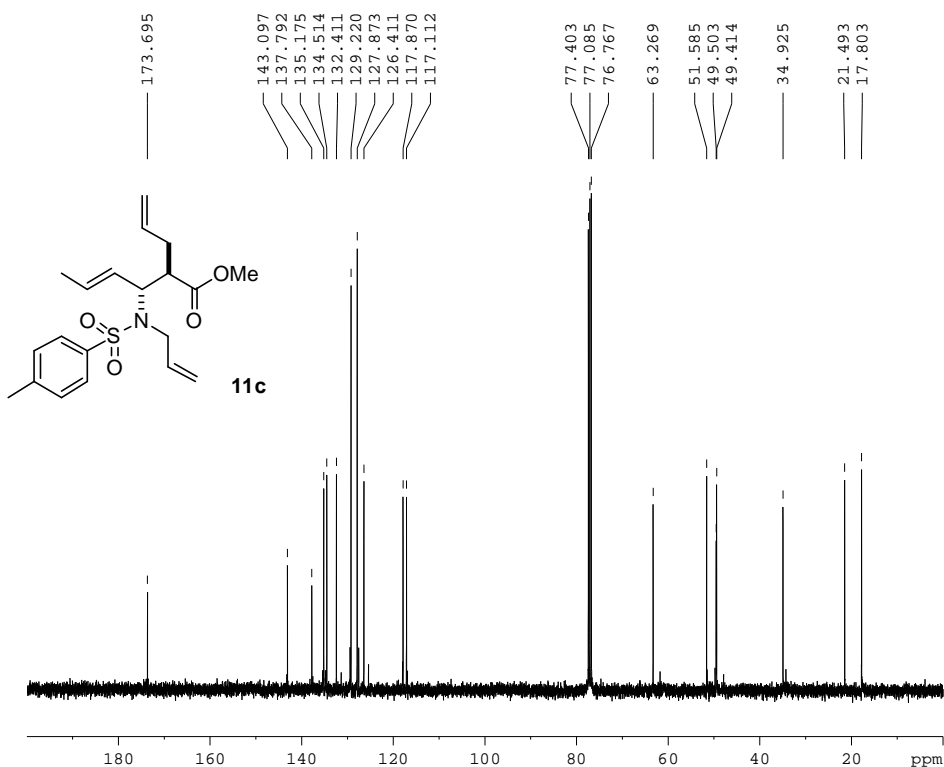

```
Current Data Parameters
NAME      WH9-113-B1
EXPNO    2
PROCNO   1
```

```
F2 - Acquisition Parameters
Date_    20100908
Time     13.08
INSTRUM spect
PROBHD   5 mm PABBO BB-
PULPROG zgpg30
TD       65536
SOLVENT  CDCl3
NS       110
DS       4
SWH      23980.814 Hz
FIDRES   0.365916 Hz
AQ       1.3664756 sec
RG       16384
DW       20.850 usec
DE       6.00 usec
TE       298.0 K
D1       2.0000000 sec
D11      0.0300000 sec
TDO      1
```

```
***** CHANNEL f1 *****
NUC1     13C
P1       7.30 usec
PL1      0.00 dB
SFO1     100.6228298 MHz
```

```
***** CHANNEL f2 *****
CPDPRG2 waltz16
NUC2     1H
PCPD2   80.00 usec
PL2     0.00 dB
PL12    17.23 dB
PL13    20.00 dB
SFO2    400.1316005 MHz
```

```
F2 - Processing parameters
SI       32768
SF       100.6127690 MHz
WDW      EM
SSB      0
LB       1.00 Hz
GB       0
PC       1.40
```

WH9-061-A1

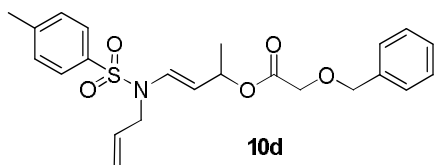

10d

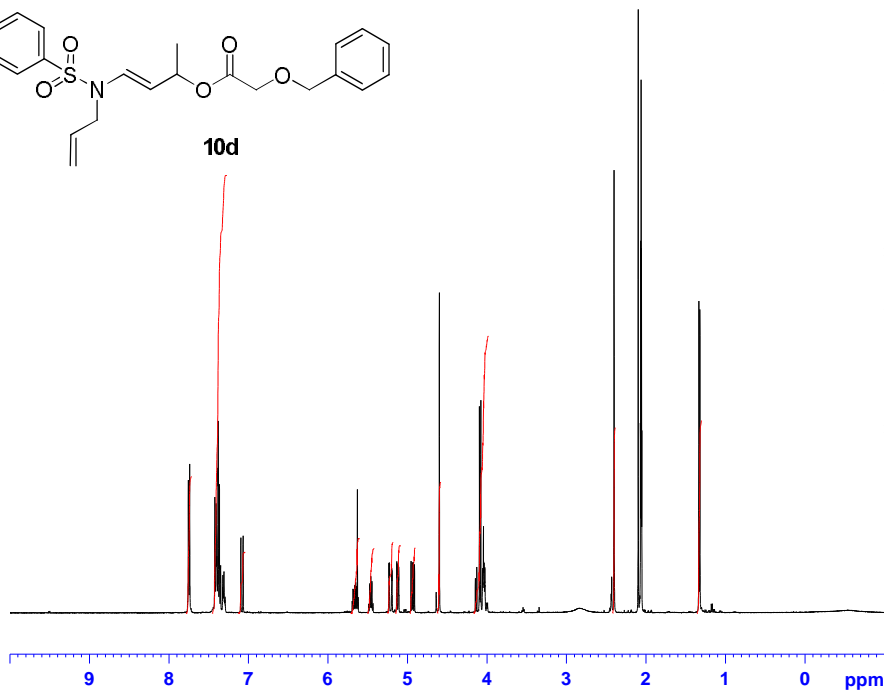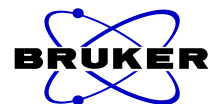

Current Data Parameters  
 NAME WH9-061-A1  
 EXPNO 1  
 PROCNO 1

F2 - Acquisition Parameters  
 Date\_ 20100826  
 Time 11.18  
 INSTRUM spect  
 PROBHD 5 mm PABBO BB/  
 PULPROG zg30  
 TD 65536  
 SOLVENT Acetone  
 NS 8  
 DS 0  
 SWH 10330.578 Hz  
 FIDRES 0.157632 Hz  
 AQ 3.1719923 sec  
 RG 287  
 DW 48.400 usec  
 DE 6.00 usec  
 TE 298.0 K  
 D1 1.0000000 sec  
 TD0 1

==== CHANNEL f1 =====  
 NUC1 1H  
 P1 9.50 usec  
 PL1 -1.00 dB  
 SFO1 500.1330885 MHz

F2 - Processing parameters  
 SI 32768  
 SF 500.1300000 MHz  
 WDW no  
 SSB 0  
 LB 0.00 Hz  
 GB 0  
 PC 1.00

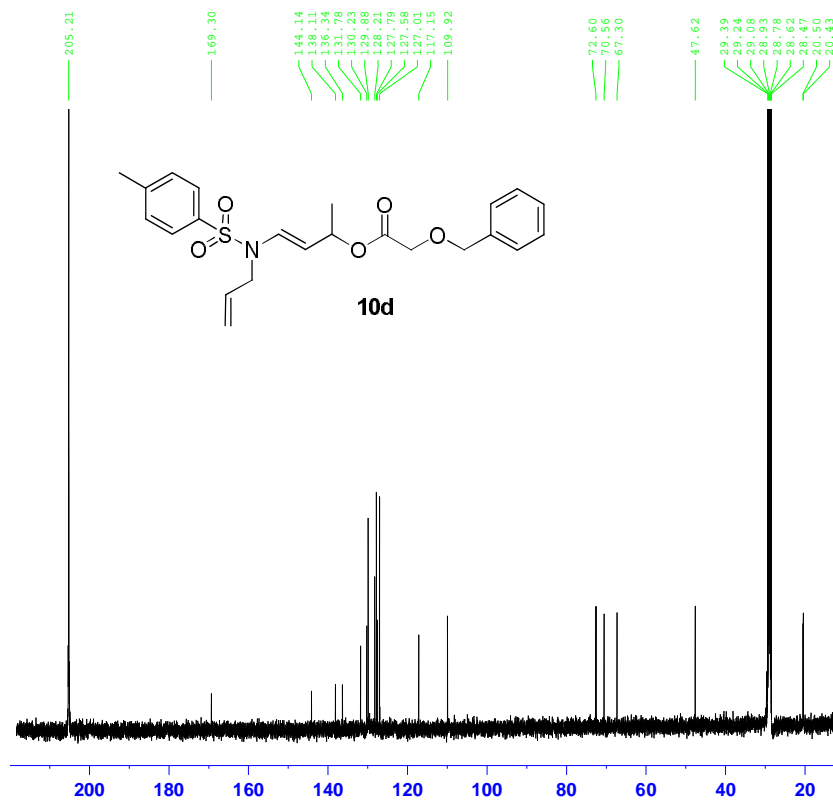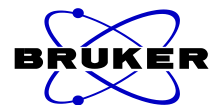

Current Data Parameters  
 NAME WH9-061-A1  
 EXPNO 2  
 PROCNO 1

F2 - Acquisition Parameters  
 Date\_ 20100826  
 Time 11.26  
 INSTRUM spect  
 PROBHD 5 mm PABBO BB/  
 PULPROG zgpg30  
 TD 65536  
 SOLVENT Acetone  
 NS 256  
 DS 4  
 SWH 29761.904 Hz  
 FIDRES 0.454131 Hz  
 AQ 1.1010548 sec  
 RG 362  
 DW 16.800 usec  
 DE 6.00 usec  
 TE 298.0 K  
 D1 2.0000000 sec  
 d11 0.0300000 sec  
 DELTA 1.89999998 sec  
 TD0 1

==== CHANNEL f1 =====  
 NUC1 13C  
 P1 7.50 usec  
 PL1 0.34 dB  
 SFO1 125.7703643 MHz

==== CHANNEL f2 =====  
 CPDPRG2 waltz16  
 NUC2 1H  
 FCPD2 80.00 usec  
 PL12 17.98 dB  
 PL13 20.00 dB  
 PL2 -1.00 dB  
 SFO2 500.1320005 MHz

F2 - Processing parameters  
 SI 32768  
 SF 125.7577890 MHz  
 WDW EM  
 SSB 0  
 LB 1.00 Hz  
 GB 0  
 PC 1.40

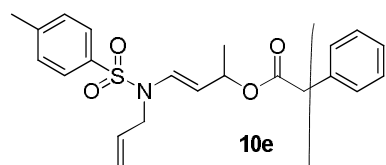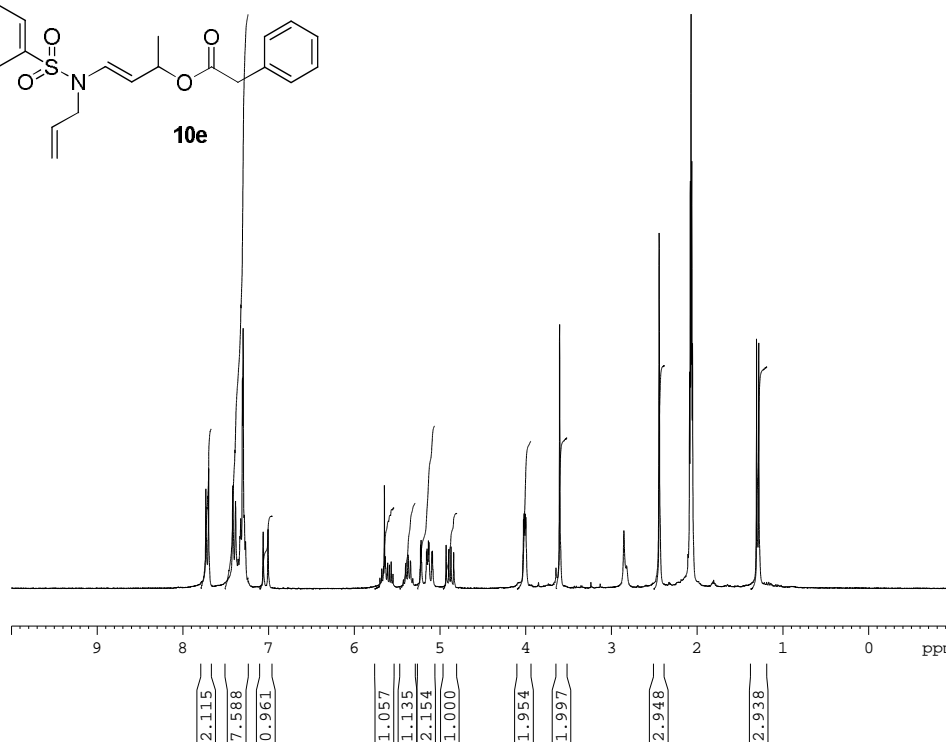

```

Current Data Parameters
NAME      Aug27-2010-bcc
EXPNO    1
PROCNO   1

F2 - Acquisition Parameters
Date_    20100827
Time     14.09
INSTRUM  spect
PROBHD   5 mm DUL 1H-13
PULPROG  zg30
TD        32768
SOLVENT  Acetone
NS        32
DS        2
SWH       5175.883 Hz
FIDRES    0.157958 Hz
AQ        3.1654389 sec
RG        327.5
DW        96.600 usec
DE        6.00 usec
TE        300.0 K
D1        1.00000000 sec
TD0       1

===== CHANNEL f1 =====
NUC1      1H
P1        11.00 usec
PL1       0.00 dB
SFO1      250.1315450 MHz

F2 - Processing parameters
SI        32768
SF        250.1300000 MHz
WDW       EM
SSB       0
LB        0.30 Hz
GB        0
PC        1.00
    
```

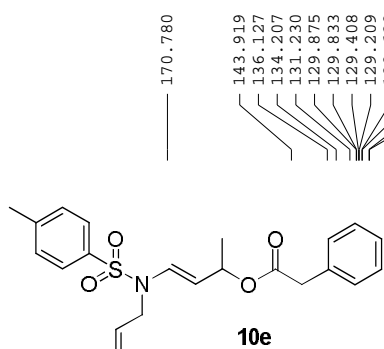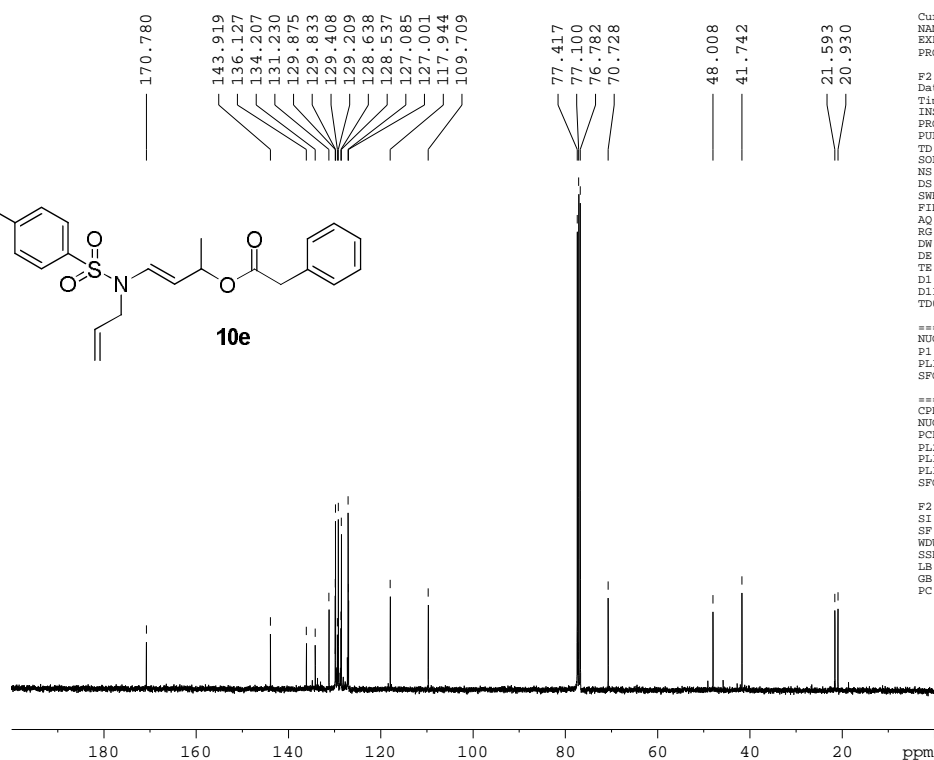

```

Current Data Parameters
NAME      WH7-093-A1
EXPNO    1
PROCNO   1

F2 - Acquisition Parameters
Date_    20100226
Time     11.48
INSTRUM  spect
PROBHD   5 mm PABBO BB-
PULPROG  zgpg30
TD        65536
SOLVENT  CDCl3
NS        350
DS        4
SWH       23980.814 Hz
FIDRES    0.365918 Hz
AQ        1.3664756 sec
RG        14596.5
DW        20.850 usec
DE        6.00 usec
TE        298.0 K
D1        2.00000000 sec
D11       0.03000000 sec
TD0       1

===== CHANNEL f1 =====
NUC1      13C
P1        7.30 usec
PL1       0.00 dB
SFO1      100.6228298 MHz

===== CHANNEL f2 =====
CPDPRG2  waltz16
NUC2      1H
PCPD2     80.00 usec
PL2       0.00 dB
PL12      17.23 dB
PL13      20.00 dB
SFO2      400.1316005 MHz

F2 - Processing parameters
SI        32768
SF        100.6127690 MHz
WDW       EM
SSB       0
LB        1.00 Hz
GB        0
PC        1.40
    
```

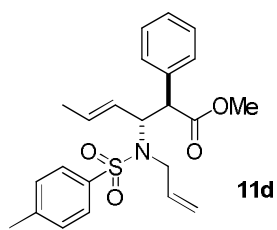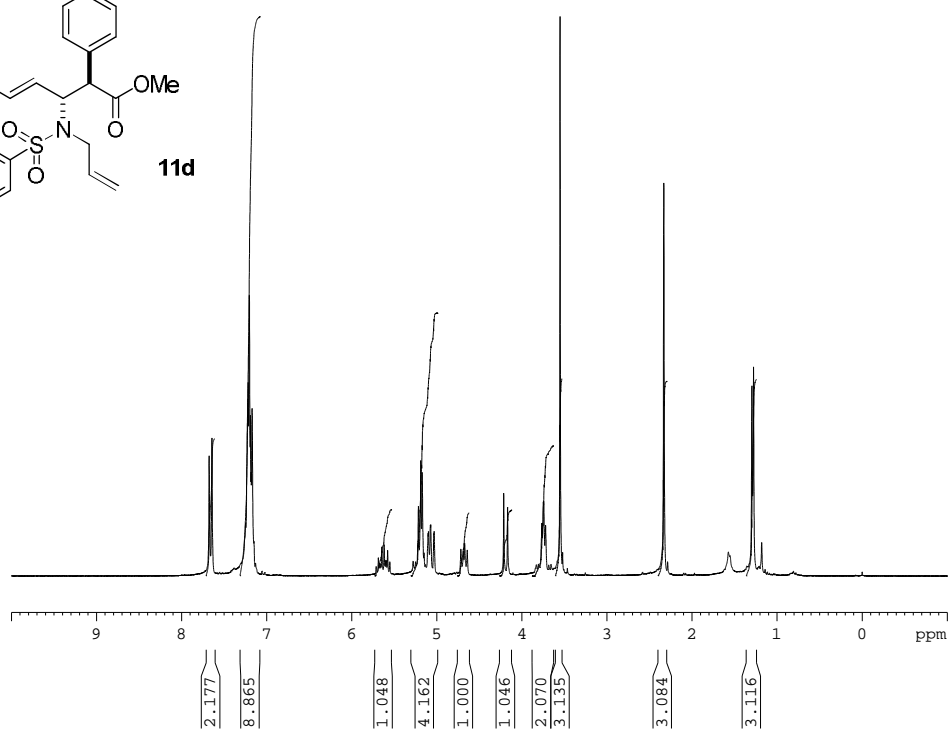

```

Current Data Parameters
NAME      Aug20-2010-drc
EXPNO    1
PROCNO   1

F2 - Acquisition Parameters
Date_    20100820
Time     18.06
INSTRUM  spect
PROBHD   5 mm DUL H-13
PULPROG  zgpg30
TD        32768
SOLVENT  CDCl3
NS        32
DS        2
SWH       5175.983 Hz
FIDRES    0.157958 Hz
AQ        3.185438 sec
RG        161.3
DW        86.600 usec
DE        6.00 usec
TE        300.0 K
SI        1.00000000 sec
TDO       1

===== CHANNEL f1 =====
NUC1      1H
P1        11.00 usec
PL1       0.00 dB
SFO1      250.131450 MHz

F2 - Processing parameters
SI        32768
SF        250.1300251 MHz
WDW       EM
SSB       0
LB        0.30 Hz
GB        0
PC        1.00
    
```

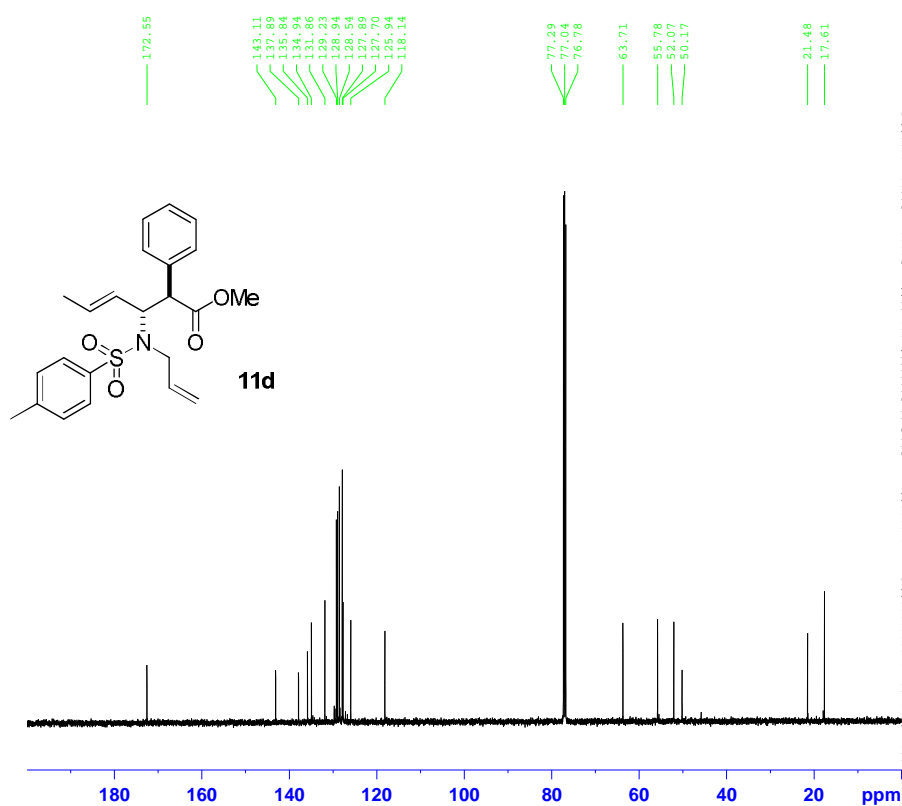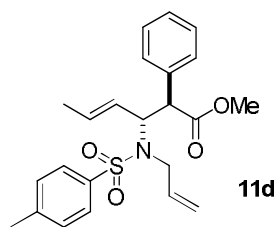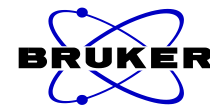

```

Current Data Parameters
NAME      WH8-009-B1
EXPNO    2
PROCNO   1

F2 - Acquisition Parameters
Date_    20100428
Time     12.17
INSTRUM  spect
PROBHD   5 mm PABBO BB/
PULPROG  zgpg30
TD        65536
SOLVENT  CDCl3
NS        178
DS        4
SWH       29761.904 Hz
FIDRES    0.454131 Hz
AQ        1.1010548 sec
RG        362
DW        16.800 usec
DE        6.00 usec
TE        298.0 K
D1        2.00000000 sec
d11       0.03000000 sec
DELTA    1.89999998 sec
TDO       1

===== CHANNEL f1 =====
NUC1      13C
P1        7.50 usec
PL1       0.34 dB
SFO1      125.7703643 MHz

===== CHANNEL f2 =====
CPDPRG2  waltz16
NUC2      1H
PCPD2    80.00 usec
PL12     17.98 dB
PL13     20.00 dB
PL2      -1.00 dB
SFO2     500.1320005 MHz

F2 - Processing parameters
SI        32768
SF        125.7577890 MHz
WDW       EM
SSB       0
LB        1.00 Hz
GB        0
PC        1.40
    
```

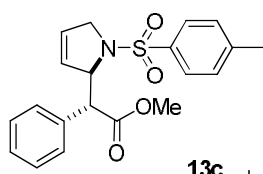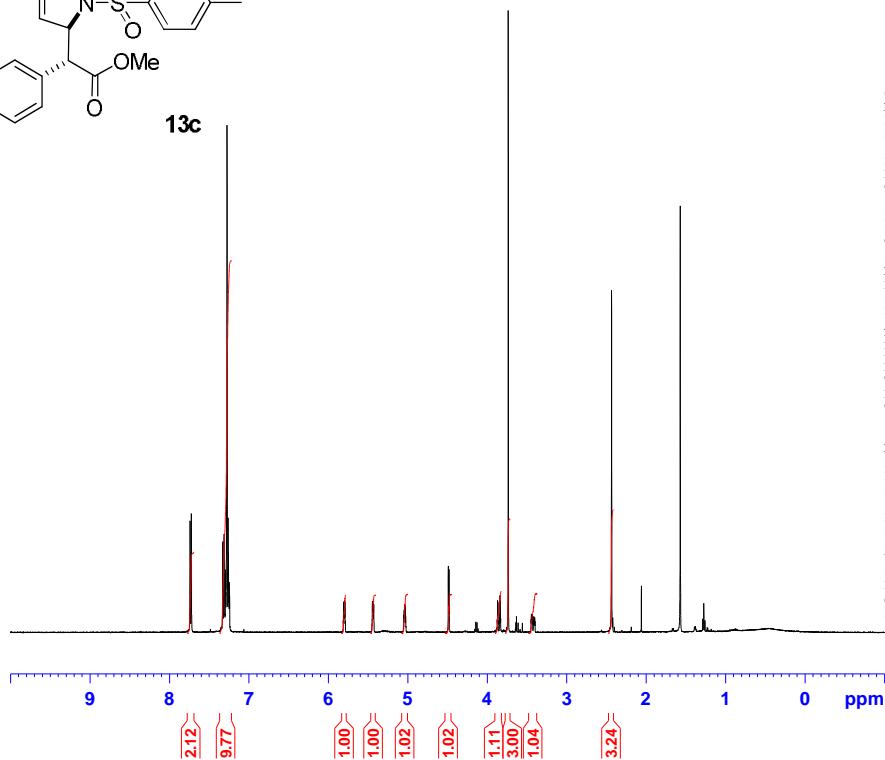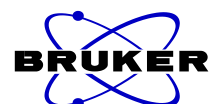

Current Data Parameters  
 NAME WH9-051-B2  
 EXPNO 1  
 PROCNO 1

F2 - Acquisition Parameters  
 Date\_ 20100826  
 Time 11.53  
 INSTRUM spect  
 PROBHD 5 mm PABBO BB/  
 PULPROG zg30  
 TD 65536  
 SOLVENT CDCl3  
 NS 8  
 DS 0  
 SWH 10330.578 Hz  
 FIDRES 0.157632 Hz  
 AQ 3.1719923 sec  
 RG 456  
 DW 48.400 usec  
 DE 6.00 usec  
 TE 298.0 K  
 D1 1.0000000 sec  
 TD0 1

===== CHANNEL f1 =====  
 NUC1 1H  
 P1 9.50 usec  
 PL1 -1.00 dB  
 SFO1 500.1330885 MHz

F2 - Processing parameters  
 SI 32768  
 SF 500.1300000 MHz  
 WDW hc  
 SSB 0  
 LB 0.00 Hz  
 GB 0  
 PC 1.00

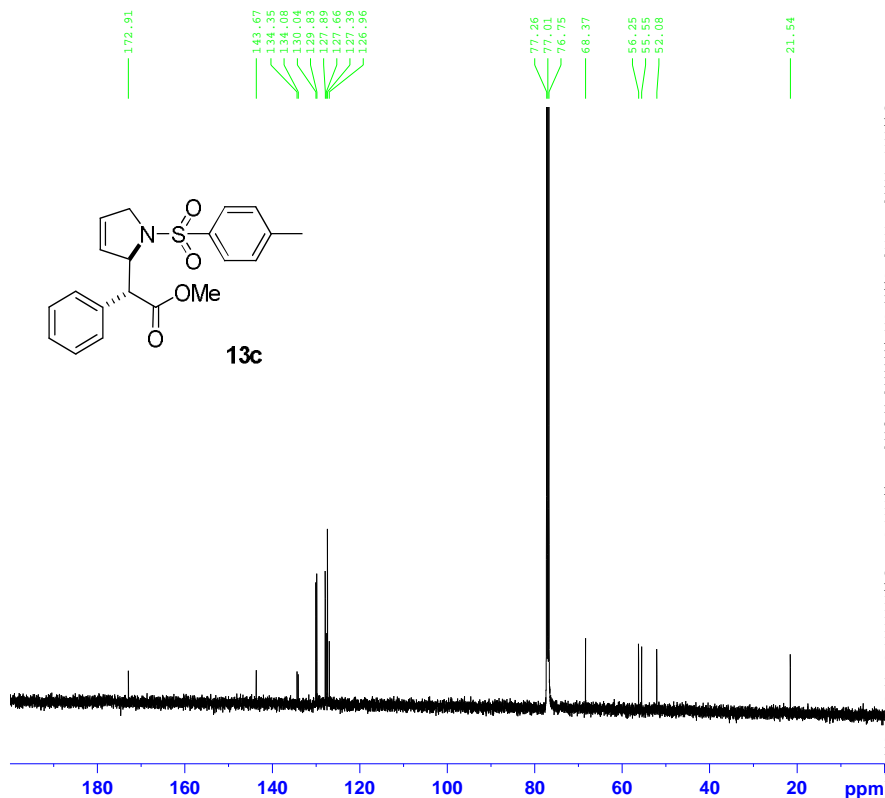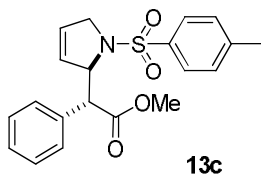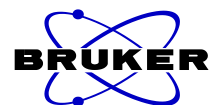

Current Data Parameters  
 NAME WH9-051-B2  
 EXPNO 3  
 PROCNO 1

F2 - Acquisition Parameters  
 Date\_ 20100828  
 Time 9.26  
 INSTRUM spect  
 PROBHD 5 mm PABBO BB/  
 PULPROG zg30  
 TD 65536  
 SOLVENT CDCl3  
 NS 1509  
 DS 4  
 SWH 29761.904 Hz  
 FIDRES 0.454131 Hz  
 AQ 1.1010548 sec  
 RG 362  
 DW 16.800 usec  
 DE 6.00 usec  
 TE 298.0 K  
 D1 2.0000000 sec  
 d11 0.0300000 sec  
 DELTA 1.8999999 sec  
 TD0 1

===== CHANNEL f1 =====  
 NUC1 13C  
 P1 7.50 usec  
 PL1 0.34 dB  
 SFO1 125.7703643 MHz

===== CHANNEL f2 =====  
 CPDPRG2 waltz16  
 NUC2 1H  
 PCPD2 80.00 usec  
 PL12 17.98 dB  
 PL13 20.00 dB  
 PL2 -1.00 dB  
 SFO2 500.1320005 MHz

F2 - Processing parameters  
 SI 32768  
 SF 125.7577890 MHz  
 WDW EM  
 SSB 0  
 LB 1.00 Hz  
 GB 0  
 PC 1.40



WH9-059-A1

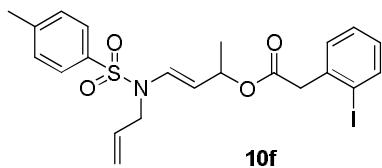

Current Data Parameters  
 NAME WH9-059-A1  
 EXPNO 1  
 PROCNO 1

F2 - Acquisition Parameters  
 Date\_ 20100826  
 Time\_ 11.07  
 INSTRUM spect  
 PROBHD 5 mm PABBO BB/  
 PULPROG zg30  
 TD 65536  
 SOLVENT Acetone  
 NS 8  
 DS 0  
 SWH 10330.578 Hz  
 FIDRES 0.157632 Hz  
 AQ 3.1719923 sec  
 RG 406  
 DW 48.400 usec  
 DE 6.00 usec  
 TE 298.0 K  
 D1 1.0000000 sec  
 TDO 1

===== CHANNEL f1 =====  
 NUC1 1H  
 P1 9.50 usec  
 PL1 -1.00 dB  
 SFO1 500.1330885 MHz

F2 - Processing parameters  
 SI 32768  
 SF 500.1300000 MHz  
 WDW no  
 SSB 0  
 LB 0.00 Hz  
 GB 0  
 PC 1.00

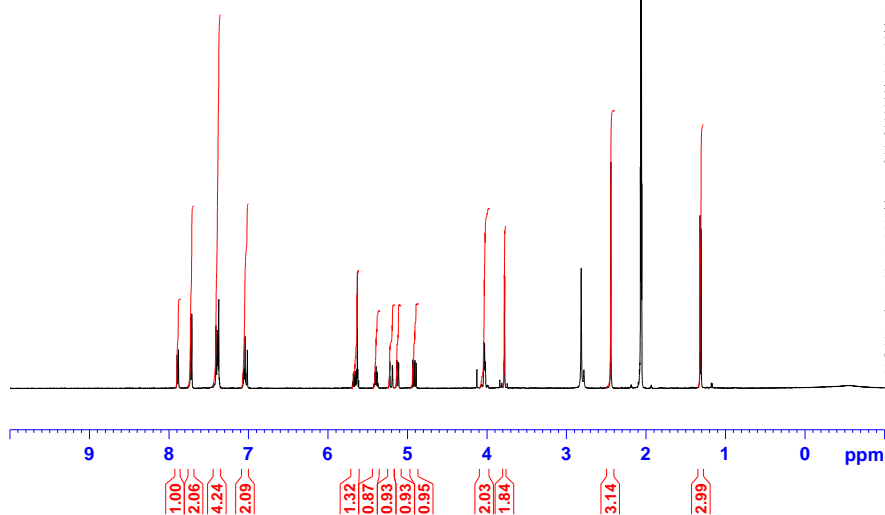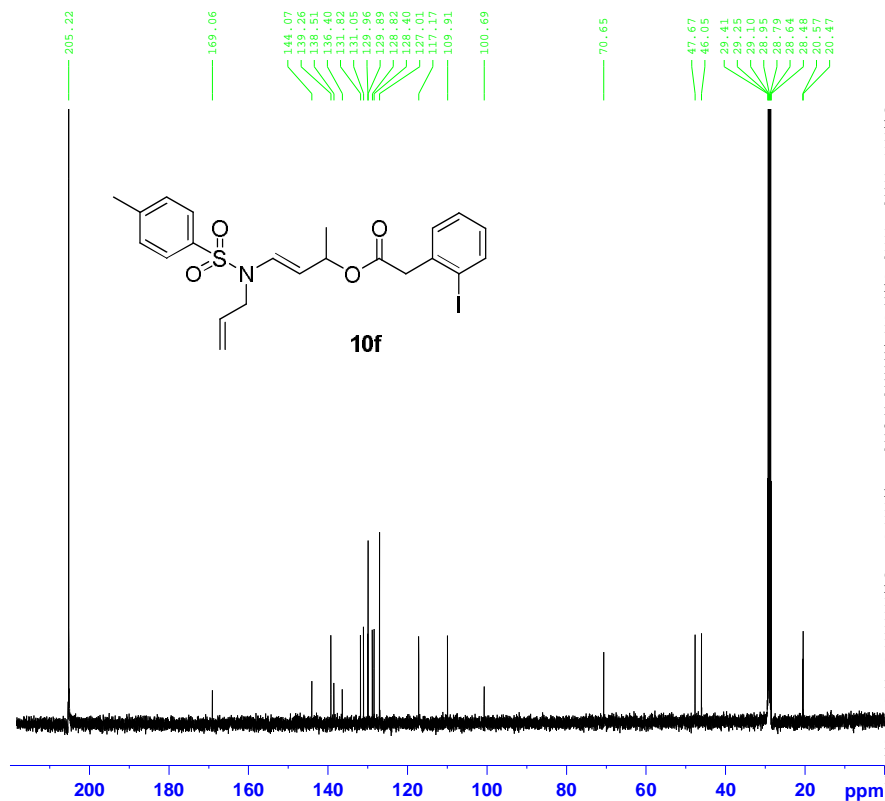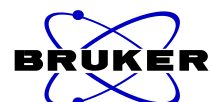

Current Data Parameters  
 NAME WH9-059-A1  
 EXPNO 2  
 PROCNO 1

F2 - Acquisition Parameters  
 Date\_ 20100826  
 Time\_ 11.43  
 INSTRUM spect  
 PROBHD 5 mm PABBO BB/  
 PULPROG zgpg30  
 TD 65536  
 SOLVENT Acetone  
 NS 83  
 DS 4  
 SWH 29761.904 Hz  
 FIDRES 0.454131 Hz  
 AQ 1.1010548 sec  
 RG 362  
 DW 16.800 usec  
 DE 6.00 usec  
 TE 298.0 K  
 D1 2.0000000 sec  
 d11 0.0300000 sec  
 DELTA 1.8999998 sec  
 TDO 1

===== CHANNEL f1 =====  
 NUC1 13C  
 P1 7.50 usec  
 PL1 0.34 dB  
 SFO1 125.7703643 MHz

===== CHANNEL f2 =====  
 CPDPRG2 waltz16  
 NUC2 1H  
 PCPD2 80.00 usec  
 PL12 17.98 dB  
 PL13 20.00 dB  
 PL2 -1.00 dB  
 SFO2 500.1320005 MHz

F2 - Processing parameters  
 SI 32768  
 SF 125.7577890 MHz  
 WDW EM  
 SSB 0  
 LB 1.00 Hz  
 GB 0  
 PC 1.40

WH9-099-B1

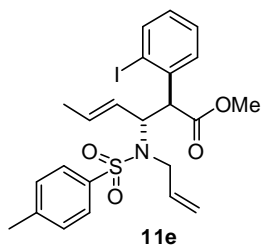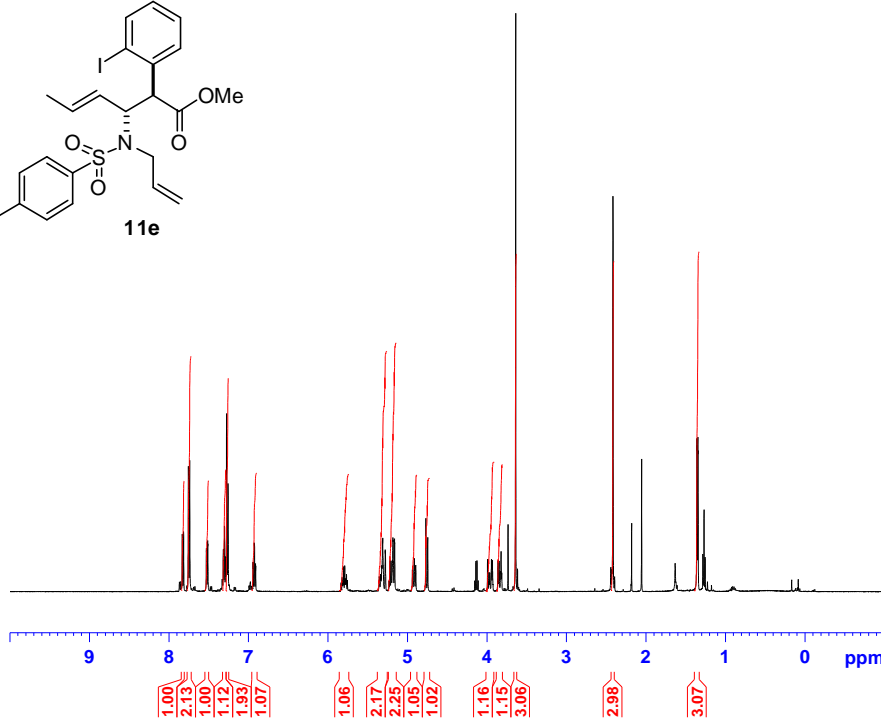

Current Data Parameters  
 NAME WH9-099-B1  
 EXPNO 1  
 PROCNO 1

F2 - Acquisition Parameters  
 Date\_ 20100906  
 Time 11.22  
 INSTRUM spect  
 PROBHD 5 mm PABBO BB/  
 PULPROG zg30  
 TD 65536  
 SOLVENT CDCl3  
 NS 8  
 DS 0  
 SWH 10330.578 Hz  
 FIDRES 0.157632 Hz  
 AQ 3.1719923 sec  
 RG 181  
 DW 48.400 usec  
 DE 6.00 usec  
 TE 298.0 K  
 D1 1.0000000 sec  
 TDO 1

===== CHANNEL f1 =====  
 NUC1 1H  
 P1 9.50 usec  
 PL1 -1.00 dB  
 SFO1 500.1330885 MHz

F2 - Processing parameters  
 SI 32768  
 SF 500.1300000 MHz  
 WDW no  
 SSB 0  
 LB 0.00 Hz  
 GB 0  
 PC 1.00

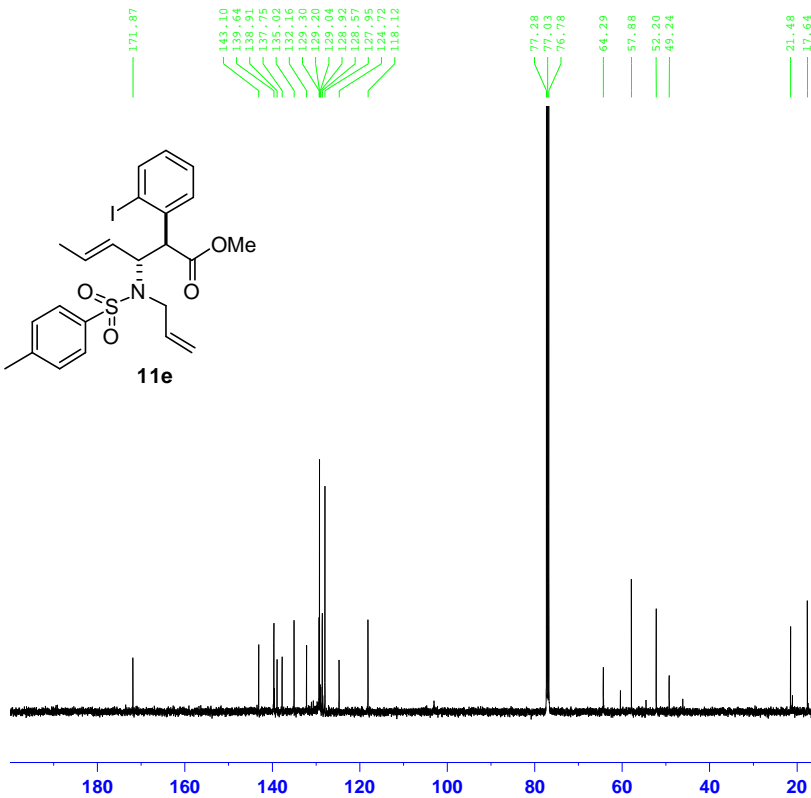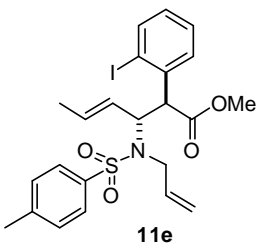

Current Data Parameters  
 NAME WH9-099-B1  
 EXPNO 2  
 PROCNO 1

F2 - Acquisition Parameters  
 Date\_ 20100906  
 Time 11.31  
 INSTRUM spect  
 PROBHD 5 mm PABBO BB/  
 PULPROG zgpg30  
 TD 65536  
 SOLVENT CDCl3  
 NS 256  
 DS 4  
 SWH 29761.904 Hz  
 FIDRES 0.454131 Hz  
 AQ 1.1010548 sec  
 RG 362  
 DW 16.800 usec  
 DE 6.00 usec  
 TE 298.0 K  
 D1 2.0000000 sec  
 d11 0.0300000 sec  
 DELTA 1.89999998 sec  
 TDO 1

===== CHANNEL f1 =====  
 NUC1 13C  
 P1 7.50 usec  
 PL1 0.34 dB  
 SFO1 125.7703643 MHz

===== CHANNEL f2 =====  
 CPDPRG2 waltz16  
 NUC2 1H  
 PCPD2 80.00 usec  
 PL12 17.98 dB  
 PL13 20.00 dB  
 PL2 -1.00 dB  
 SFO2 500.1320005 MHz

F2 - Processing parameters  
 SI 32768  
 SF 125.7577890 MHz  
 WDW EM  
 SSB 0  
 LB 1.00 Hz  
 GB 0  
 PC 1.40

WH9-145-2-C1

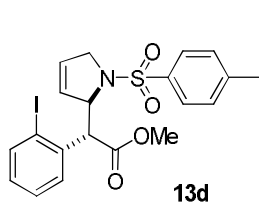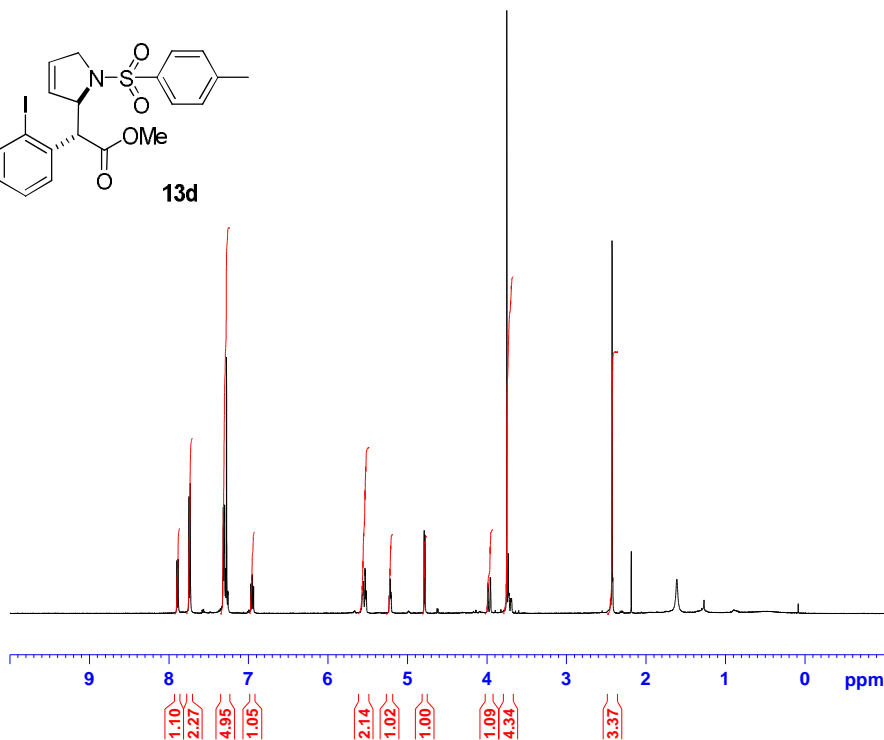

Current Data Parameters  
 NAME WH9-145-2-C1  
 EXPNO 1  
 PROCNO 1

F2 - Acquisition Parameters  
 Date\_ 20100916  
 Time 11.21  
 INSTRUM spect  
 PROBHD 5 mm PABBO BB/  
 PULPROG zg30  
 TD 65536  
 SOLVENT CDCl3  
 NS 8  
 DS 0  
 SWH 10330.578 Hz  
 FIDRES 0.157632 Hz  
 AQ 3.1719923 sec  
 RG 362  
 DW 48.400 usec  
 DE 6.00 usec  
 TE 298.0 K  
 D1 1.0000000 sec  
 TD0 1

===== CHANNEL f1 =====  
 NUC1 1H  
 P1 9.50 usec  
 PL1 -1.00 dB  
 SFO1 500.1330885 MHz

F2 - Processing parameters  
 SI 32768  
 SF 500.1300000 MHz  
 WDW no  
 SSB 0  
 LB 0.00 Hz  
 GB 0  
 PC 1.00

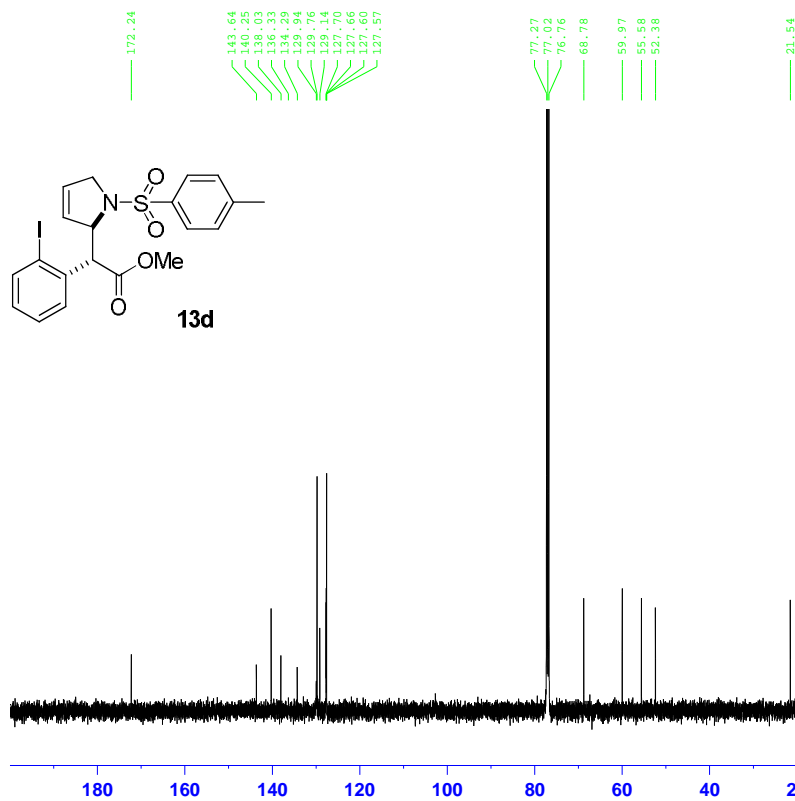

Current Data Parameters  
 NAME WH9-145-2-C1  
 EXPNO 2  
 PROCNO 1

F2 - Acquisition Parameters  
 Date\_ 20100916  
 Time 11.25  
 INSTRUM spect  
 PROBHD 5 mm PABBO BB/  
 PULPROG zgpg30  
 TD 65536  
 SOLVENT CDCl3  
 NS 256  
 DS 4  
 SWH 29761.904 Hz  
 FIDRES 0.454131 Hz  
 AQ 1.1010548 sec  
 RG 575  
 DW 16.800 usec  
 DE 6.00 usec  
 TE 298.0 K  
 D1 2.0000000 sec  
 d11 0.0300000 sec  
 DELTA 1.8999998 sec  
 TD0 1

===== CHANNEL f1 =====  
 NUC1 13C  
 P1 7.50 usec  
 PL1 0.34 dB  
 SFO1 125.7703643 MHz

===== CHANNEL f2 =====  
 CPDPRG2 waltz16  
 NUC2 1H  
 PCPD2 80.00 usec  
 PL12 17.98 dB  
 PL13 20.00 dB  
 PL2 -1.00 dB  
 SFO2 500.1320005 MHz

F2 - Processing parameters  
 SI 32768  
 SF 125.7577890 MHz  
 WDW EM  
 SSB 0  
 LB 1.00 Hz  
 GB 0  
 PC 1.40

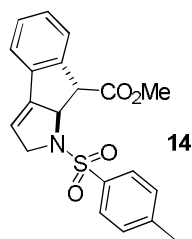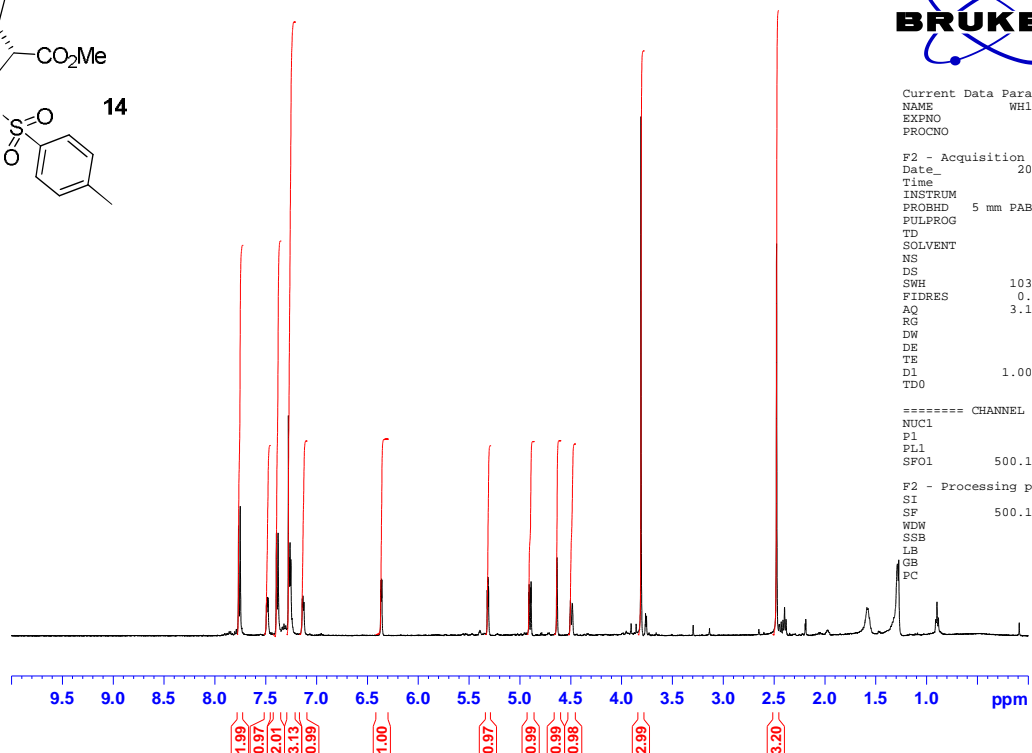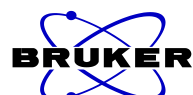

Current Data Parameters  
 NAME WH10-HECK  
 EXPNO 1  
 PROCNO 1

F2 - Acquisition Parameters  
 Date\_ 20101014  
 Time 15.25  
 INSTRUM spect  
 PROBHD 5 mm PABBO BB/  
 PULPROG zg30  
 TD 65536  
 SOLVENT CDCl3  
 NS 8  
 DS 0  
 SWH 10330.578 Hz  
 FIDRES 0.157632 Hz  
 AQ 3.1719923 sec  
 RG 362  
 DW 48.400 usec  
 DE 6.00 usec  
 TE 298.0 K  
 D1 1.0000000 sec  
 TDO 1

===== CHANNEL f1 =====  
 NUC1 1H  
 P1 9.50 usec  
 PL1 -1.00 dB  
 SFO1 500.1330885 MHz

F2 - Processing parameters  
 SI 32768  
 SF 500.1300000 MHz  
 WDM no  
 SSB 0  
 LB 0.00 Hz  
 GB 0  
 PC 1.00

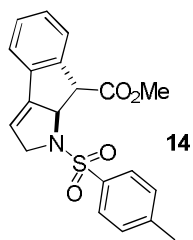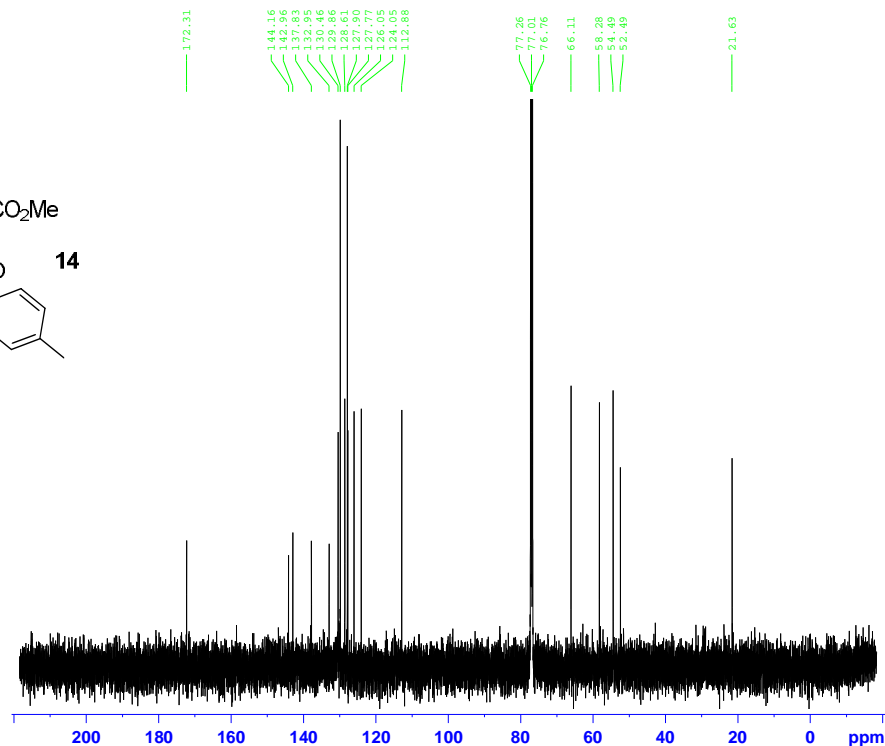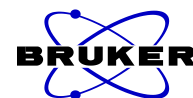

Current Data Parameters  
 NAME WH10-HECK  
 EXPNO 2  
 PROCNO 1

F2 - Acquisition Parameters  
 Date\_ 20101014  
 Time 15.34  
 INSTRUM spect  
 PROBHD 5 mm PABBO BB/  
 PULPROG zgpg30  
 TD 65536  
 SOLVENT CDCl3  
 NS 267  
 DS 4  
 SWH 29761.904 Hz  
 FIDRES 0.454131 Hz  
 AQ 1.1010548 sec  
 RG 362  
 DW 16.800 usec  
 DE 6.00 usec  
 TE 298.0 K  
 D1 2.0000000 sec  
 d11 0.0300000 sec  
 DELTA 1.89999998 sec  
 TDO 1

===== CHANNEL f1 =====  
 NUC1 13C  
 P1 7.50 usec  
 PL1 0.34 dB  
 SFO1 125.7703643 MHz

===== CHANNEL f2 =====  
 CPDPRG2 waltz16  
 NUC2 1H  
 FPCP2 80.00 usec  
 PL12 17.98 dB  
 PL13 20.00 dB  
 PL2 -1.00 dB  
 SFO2 500.1320005 MHz

F2 - Processing parameters  
 SI 32768  
 SF 125.7577890 MHz  
 WDM BW  
 SSB 0  
 LB 1.00 Hz  
 GB 0  
 PC 1.40

WH9-123-A1

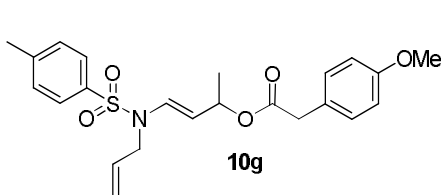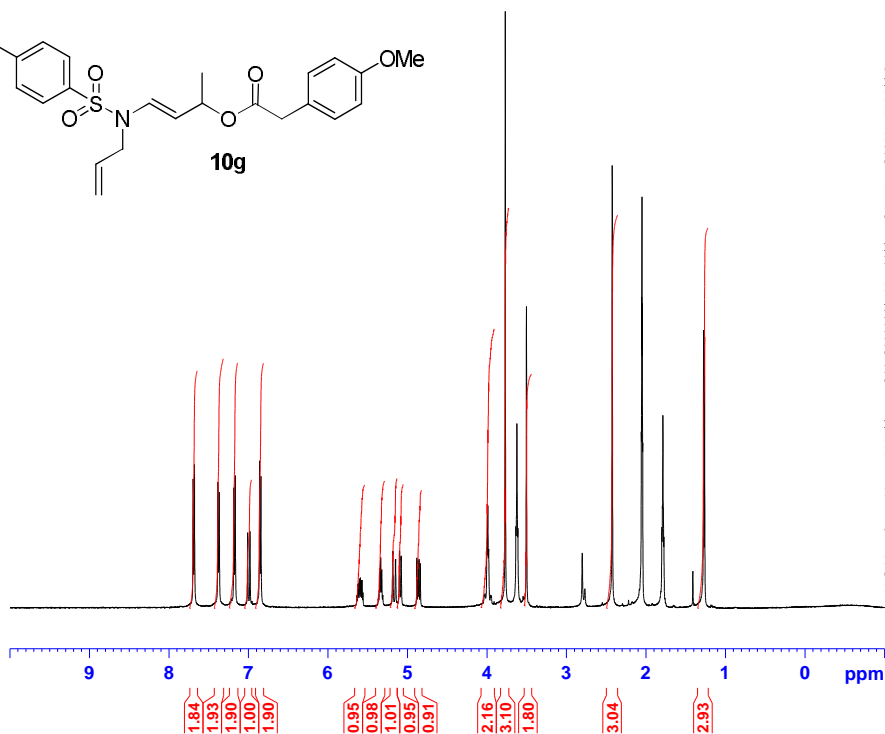

Current Data Parameters  
 NAME WH9-123-A1  
 EXPNO 2  
 PROCNO 1

F2 - Acquisition Parameters  
 Date\_ 20100909  
 Time 13.02  
 INSTRUM spect  
 PROBHD 5 mm PABBO BB/  
 PULPROG zg30  
 TD 65536  
 SOLVENT CDCl3  
 NS 8  
 DS 0  
 SWH 10330.578 Hz  
 FIDRES 0.157632 Hz  
 AQ 3.1719923 sec  
 RG 256  
 DW 48.400 usec  
 DE 6.00 usec  
 TE 298.0 K  
 D1 1.0000000 sec  
 TD0 1

===== CHANNEL f1 =====  
 NUC1 1H  
 P1 9.50 usec  
 PL1 -1.00 dB  
 SFO1 500.1330885 MHz

F2 - Processing parameters  
 SI 32768  
 SF 500.1326050 MHz  
 WDW no  
 SSB 0  
 LB 0.00 Hz  
 GB 0  
 PC 1.00

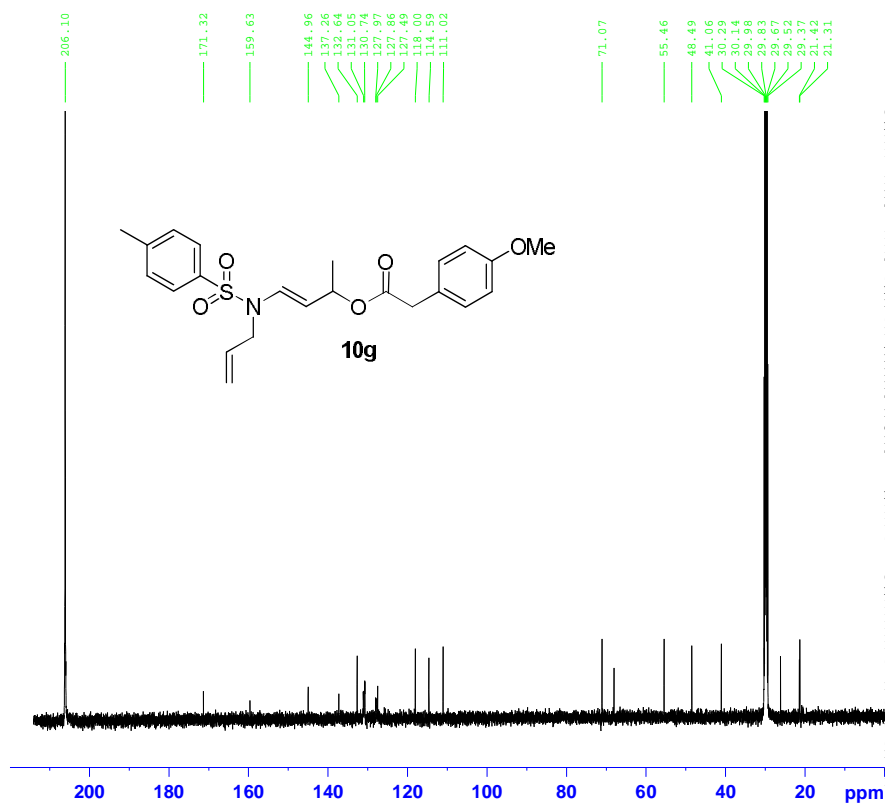

Current Data Parameters  
 NAME WH9-123-A1  
 EXPNO 3  
 PROCNO 1

F2 - Acquisition Parameters  
 Date\_ 20100909  
 Time 13.09  
 INSTRUM spect  
 PROBHD 5 mm PABBO BB/  
 PULPROG zgpg30  
 TD 65536  
 SOLVENT CDCl3  
 NS 240  
 DS 4  
 SWH 29761.904 Hz  
 FIDRES 0.454131 Hz  
 AQ 1.1010548 sec  
 RG 362  
 DW 16.800 usec  
 DE 6.00 usec  
 TE 298.0 K  
 D1 2.0000000 sec  
 d11 0.0300000 sec  
 DELTA 1.8999998 sec  
 TD0 1

===== CHANNEL f1 =====  
 NUC1 13C  
 P1 7.50 usec  
 PL1 0.34 dB  
 SFO1 125.7703643 MHz

===== CHANNEL f2 =====  
 CPDPRG2 waltz16  
 NUC2 1H  
 PCPD2 80.00 usec  
 PL12 17.98 dB  
 PL13 20.00 dB  
 PL2 -1.00 dB  
 SFO2 500.1320005 MHz

F2 - Processing parameters  
 SI 32768  
 SF 125.7583299 MHz  
 WDW EM  
 SSB 0  
 LB 1.00 Hz  
 GB 0  
 PC 1.40

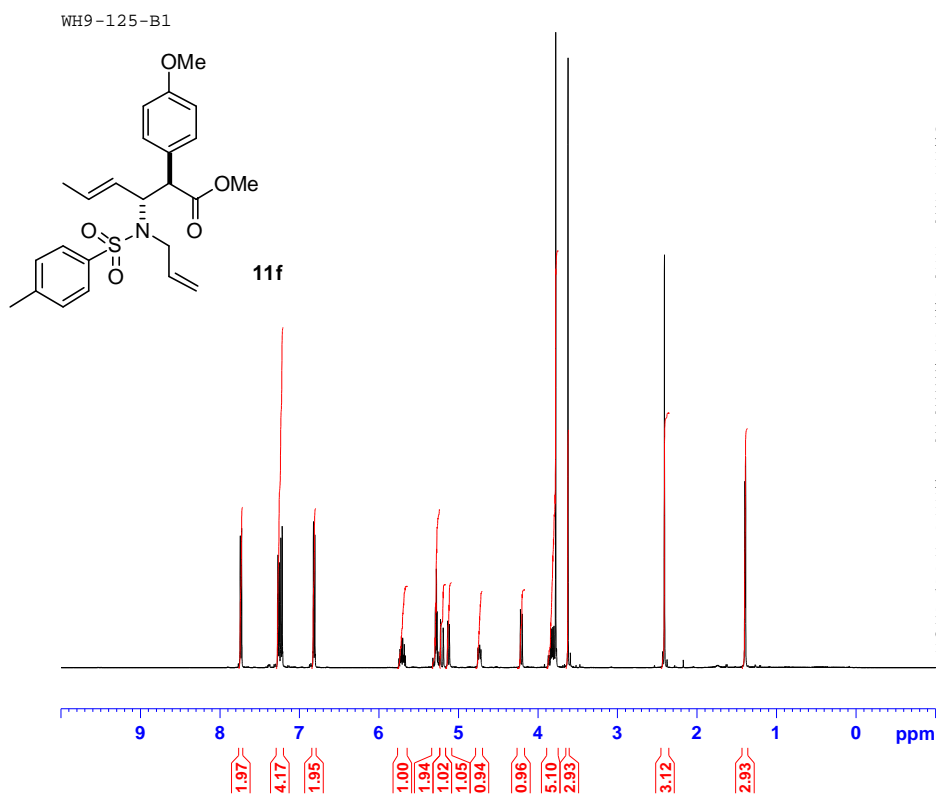

Current Data Parameters  
 NAME WH9-125-B1  
 EXPNO 1  
 PROCNO 1

F2 - Acquisition Parameters  
 Date\_ 20100913  
 Time 13.12  
 INSTRUM spect  
 PROBHD 5 mm PABBO BB/  
 PULPROG zg30  
 TD 65536  
 SOLVENT CDCl3  
 NS 8  
 DS 0  
 SWH 10330.578 Hz  
 FIDRES 0.157632 Hz  
 AQ 3.1719923 sec  
 RG 64  
 DW 48.400 usec  
 DE 6.00 usec  
 TE 298.0 K  
 D1 1.0000000 sec  
 TD0 1

===== CHANNEL f1 =====  
 NUC1 1H  
 P1 9.50 usec  
 PL1 -1.00 dB  
 SFO1 500.1330885 MHz

F2 - Processing parameters  
 SI 32768  
 SF 500.1300000 MHz  
 WDW no  
 SSB 0  
 LB 0.00 Hz  
 GB 0  
 PC 1.00

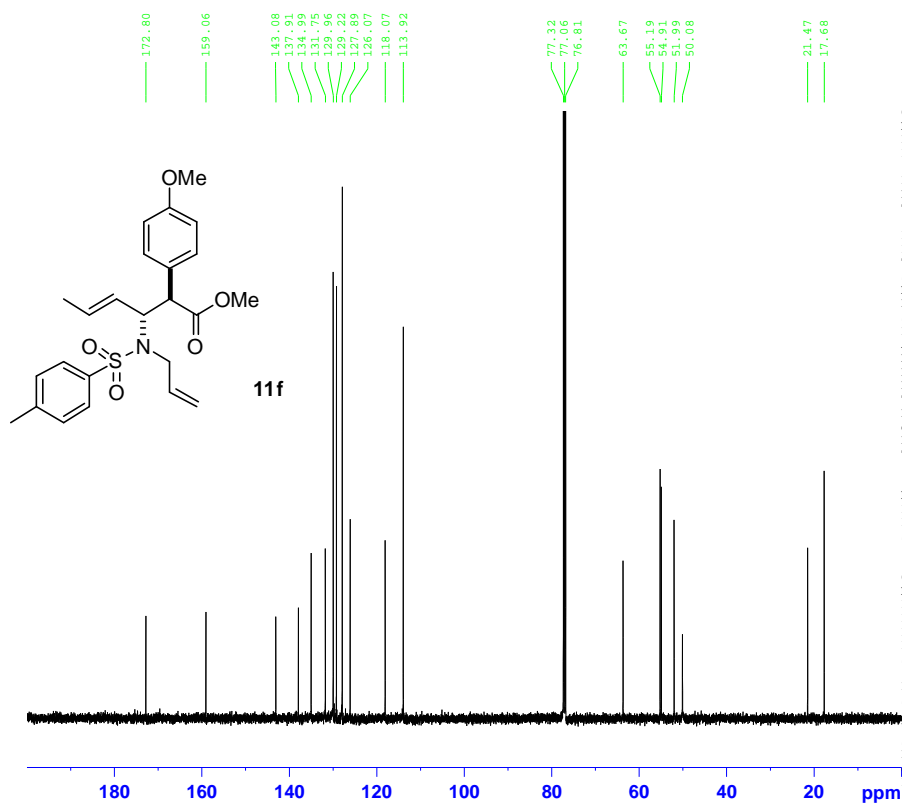

Current Data Parameters  
 NAME WH9-125-B1  
 EXPNO 2  
 PROCNO 1

F2 - Acquisition Parameters  
 Date\_ 20100913  
 Time 13.16  
 INSTRUM spect  
 PROBHD 5 mm PABBO BB/  
 PULPROG zgpg30  
 TD 65536  
 SOLVENT CDCl3  
 NS 84  
 DS 4  
 SWH 29761.904 Hz  
 FIDRES 0.454131 Hz  
 AQ 1.1010548 sec  
 RG 645  
 DW 16.800 usec  
 DE 6.00 usec  
 TE 298.0 K  
 D1 2.0000000 sec  
 d11 0.0300000 sec  
 DELTA 1.8999998 sec  
 TD0 1

===== CHANNEL f1 =====  
 NUC1 13C  
 P1 7.50 usec  
 PL1 0.34 dB  
 SFO1 125.7703643 MHz

===== CHANNEL f2 =====  
 CPDPRG2 waltz16  
 NUC2 1H  
 PCPD2 80.00 usec  
 PL12 17.98 dB  
 PL13 20.00 dB  
 PL2 -1.00 dB  
 SFO2 500.1320005 MHz

F2 - Processing parameters  
 SI 32768  
 SF 125.7577890 MHz  
 WDW EM  
 SSB 0  
 LB 1.00 Hz  
 GB 0  
 PC 1.40

WH9-155-3-B1

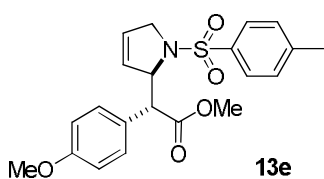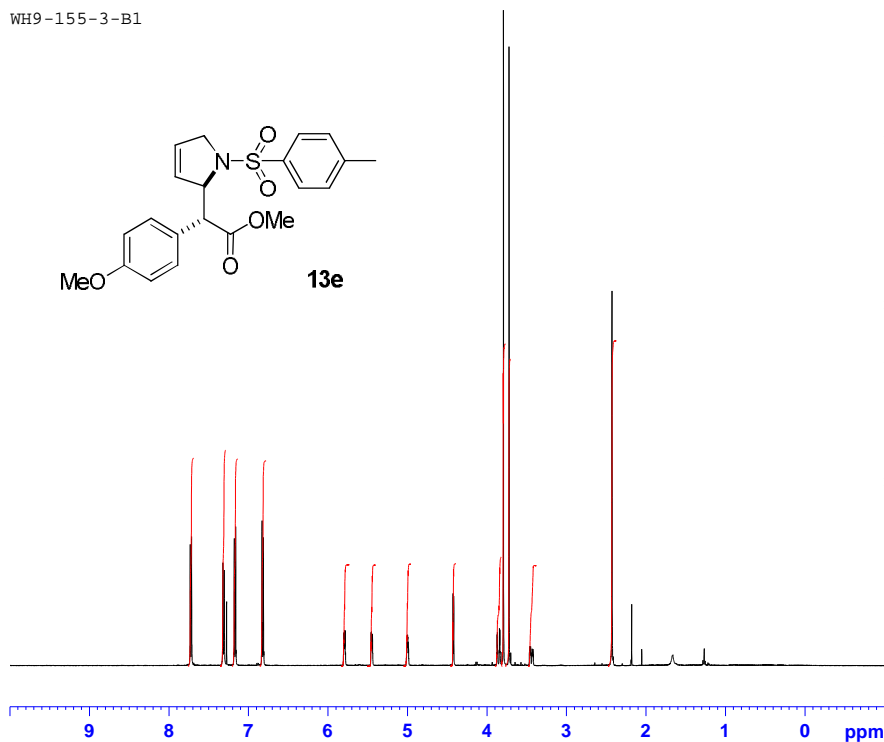

Current Data Parameters  
 NAME WH9-155-3-B1  
 EXPNO 1  
 PROCNO 1

F2 - Acquisition Parameters  
 Date\_ 20100916  
 Time\_ 11.05  
 INSTRUM spect  
 PROBHD 5 mm PABBO BB/  
 PULPROG zg30  
 TD 65536  
 SOLVENT CDCl3  
 NS 8  
 DS 0  
 SWH 10330.578 Hz  
 FIDRES 0.157632 Hz  
 AQ 3.1719923 sec  
 RG 161  
 DW 48.400 usec  
 DE 6.00 usec  
 TE 298.0 K  
 D1 1.0000000 sec  
 TD0 1

===== CHANNEL f1 =====  
 NUC1 1H  
 P1 9.50 usec  
 PL1 -1.00 dB  
 SFO1 500.1330885 MHz

F2 - Processing parameters  
 SI 32768  
 SF 500.1300000 MHz  
 WDW no  
 SSB 0  
 LB 0.00 Hz  
 GB 0  
 PC 1.00

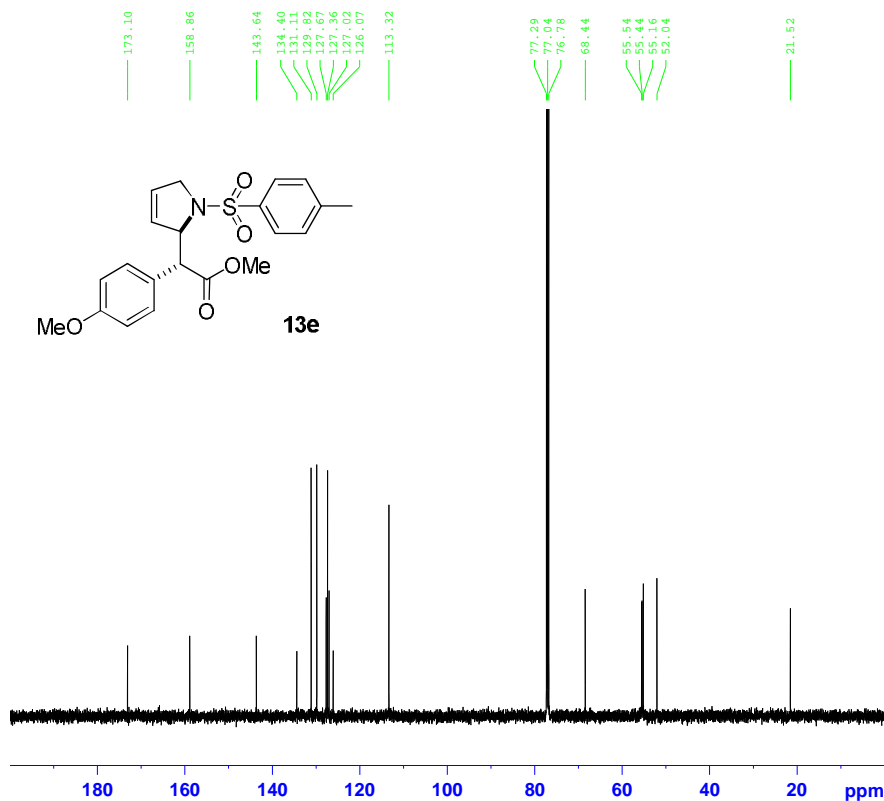

Current Data Parameters  
 NAME WH9-155-3-B1  
 EXPNO 2  
 PROCNO 1

F2 - Acquisition Parameters  
 Date\_ 20100916  
 Time\_ 11.09  
 INSTRUM spect  
 PROBHD 5 mm PABBO BB/  
 PULPROG zgpg30  
 TD 65536  
 SOLVENT CDCl3  
 NS 58  
 DS 4  
 SWH 29761.904 Hz  
 FIDRES 0.454131 Hz  
 AQ 1.1010548 sec  
 RG 575  
 DW 16.800 usec  
 DE 6.00 usec  
 TE 298.1 K  
 D1 2.0000000 sec  
 d11 0.0300000 sec  
 DELTA 1.89999998 sec  
 TD0 1

===== CHANNEL f1 =====  
 NUC1 13C  
 P1 7.50 usec  
 PL1 0.34 dB  
 SFO1 125.7703643 MHz

===== CHANNEL f2 =====  
 CPDPRG2 waltz16  
 NUC2 1H  
 PCPD2 80.00 usec  
 PL12 17.98 dB  
 PL13 20.00 dB  
 PL2 -1.00 dB  
 SFO2 500.1320005 MHz

F2 - Processing parameters  
 SI 32768  
 SF 125.7577890 MHz  
 WDW EM  
 SSB 0  
 LB 1.00 Hz  
 GB 0  
 PC 1.40

WH9-129-A1

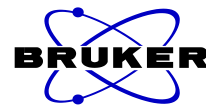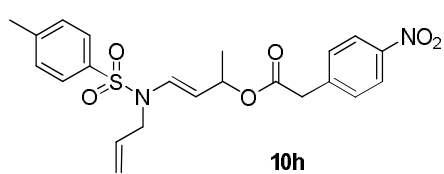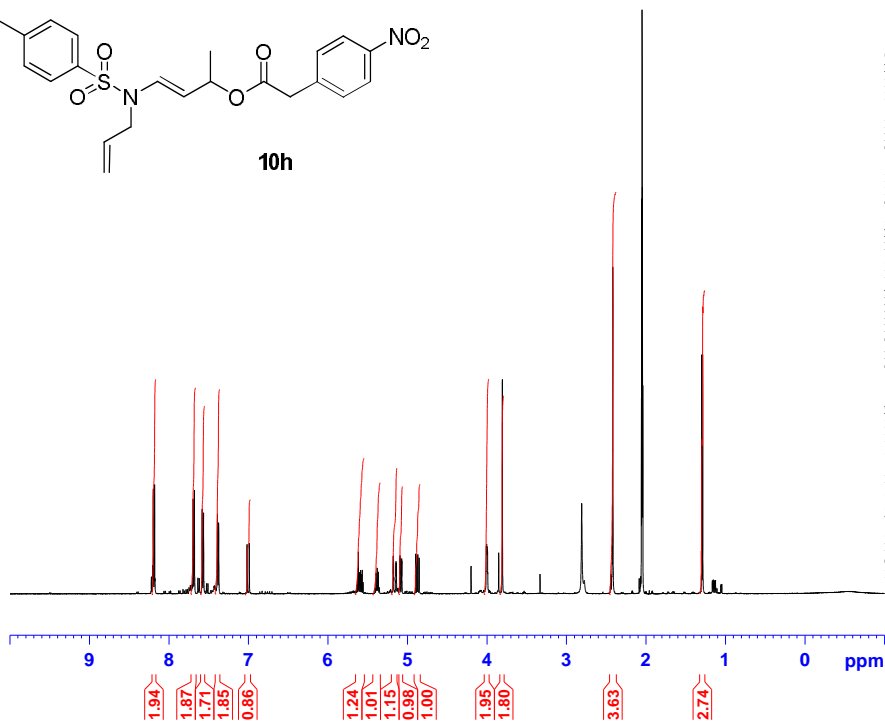

```

Current Data Parameters
NAME      WH9-129-A1
EXPNO    1
PROCNO   1

F2 - Acquisition Parameters
Date_    20100910
Time     11.21
INSTRUM spect
PROBHD   5 mm PABBO BB/
PULPROG zg30
TD        65536
SOLVENT  CDCl3
NS        8
DS        0
SWH       10330.578 Hz
FIDRES    0.157632 Hz
AQ        3.1719923 sec
RG        362
DW        48.400 usec
DE        6.00 usec
TE        298.0 K
D1        1.0000000 sec
TD0       1

===== CHANNEL f1 =====
NUC1      1H
P1        9.50 usec
PL1       -1.00 dB
SFO1     500.1330885 MHz

F2 - Processing parameters
SI        32768
SF        500.1326056 MHz
WDW       no
SSB       0
LB        0.00 Hz
GB        0
PC        1.00
    
```

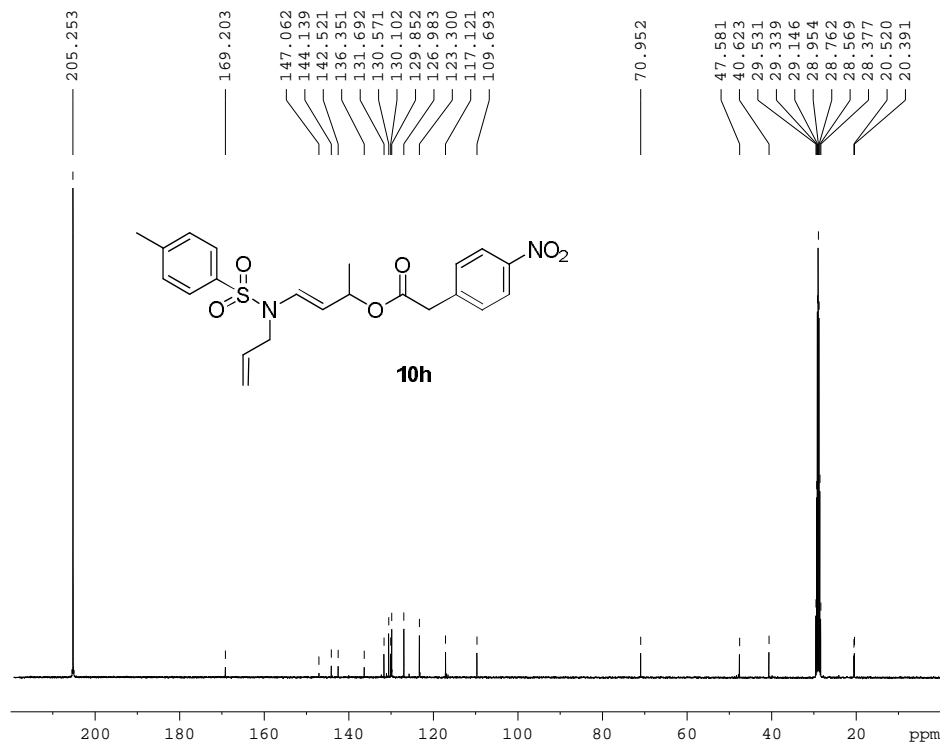

```

Current Data Parameters
NAME      WH9-129-A1
EXPNO    1
PROCNO   1

F2 - Acquisition Parameters
Date_    20100911
Time     10.13
INSTRUM spect
PROBHD   5 mm PABBO BB-
PULPROG zgpg30
TD        65536
SOLVENT  Acetone
NS        812
DS        4
SWH       23980.814 Hz
FIDRES    0.365918 Hz
AQ        1.3664756 sec
RG        14596.5
DW        20.850 usec
DE        6.00 usec
TE        298.0 K
D1        2.0000000 sec
D11       0.0300000 sec
TD0       1

===== CHANNEL f1 =====
NUC1      13C
P1        7.30 usec
PL1       0.00 dB
SFO1     100.6228298 MHz

===== CHANNEL f2 =====
CPDPRG2  waltz16
NUC2      1H
PCPD2    80.00 usec
PL2      0.00 dB
PL12     17.23 dB
PL13     20.00 dB
SFO2     400.1316005 MHz

F2 - Processing parameters
SI        32768
SF        100.6127890 MHz
WDW       EM
SSB       0
LB        1.00 Hz
GB        0
PC        1.40
    
```



WH9-p-Nitro R

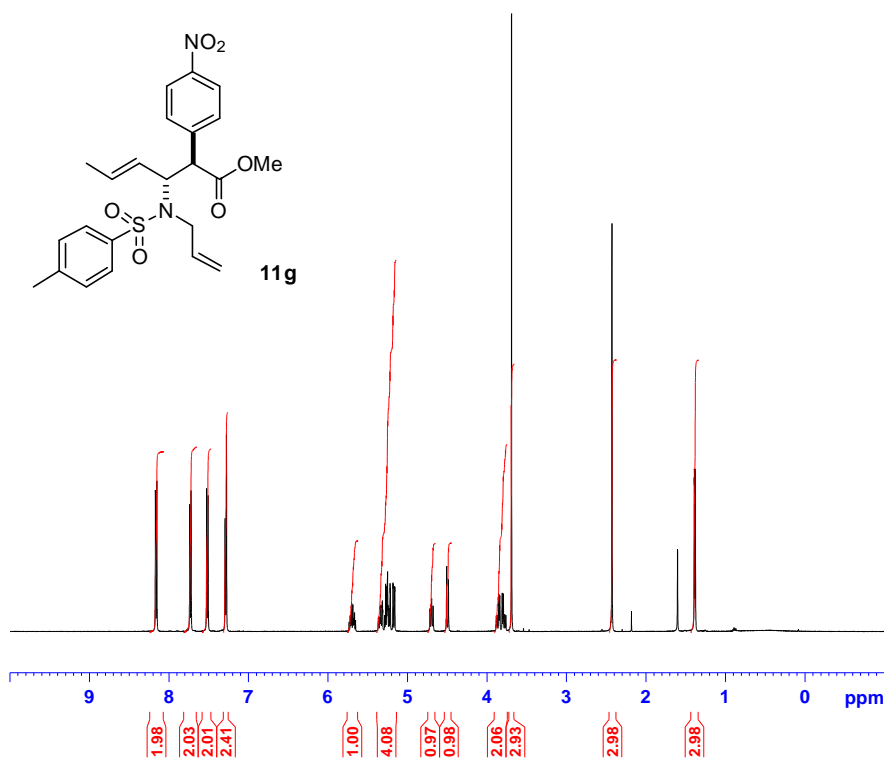

Current Data Parameters  
 NAME WH9-p-Nitro R  
 EXPNO 1  
 PROCNO 1

F2 - Acquisition Parameters  
 Date\_ 20100919  
 Time\_ 11.07  
 INSTRUM spect  
 PROBHD 5 mm PABBO BB/  
 PULPROG zg30  
 TD 65536  
 SOLVENT CDCl3  
 NS 5  
 DS 0  
 SWH 10330.578 Hz  
 FIDRES 0.157632 Hz  
 AQ 3.1719923 sec  
 RG 256  
 DW 48.400 usec  
 DE 6.00 usec  
 TE 298.0 K  
 D1 1.0000000 sec  
 TD0 1

===== CHANNEL f1 =====  
 NUC1 1H  
 P1 9.50 usec  
 PL1 -1.00 dB  
 SFO1 500.1330885 MHz

F2 - Processing parameters  
 SI 32768  
 SF 500.1300000 MHz  
 WDW no  
 SSB 0  
 LB 0.00 Hz  
 GB 0  
 PC 1.00

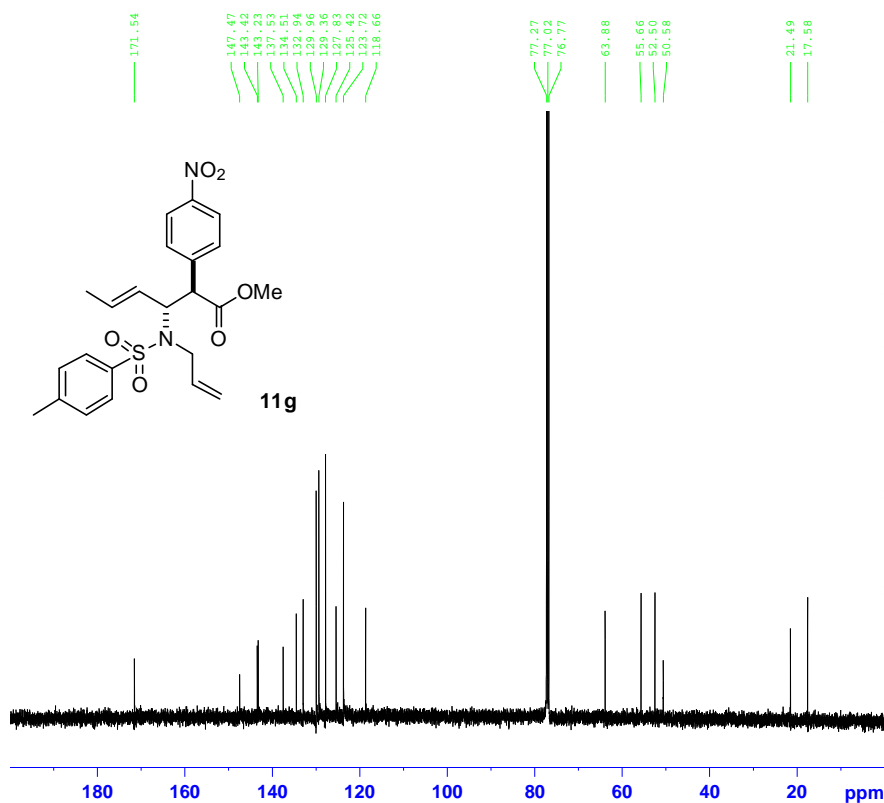

Current Data Parameters  
 NAME WH9-p-Nitro R  
 EXPNO 2  
 PROCNO 1

F2 - Acquisition Parameters  
 Date\_ 20100919  
 Time\_ 11.09  
 INSTRUM spect  
 PROBHD 5 mm PABBO BB/  
 PULPROG zgpg30  
 TD 65536  
 SOLVENT CDCl3  
 NS 139  
 DS 4  
 SWH 29761.904 Hz  
 FIDRES 0.454131 Hz  
 AQ 1.1010548 sec  
 RG 362  
 DW 16.800 usec  
 DE 6.00 usec  
 TE 298.0 K  
 D1 2.0000000 sec  
 d11 0.0300000 sec  
 DELTA 1.8999998 sec  
 TD0 1

===== CHANNEL f1 =====  
 NUC1 13C  
 P1 7.50 usec  
 PL1 0.34 dB  
 SFO1 125.7703643 MHz

===== CHANNEL f2 =====  
 CPDPRG2 waltz16  
 NUC2 1H  
 PCPD2 80.00 usec  
 PL12 17.98 dB  
 PL13 20.00 dB  
 PL2 -1.00 dB  
 SFO2 500.1320005 MHz

F2 - Processing parameters  
 SI 32768  
 SF 125.7577890 MHz  
 WDW EM  
 SSB 0  
 LB 1.00 Hz  
 GB 0  
 PC 1.40

WH9-175-B1

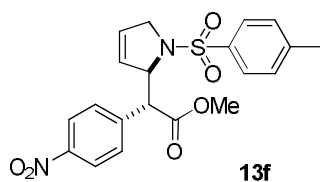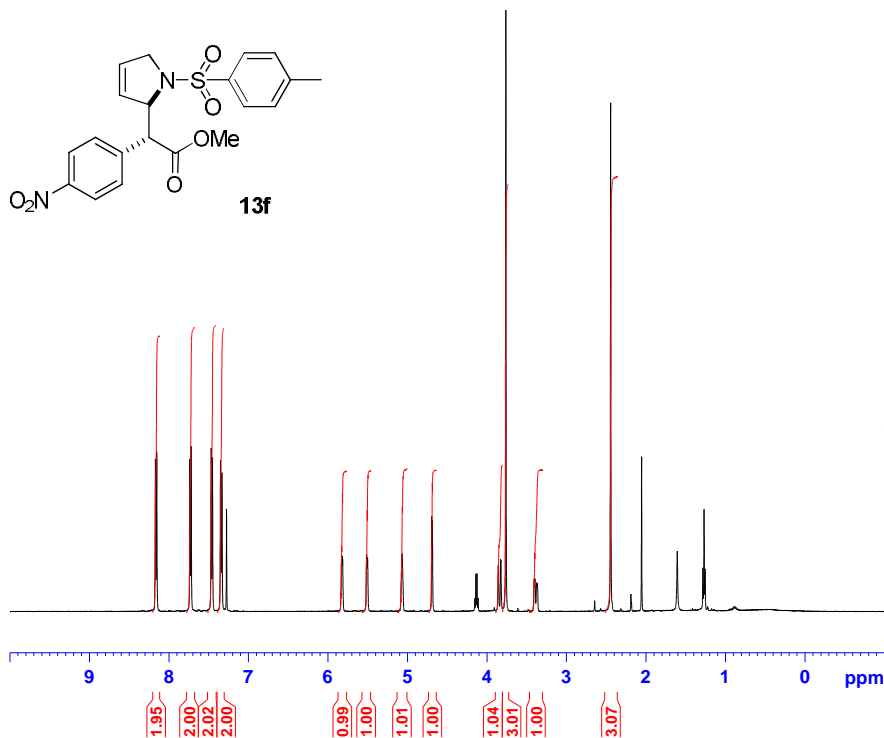

Current Data Parameters  
 NAME WH9-175-B1  
 EXPNO 1  
 PROCNO 1

F2 - Acquisition Parameters  
 Date\_ 20100922  
 Time 13.00  
 INSTRUM spect  
 PROBHD 5 mm PABBO BB/  
 PULPROG zg30  
 TD 65536  
 SOLVENT CDCl3  
 NS 8  
 DS 0  
 SWH 10330.578 Hz  
 FIDRES 0.157632 Hz  
 AQ 3.1719923 sec  
 RG 256  
 DW 48.400 usec  
 DE 6.00 usec  
 TE 298.0 K  
 D1 1.0000000 sec  
 TDO 1

===== CHANNEL f1 =====  
 NUC1 1H  
 P1 9.50 usec  
 PL1 -1.00 dB  
 SFO1 500.1330885 MHz

F2 - Processing parameters  
 SI 32768  
 SF 500.1300000 MHz  
 WDW no  
 SSB 0  
 LB 0.00 Hz  
 GB 0  
 PC 1.00

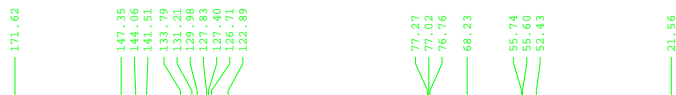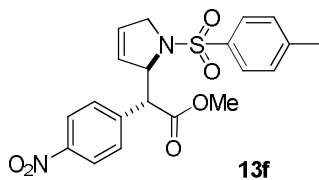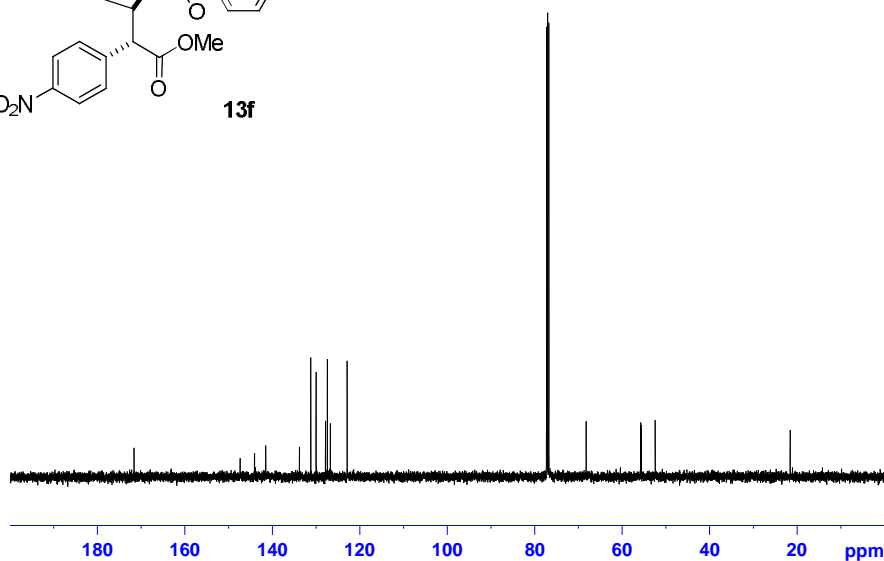

Current Data Parameters  
 NAME WH9-175-B1  
 EXPNO 2  
 PROCNO 1

F2 - Acquisition Parameters  
 Date\_ 20100922  
 Time 13.06  
 INSTRUM spect  
 PROBHD 5 mm PABBO BB/  
 PULPROG zgpg30  
 TD 65536  
 SOLVENT CDCl3  
 NS 75  
 DS 4  
 SWH 29761.904 Hz  
 FIDRES 0.454131 Hz  
 AQ 1.1010548 sec  
 RG 812  
 DW 16.800 usec  
 DE 6.00 usec  
 TE 298.1 K  
 D1 2.0000000 sec  
 d11 0.0300000 sec  
 DELTA 1.8999998 sec  
 TDO 1

===== CHANNEL f1 =====  
 NUC1 13C  
 P1 7.50 usec  
 PL1 0.34 dB  
 SFO1 125.7703643 MHz

===== CHANNEL f2 =====  
 CPDPRG2 waltz16  
 NUC2 1H  
 PCPD2 80.00 usec  
 PL12 17.98 dB  
 PL13 20.00 dB  
 PL2 -1.00 dB  
 SFO2 500.1320005 MHz

F2 - Processing parameters  
 SI 32768  
 SF 125.7577890 MHz  
 WDW EM  
 SSB 0  
 LB 1.00 Hz  
 GB 0  
 PC 1.40

WH9-137-A1

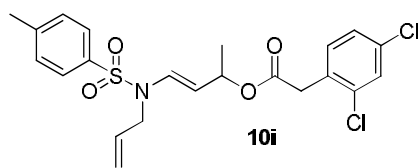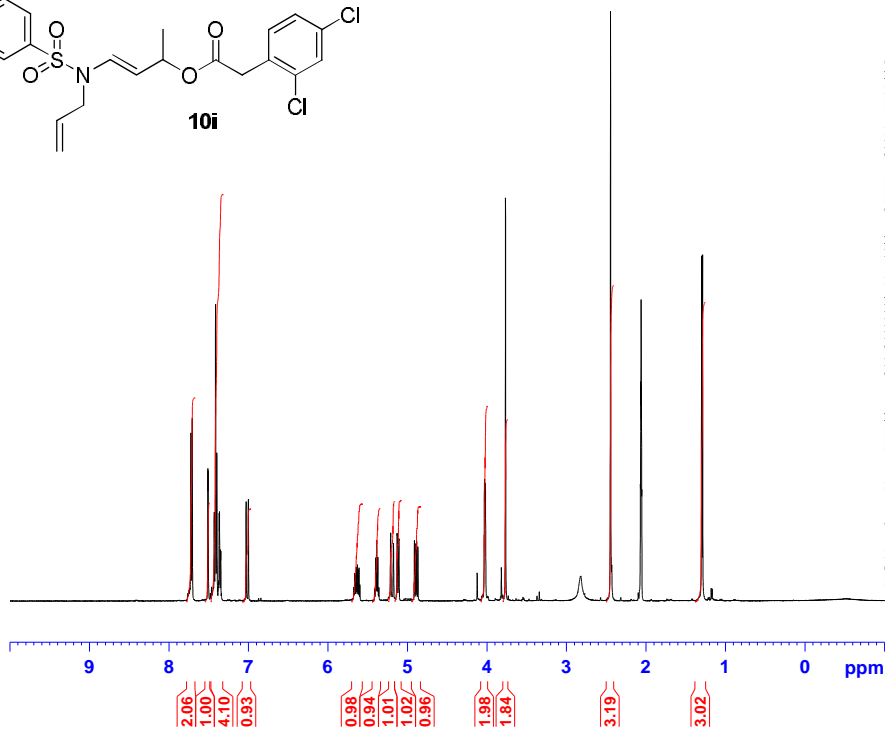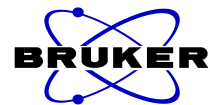

Current Data Parameters  
 NAME WH9-137-A1  
 EXPNO 1  
 PROCNO 1

F2 - Acquisition Parameters  
 Date\_ 20100911  
 Time 11.10  
 INSTRUM spect  
 PROBHD 5 mm PABBO BB/  
 PULPROG zg30  
 TD 65536  
 SOLVENT Acetone  
 NS 8  
 DS 0  
 SWH 10330.578 Hz  
 FIDRES 0.157632 Hz  
 AQ 3.1719923 sec  
 RG 228  
 DW 48.400 usec  
 DE 6.00 usec  
 TE 298.0 K  
 D1 1.0000000 sec  
 TD0 1

===== CHANNEL f1 =====  
 NUC1 1H  
 P1 9.50 usec  
 PL1 -1.00 dB  
 SFO1 500.1330885 MHz

F2 - Processing parameters  
 SI 32768  
 SF 500.1330000 MHz  
 WF no  
 SSB 0  
 LB 0.00 Hz  
 GB 0  
 PC 1.00

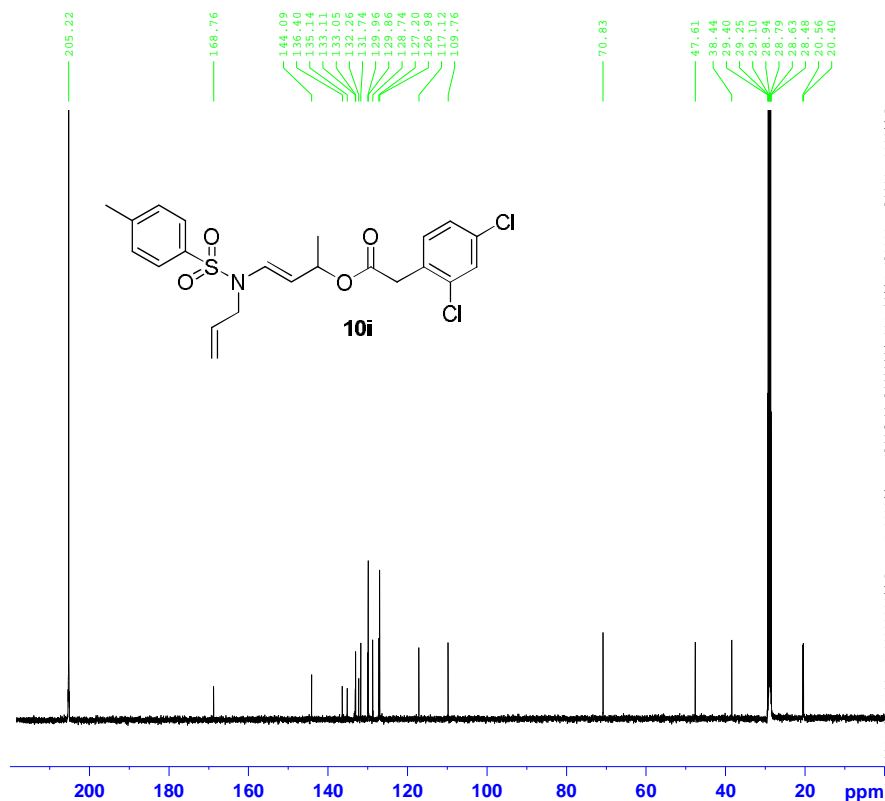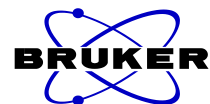

Current Data Parameters  
 NAME WH9-137-A1  
 EXPNO 2  
 PROCNO 1

F2 - Acquisition Parameters  
 Date\_ 20100911  
 Time 11.25  
 INSTRUM spect  
 PROBHD 5 mm PABBO BB/  
 PULPROG zgpg30  
 TD 65536  
 SOLVENT Acetone  
 NS 256  
 DS 4  
 SWH 29761.904 Hz  
 FIDRES 0.454131 Hz  
 AQ 1.1010548 sec  
 RG 575  
 DW 16.800 usec  
 DE 6.00 usec  
 TE 298.0 K  
 D1 2.0000000 sec  
 d11 0.0300000 sec  
 DELTA 1.89999998 sec  
 TD0 1

===== CHANNEL f1 =====  
 NUC1 13C  
 P1 7.50 usec  
 PL1 0.34 dB  
 SFO1 125.7703643 MHz

===== CHANNEL f2 =====  
 CPDPRG2 waltz16  
 NUC2 1H  
 PCPD2 80.00 usec  
 PL12 17.98 dB  
 PL13 20.00 dB  
 PL2 -1.00 dB  
 SFO2 500.1320005 MHz

F2 - Processing parameters  
 SI 32768  
 SF 125.7577890 MHz  
 WF EM  
 SSB 0  
 LB 1.00 Hz  
 GB 0  
 PC 1.40

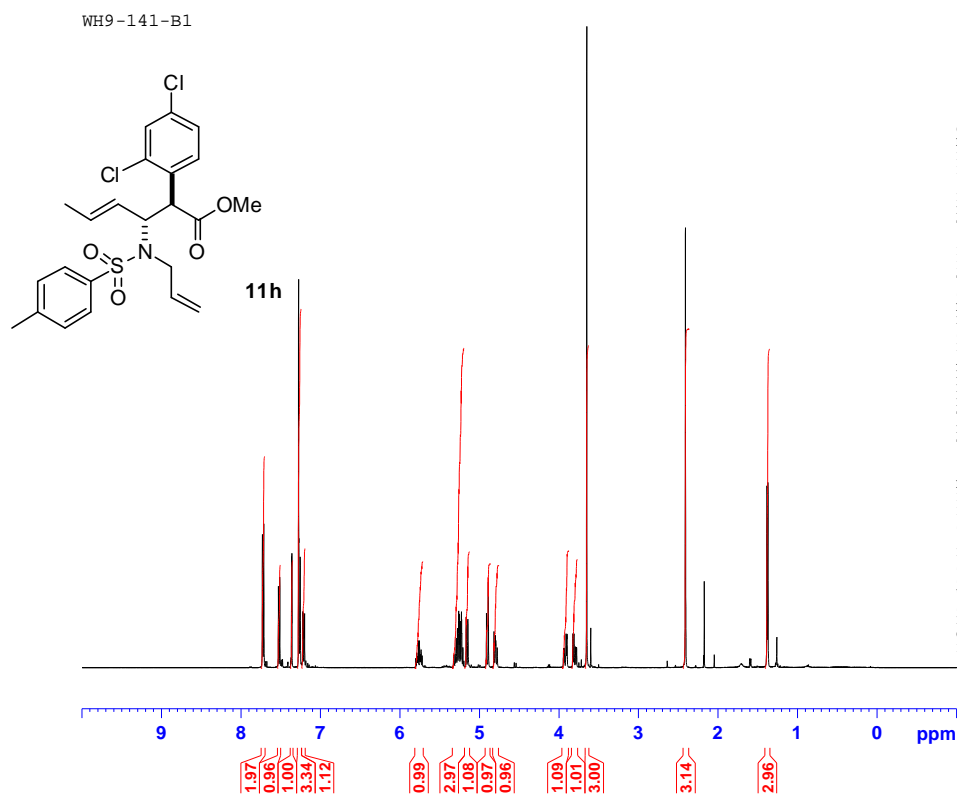

Current Data Parameters  
 NAME WH9-141-B1  
 EXPNO 1  
 PROCNO 1

F2 - Acquisition Parameters  
 Date\_ 20100913  
 Time\_ 13.38  
 INSTRUM spect  
 PROBHD 5 mm PABBO BB/  
 PULPROG zg30  
 TD 65536  
 SOLVENT CDCl3  
 NS 8  
 DS 0  
 SWH 10330.578 Hz  
 FIDRES 0.157632 Hz  
 AQ 3.1719923 sec  
 RG 64  
 DW 48.400 usec  
 DE 6.00 usec  
 TE 298.0 K  
 D1 1.0000000 sec  
 TD0 1

===== CHANNEL f1 =====  
 NUC1 1H  
 P1 9.50 usec  
 PL1 -1.00 dB  
 SFO1 500.1330885 MHz

F2 - Processing parameters  
 SI 32768  
 SF 500.1300000 MHz  
 WDW no  
 SSB 0  
 LB 0.00 Hz  
 GB 0  
 PC 1.00

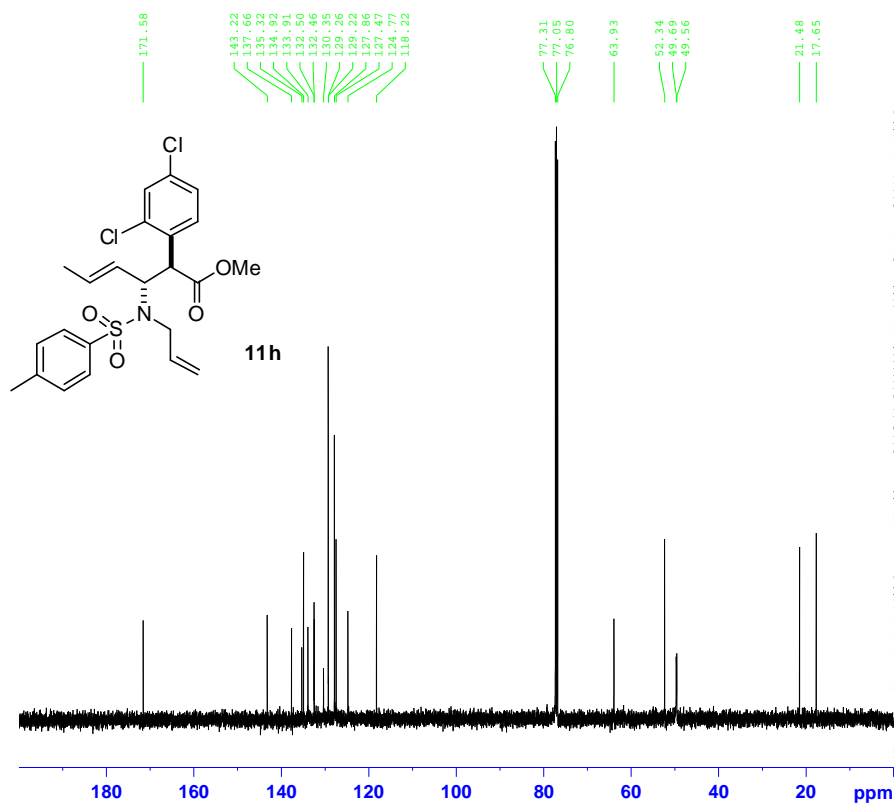

Current Data Parameters  
 NAME WH9-141-B1  
 EXPNO 2  
 PROCNO 1

F2 - Acquisition Parameters  
 Date\_ 20100913  
 Time\_ 13.41  
 INSTRUM spect  
 PROBHD 5 mm PABBO BB/  
 PULPROG zgpg30  
 TD 65536  
 SOLVENT CDCl3  
 NS 57  
 DS 4  
 SWH 29761.904 Hz  
 FIDRES 0.454131 Hz  
 AQ 1.1010548 sec  
 RG 645  
 DW 16.800 usec  
 DE 6.00 usec  
 TE 298.0 K  
 D1 2.0000000 sec  
 d11 0.0300000 sec  
 DELTA 1.8999998 sec  
 TD0 1

===== CHANNEL f1 =====  
 NUC1 13C  
 P1 7.50 usec  
 PL1 0.34 dB  
 SFO1 125.7703643 MHz

===== CHANNEL f2 =====  
 CPDPRG2 waltz16  
 NUC2 1H  
 PCPD2 80.00 usec  
 PL12 17.98 dB  
 PL13 20.00 dB  
 PL2 -1.00 dB  
 SFO2 500.1320005 MHz

F2 - Processing parameters  
 SI 32768  
 SF 125.7577890 MHz  
 WDW EM  
 SSB 0  
 LB 1.00 Hz  
 GB 0  
 PC 1.40

WH9-157-1-B1

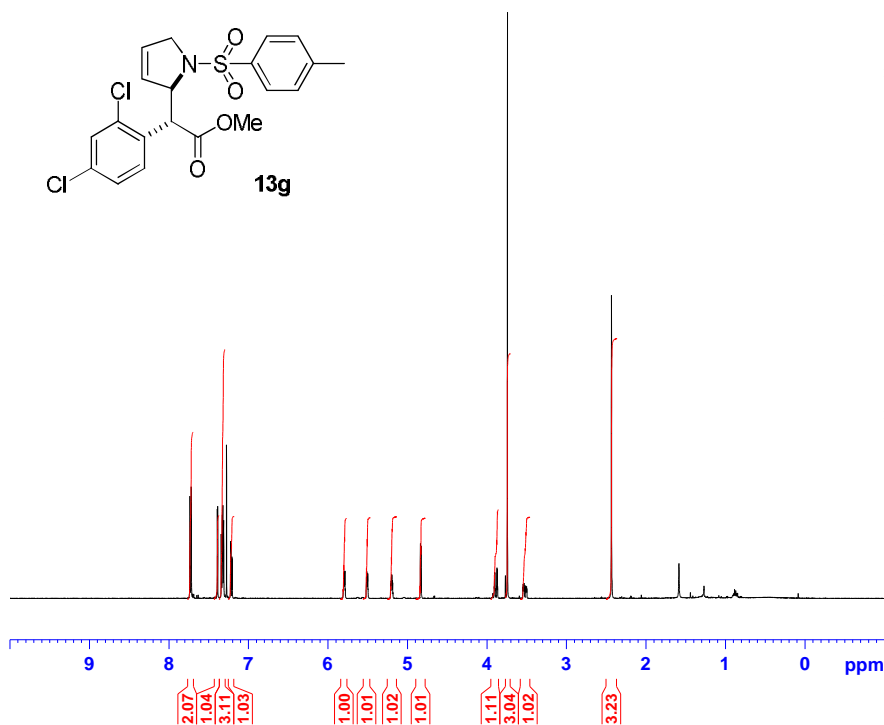

Current Data Parameters  
 NAME WH9-157-1-B1  
 EXPNO 1  
 PROCNO 1

F2 - Acquisition Parameters  
 Date\_ 20100918  
 Time\_ 11.26  
 INSTRUM spect  
 PROBHD 5 mm PABBO BB/  
 PULPROG zg30  
 TD 65536  
 SOLVENT CDCl3  
 NS 7  
 DS 0  
 SWH 10330.578 Hz  
 FIDRES 0.157632 Hz  
 AQ 3.1719923 sec  
 RG 228  
 DW 48.400 usec  
 DE 6.00 usec  
 TE 298.0 K  
 D1 1.0000000 sec  
 TD0 1

==== CHANNEL f1 =====  
 NUC1 1H  
 P1 9.50 usec  
 PL1 -1.00 dB  
 SFO1 500.1330885 MHz

F2 - Processing parameters  
 SI 32768  
 SF 500.1300000 MHz  
 WDW no  
 SSB 0  
 LB 0.00 Hz  
 GB 0  
 PC 1.00

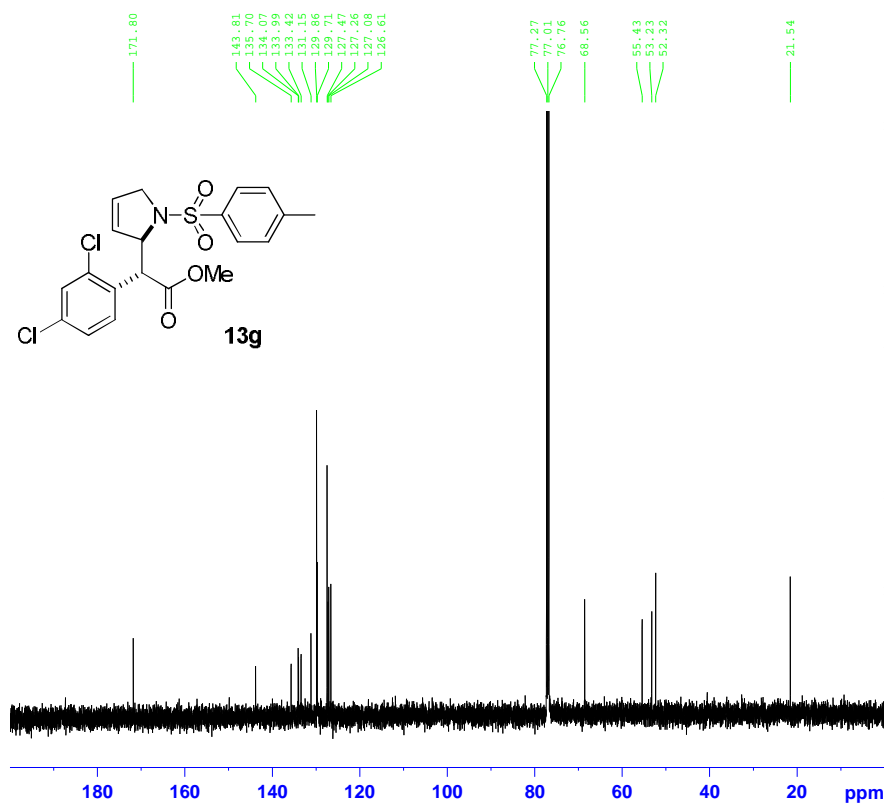

Current Data Parameters  
 NAME WH9-157-1-B1  
 EXPNO 2  
 PROCNO 1

F2 - Acquisition Parameters  
 Date\_ 20100918  
 Time\_ 11.29  
 INSTRUM spect  
 PROBHD 5 mm PABBO BB/  
 PULPROG zgpg30  
 TD 65536  
 SOLVENT CDCl3  
 NS 133  
 DS 4  
 SWH 29761.904 Hz  
 FIDRES 0.454131 Hz  
 AQ 1.1010548 sec  
 RG 362  
 DW 16.800 usec  
 DE 6.00 usec  
 TE 297.9 K  
 D1 2.0000000 sec  
 d11 0.0300000 sec  
 DELTA 1.8999998 sec  
 TD0 1

==== CHANNEL f1 =====  
 NUC1 13C  
 P1 7.50 usec  
 PL1 0.34 dB  
 SFO1 125.7703643 MHz

==== CHANNEL f2 =====  
 CPDPRG2 waltz16  
 NUC2 1H  
 PCPD2 80.00 usec  
 PL12 17.98 dB  
 PL13 20.00 dB  
 PL2 -1.00 dB  
 SFO2 500.1320005 MHz

F2 - Processing parameters  
 SI 32768  
 SF 125.7577890 MHz  
 WDW EM  
 SSB 0  
 LB 1.00 Hz  
 GB 0  
 PC 1.40

WH3-159-A1

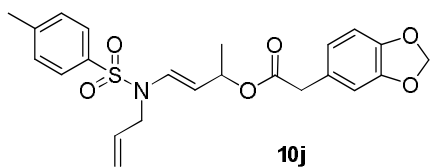

Current Data Parameters  
 NAME WH3-159-A1  
 EXPNO 1  
 PROCNO 1

F2 - Acquisition Parameters  
 Date\_ 20080912  
 Time\_ 14.58  
 INSTRUM spect  
 PROBHD 5 mm PABBO BB/  
 PULPROG zg30  
 TD 65536  
 SOLVENT CDCl3  
 NS 8  
 DS 0  
 SWH 10330.578 Hz  
 FIDRES 0.157632 Hz  
 AQ 3.1719923 sec  
 RG 45.2  
 DW 48.400 usec  
 DE 5.00 usec  
 TE 297.9 K  
 D1 1.0000000 sec  
 TD0 1

===== CHANNEL f1 =====  
 NUC1 1H  
 P1 9.50 usec  
 PL1 -1.00 dB  
 SFO1 500.1330885 MHz

F2 - Processing parameters  
 SI 32768  
 SF 500.1300000 MHz  
 WDW no  
 SSB 0  
 LB 0.00 Hz  
 GB 0  
 PC 1.00

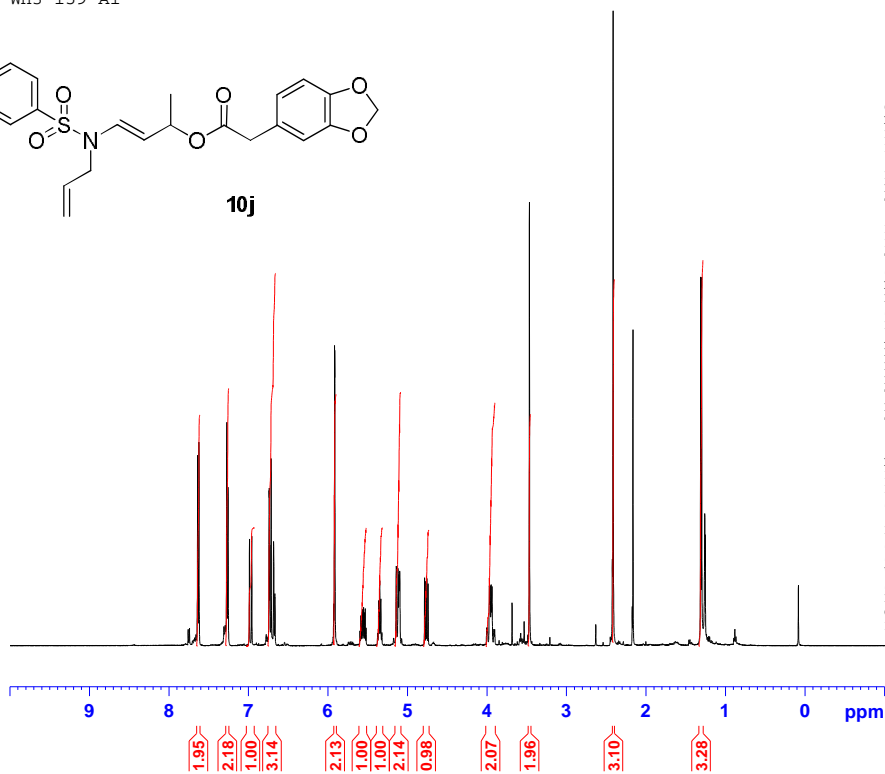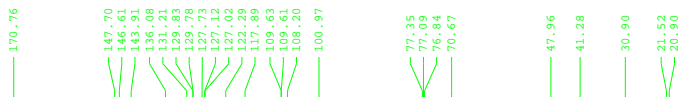

Current Data Parameters  
 NAME WH3-159-A1  
 EXPNO 2  
 PROCNO 1

F2 - Acquisition Parameters  
 Date\_ 20080912  
 Time\_ 15.55  
 INSTRUM spect  
 PROBHD 5 mm PABBO BB/  
 PULPROG zgpg30  
 TD 65536  
 SOLVENT CDCl3  
 NS 256  
 DS 4  
 SWH 29761.904 Hz  
 FIDRES 0.454131 Hz  
 AQ 1.1010548 sec  
 RG 362  
 DW 16.800 usec  
 DE 6.00 usec  
 TE 297.9 K  
 D1 2.0000000 sec  
 d11 0.0300000 sec  
 DELTA 1.8999998 sec  
 TD0 1

===== CHANNEL f1 =====  
 NUC1 13C  
 P1 7.50 usec  
 PL1 0.34 dB  
 SFO1 125.7703643 MHz

===== CHANNEL f2 =====  
 CPDPRG2 waltz16  
 NUC2 1H  
 PCPD2 80.00 usec  
 PL12 17.98 dB  
 PL13 20.00 dB  
 PL2 -1.00 dB  
 SFO2 500.1320005 MHz

F2 - Processing parameters  
 SI 32768  
 SF 125.7577890 MHz  
 WDW no  
 SSB 0  
 LB 0.00 Hz  
 GB 0  
 PC 1.40

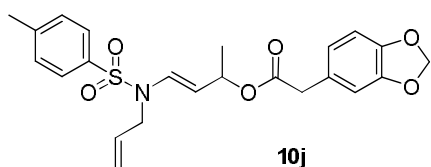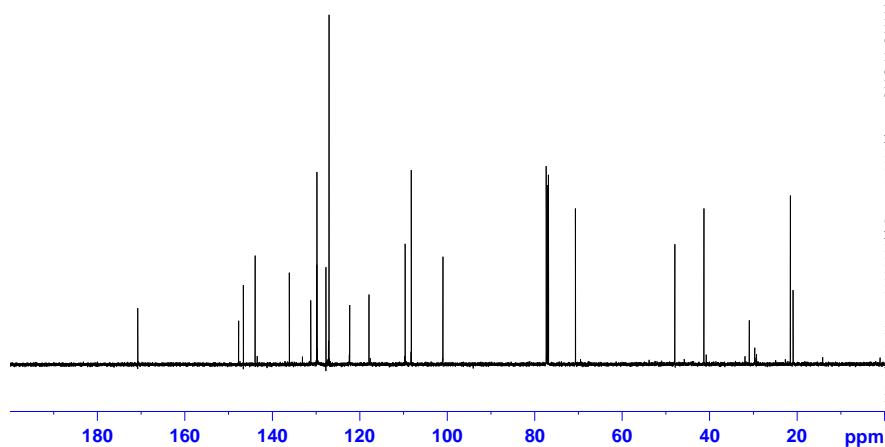

WH9-101-B1

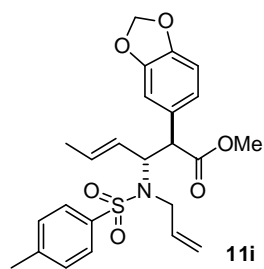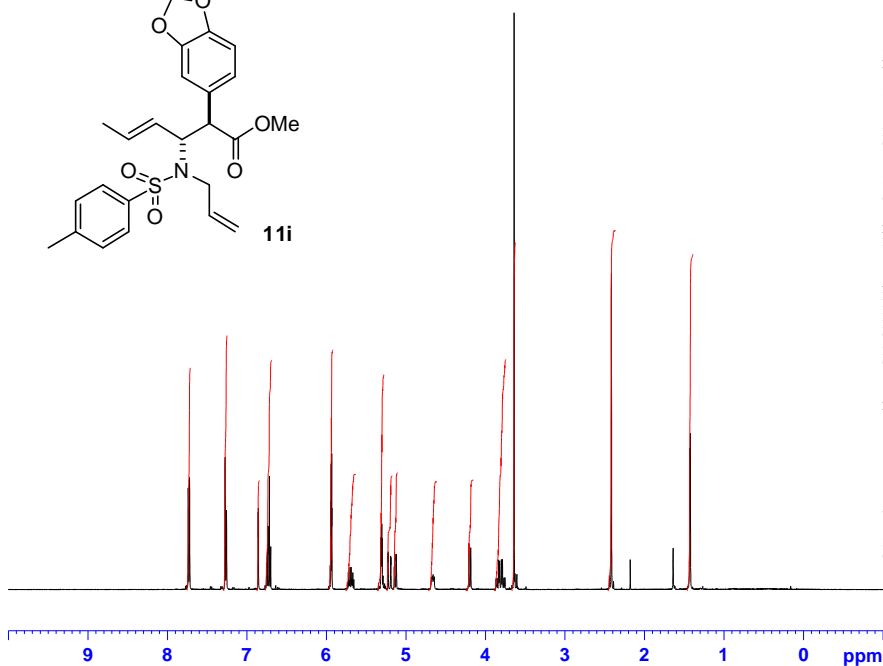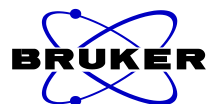

Current Data Parameters  
 NAME WH9-101-B1  
 EXPNO 1  
 PROCNO 1

F2 - Acquisition Parameters  
 Date\_ 20100906  
 Time\_ 11.08  
 INSTRUM spect  
 PROBHD 5 mm PABBO BB/  
 PULPROG zg30  
 TD 65536  
 SOLVENT CDCl3  
 NS 8  
 DS 0  
 SWH 10330.578 Hz  
 FIDRES 0.157632 Hz  
 AQ 3.1719923 sec  
 RG 161  
 DW 48.400 usec  
 DE 6.00 usec  
 TE 298.0 K  
 D1 1.0000000 sec  
 TDO 1

==== CHANNEL f1 =====  
 NUC1 1H  
 P1 9.50 usec  
 PL1 -1.00 dB  
 SFO1 500.1330885 MHz

F2 - Processing parameters  
 SI 32768  
 SF 500.1330000 MHz  
 WDW no  
 SSB 0  
 LB 0.00 Hz  
 GB 0  
 PC 1.00

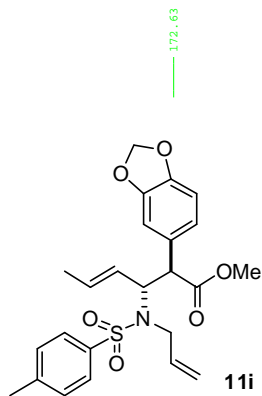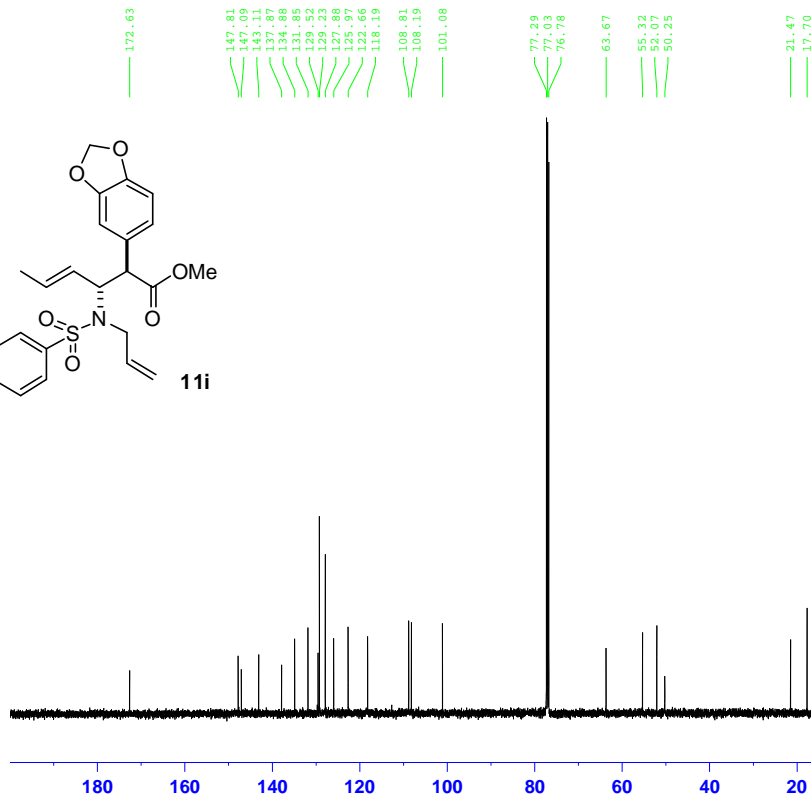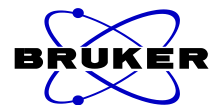

Current Data Parameters  
 NAME WH9-101-B1  
 EXPNO 2  
 PROCNO 1

F2 - Acquisition Parameters  
 Date\_ 20100906  
 Time\_ 11.14  
 INSTRUM spect  
 PROBHD 5 mm PABBO BB/  
 PULPROG zgpg30  
 TD 65536  
 SOLVENT CDCl3  
 NS 99  
 DS 4  
 SWH 29761.904 Hz  
 FIDRES 0.454131 Hz  
 AQ 1.1010548 sec  
 RG 362  
 DW 16.800 usec  
 DE 6.00 usec  
 TE 298.0 K  
 D1 2.0000000 sec  
 d11 0.0300000 sec  
 DELTA 1.89999998 sec  
 TDO 1

==== CHANNEL f1 =====  
 NUC1 13C  
 P1 7.50 usec  
 PL1 0.34 dB  
 SFO1 125.7703643 MHz

==== CHANNEL f2 =====  
 CPDPRG2 waltz16  
 NUC2 1H  
 PCPD2 80.00 usec  
 PL12 17.98 dB  
 PL13 20.00 dB  
 PL2 -1.00 dB  
 SFO2 500.1320005 MHz

F2 - Processing parameters  
 SI 32768  
 SF 125.7577890 MHz  
 WDW EM  
 SSB 0  
 LB 1.00 Hz  
 GB 0  
 PC 1.40

WH9-145-3-B2

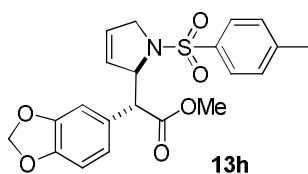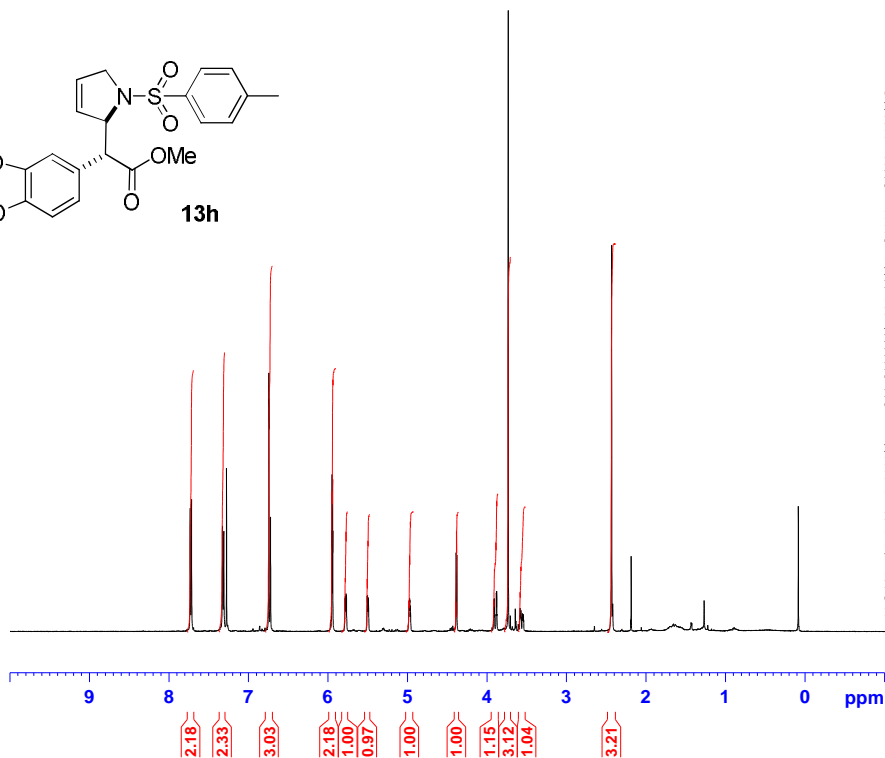

Current Data Parameters  
 NAME WH9-145-3-B2  
 EXPNO 1  
 PROCNO 1

F2 - Acquisition Parameters  
 Date\_ 20100915  
 Time 11.09  
 INSTRUM spect  
 PROBHD 5 mm PABBO BB/  
 PULPROG zg30  
 TD 65536  
 SOLVENT CDCl3  
 NS 8  
 DS 0  
 SWH 10330.578 Hz  
 FIDRES 0.157632 Hz  
 AQ 3.1719923 sec  
 RG 256  
 DW 48.400 usec  
 DE 6.00 usec  
 TE 294.3 K  
 D1 1.0000000 sec  
 TD0 1

===== CHANNEL f1 =====  
 NUC1 1H  
 P1 9.50 usec  
 PL1 -1.00 dB  
 SFO1 500.1330885 MHz

F2 - Processing parameters  
 SI 32768  
 SF 500.1300000 MHz  
 WDW no  
 SSB 0  
 LB 0.00 Hz  
 GB 0  
 PC 1.00

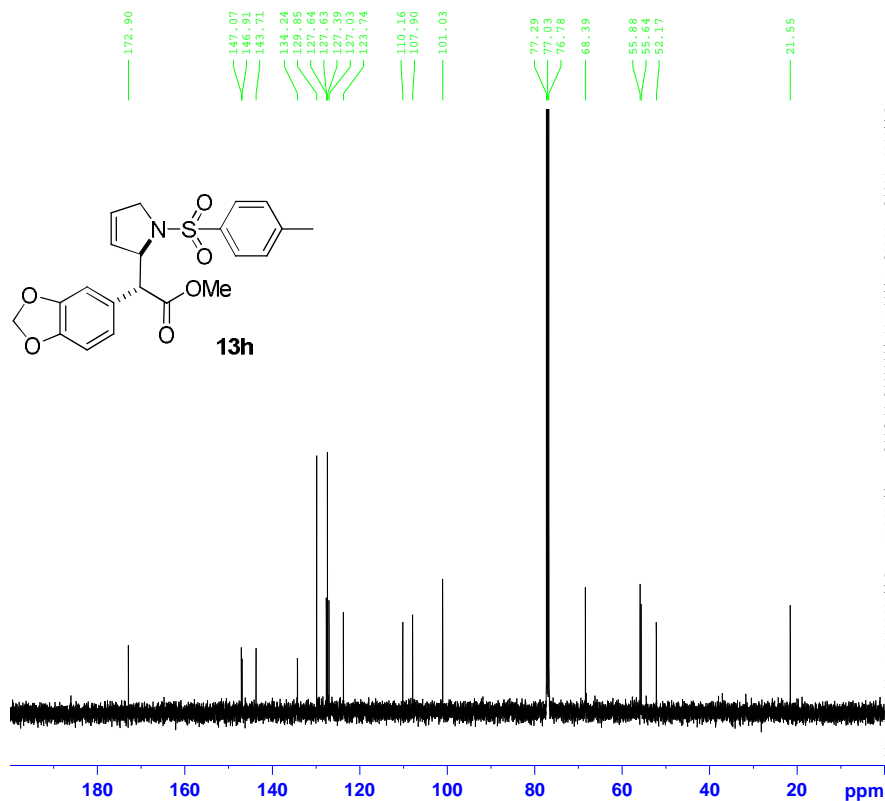

Current Data Parameters  
 NAME WH9-145-3-B2  
 EXPNO 2  
 PROCNO 1

F2 - Acquisition Parameters  
 Date\_ 20100915  
 Time 11.13  
 INSTRUM spect  
 PROBHD 5 mm PABBO BB/  
 PULPROG zgpg30  
 TD 65536  
 SOLVENT CDCl3  
 NS 96  
 DS 4  
 SWH 29761.904 Hz  
 FIDRES 0.454131 Hz  
 AQ 1.1010548 sec  
 RG 362  
 DW 16.800 usec  
 DE 6.00 usec  
 TE 295.0 K  
 D1 2.0000000 sec  
 d11 0.0300000 sec  
 DELTA 1.89999998 sec  
 TD0 1

===== CHANNEL f1 =====  
 NUC1 13C  
 P1 7.50 usec  
 PL1 0.34 dB  
 SFO1 125.7703643 MHz

===== CHANNEL f2 =====  
 CPDPRG2 waltz16  
 NUC2 1H  
 PCPD2 80.00 usec  
 PL12 17.98 dB  
 PL13 20.00 dB  
 PL2 -1.00 dB  
 SFO2 500.1320005 MHz

F2 - Processing parameters  
 SI 32768  
 SF 125.7577890 MHz  
 WDW EM  
 SSB 0  
 LB 1.00 Hz  
 GB 0  
 PC 1.40



## HPLC Data

### (*anti-E*)-Methyl 3-(*N*-allyl-4-methylphenylsulfonamido)-2-phenylhex-4-enoate (*rac*-11d)

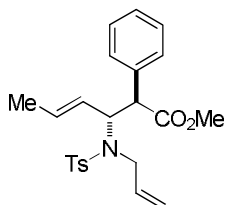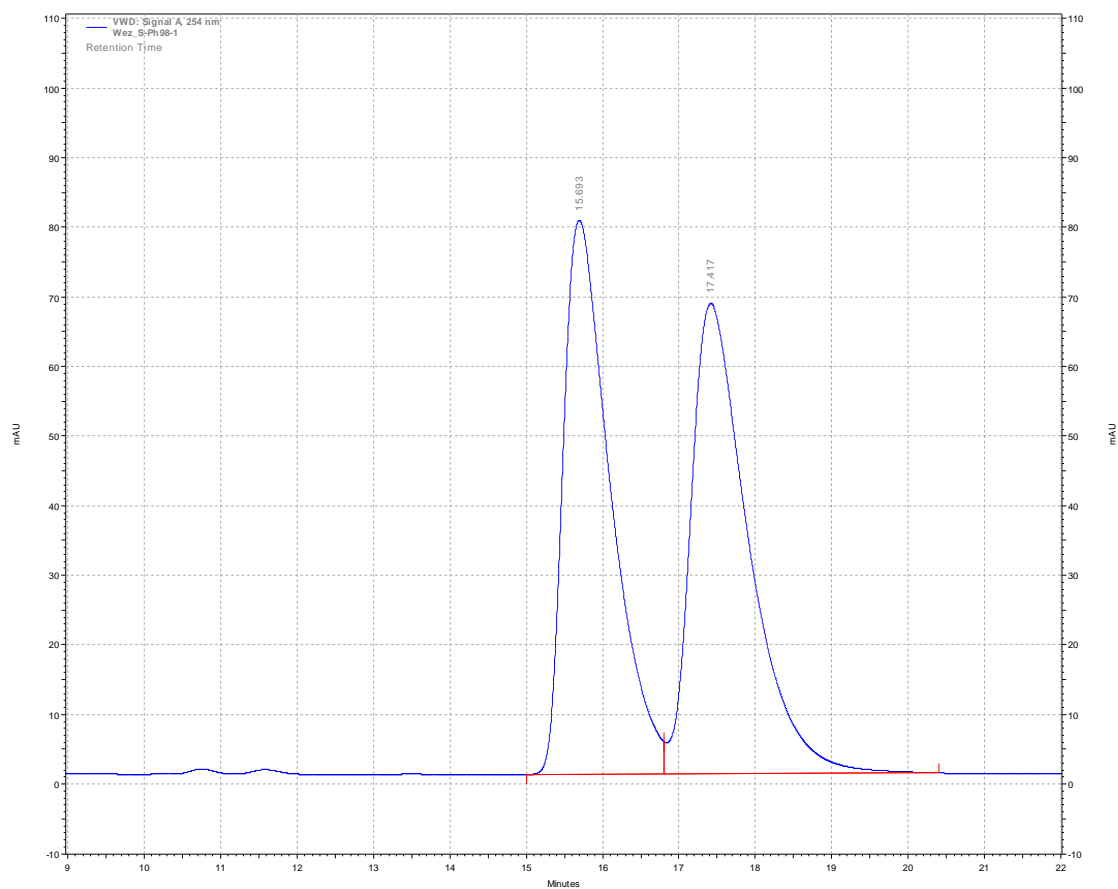

#### VWD: Signal A, 254 nm Results

| Retention Time | Area     | Area % | Height  | Height % |
|----------------|----------|--------|---------|----------|
| 15.693         | 57182044 | 49.13  | 1335586 | 54.09    |
| 17.417         | 59210450 | 50.87  | 1133646 | 45.91    |

|        |           |        |         |        |
|--------|-----------|--------|---------|--------|
| Totals | 116392494 | 100.00 | 2469232 | 100.00 |
|--------|-----------|--------|---------|--------|

**(2*R*,3*R*,*E*)-methyl 3-(*N*-allyl-4-methylphenylsulfonamido)-2-phenylhex-4-enoate**  
**(*S*)-(2*R*,3*R*-11d)**

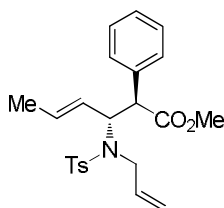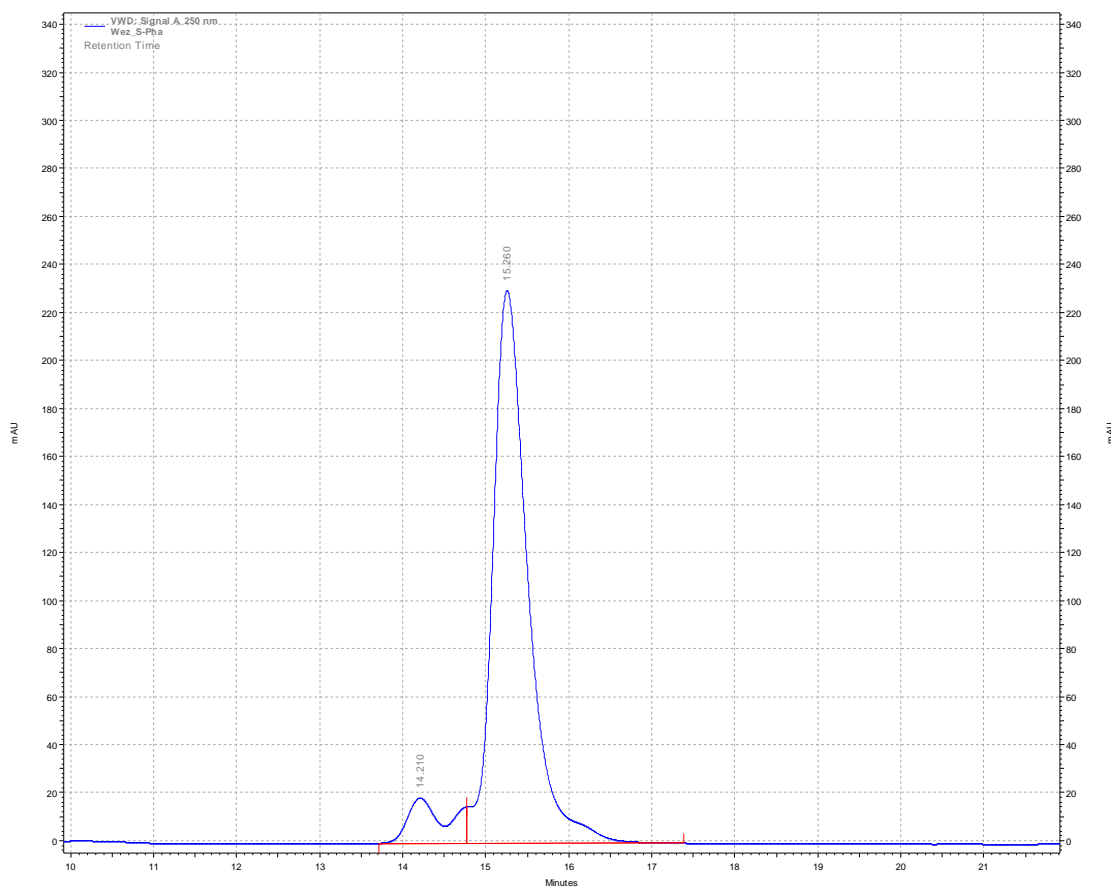

**VWD: Signal**

**A, 250 nm**

**Results**

| Retention Time | Area      | Area % | Height  | Height % |
|----------------|-----------|--------|---------|----------|
| 14.210         | 10037774  | 8.15   | 316073  | 7.56     |
| 15.260         | 113118091 | 91.85  | 3863316 | 92.44    |
| Totals         | 123155865 | 100.00 | 4179389 | 100.00   |
